# Supplementary material for: Suicide postvention for staff and students on university campuses: a scoping review
Source: PubMed Central journal article supplement — BMJ Open. 2023 Jun 16;13(6):e068730. doi: 10.1136/bmjopen-2022-068730 (PMC10277115; doi:10.1136/bmjopen-2022-068730), 2023-06-16
Supplement: bmjopen-2022-068730.draft_revisions.pdf [file bmjopen-2022-068730.draft_revisions.pdf]

# BMJ Open

BMJ Open is committed to open peer review. As part of this commitment we make the peer review history of every article we publish publicly available.

When an article is published we post the peer reviewers' comments and the authors' responses online. We also post the versions of the paper that were used during peer review. These are the versions that the peer review comments apply to.

The versions of the paper that follow are the versions that were submitted during the peer review process. They are not the versions of record or the final published versions. They should not be cited or distributed as the published version of this manuscript.

BMJ Open is an open access journal and the full, final, typeset and author-corrected version of record of the manuscript is available on our site with no access controls, subscription charges or pay-per-view fees (<http://bmjopen.bmj.com>).

If you have any questions on BMJ Open's open peer review process please email [info.bmjopen@bmj.com](mailto:info.bmjopen@bmj.com)

# BMJ Open

## Suicide postvention for staff and students on university campuses: A scoping review

|                               |                                                                                                                                                                                                                                                                                                                                                         |
|-------------------------------|---------------------------------------------------------------------------------------------------------------------------------------------------------------------------------------------------------------------------------------------------------------------------------------------------------------------------------------------------------|
| Journal:                      | <i>BMJ Open</i>                                                                                                                                                                                                                                                                                                                                         |
| Manuscript ID                 | bmjopen-2022-068730                                                                                                                                                                                                                                                                                                                                     |
| Article Type:                 | Original research                                                                                                                                                                                                                                                                                                                                       |
| Date Submitted by the Author: | 05-Oct-2022                                                                                                                                                                                                                                                                                                                                             |
| Complete List of Authors:     | Allie, Sophia-Lorraine; Stellenbosch University, Psychology<br>Bantjes, Jason; South African Medical Research Council, Alcohol, Tobacco and Other Drug Research Unit; Stellenbosch University, Department of Global Health<br>Andriessen, Karl; The University of Melbourne, Centre for Mental Health, Melbourne School of Population and Global Health |
| Keywords:                     | Suicide & self-harm < PSYCHIATRY, EDUCATION & TRAINING (see Medical Education & Training), Adult psychiatry < PSYCHIATRY                                                                                                                                                                                                                                |
|                               |                                                                                                                                                                                                                                                                                                                                                         |

SCHOLARONE™  
Manuscripts

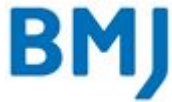

I, the Submitting Author has the right to grant and does grant on behalf of all authors of the Work (as defined in the below author licence), an exclusive licence and/or a non-exclusive licence for contributions from authors who are: i) UK Crown employees; ii) where BMJ has agreed a CC-BY licence shall apply, and/or iii) in accordance with the terms applicable for US Federal Government officers or employees acting as part of their official duties; on a worldwide, perpetual, irrevocable, royalty-free basis to BMJ Publishing Group Ltd ("BMJ") its licensees and where the relevant Journal is co-owned by BMJ to the co-owners of the Journal, to publish the Work in this journal and any other BMJ products and to exploit all rights, as set out in our [licence](#).

The Submitting Author accepts and understands that any supply made under these terms is made by BMJ to the Submitting Author unless you are acting as an employee on behalf of your employer or a postgraduate student of an affiliated institution which is paying any applicable article publishing charge ("APC") for Open Access articles. Where the Submitting Author wishes to make the Work available on an Open Access basis (and intends to pay the relevant APC), the terms of reuse of such Open Access shall be governed by a Creative Commons licence – details of these licences and which [Creative Commons](#) licence will apply to this Work are set out in our licence referred to above.

Other than as permitted in any relevant BMJ Author's Self Archiving Policies, I confirm this Work has not been accepted for publication elsewhere, is not being considered for publication elsewhere and does not duplicate material already published. I confirm all authors consent to publication of this Work and authorise the granting of this licence.

---

# Suicide postvention for staff and students on university campuses: A scoping review

## AUTHORS

Sophia-Lorraine Allie<sup>1</sup> Jason Bantjes<sup>2,3</sup> Karl Andriessen<sup>4</sup>

Corresponding author: Sophia-Lorraine Allie, email: sophialorraine.allie@gmail.com

1. Department of Psychology, Faculty of Arts and Social Sciences, Stellenbosch University, Stellenbosch, South Africa

2. Alcohol, Tobacco and Other Drug Research Unit, South African Medical Research Council.

3. Department of Global Health, Faculty of Medicine and Health Sciences, Stellenbosch University

4. Centre for Mental Health, Melbourne School of Population and Global Health, The University of Melbourne, Melbourne, Australia

## ABSTRACT

**Objective:** To examine current knowledge about suicide bereavement and postvention interventions for staff and students at universities.

**Design:** Scoping review

**Data sources and eligibility:** We conducted systematic searches in 12 electronic databases, hand searched citations and consulted with library experts during the period of September 2021 and August 2022. Eligible studies were screened independently by two reviewers for inclusion using a checklist developed for this purpose. Only studies published in English were included.

**Data extraction and synthesis:** Screening was conducted by two independent reviewers following a 3-step article screening process. Biographical data and study characteristics were extracted using a data extraction form and synthesised.

**Results:** Our search strategy identified 7691 records from which 3170 abstracts were screened. We assessed 29 full texts and included 17 articles for the scoping review. All studies were from high-income countries (United States of America, Canada, United Kingdom). The review identified no postvention intervention studies on university campuses. Study designs were mostly descriptive quantitative, or mixed methods. Data collection and sampling were heterogeneous.

**Conclusion:** Staff and students are in need of support measures due to the impact of suicide bereavement and unique nature of the university context. There is a need for further research to move from descriptive studies to focus on intervention studies, particularly university campuses in low-and-middle-income countries.

## STRENGTHS AND LIMITATIONS OF THIS STUDY

- This scoping review was based on robust methodology for conducting scoping reviews.
- The selection process of eligible articles was conducted independently by two researchers.
- The review focused on postvention interventions for both staff and students on university campuses globally.
- The review provides a synthesis and critical examination of the research and practice in the area of postvention
- The scoping review was limited to peer-reviewed articles and primary studies published in English.

## INTRODUCTION

An estimated 700 000 people die by suicide each year, with suicide as the fourth leading cause of death among 15 to 29-year-olds globally (1). Death by suicide has a wide-reaching impact on the community. Meta-analysis has indicated that

1  
2  
3 approximately one in five people have experienced a suicide of someone close during  
4 their lifetime, and one in 20 in any given year (2). Studies have found that between six  
5 and 135 people are exposed to a single suicide (3, 4). A suicide does not only  
6 negatively affect family members and friends, who are considered to be in the  
7 immediate circle, it also affects neighbours, acquaintances, passers-by or  
8 professionals who knew the person (3).  
9

10  
11  
12  
13  
14  
15 When a fellow student dies, it may be the first time a student encounters the death of  
16 a peer compared to the death of a family member. This is accompanied by a range of  
17 emotional responses such as shock, depression, fear, anger and loneliness (5).  
18 Internal and external factors such as gender, sociocultural background, religious  
19 factors and belief in the afterlife contribute to the emotional responses of students  
20 following the death of a friend or family member (5, 6). A suicide on campus is a  
21 community trauma due to the unique context of a university setting where students  
22 attend the same classes, extracurricular activities, and live together. The impact of the  
23 suicide on campus is therefore considered to be more widespread than a suicide in  
24 the general population (7, 8). Students bereaved by suicide face a heightened risk for  
25 mental disorders, substance abuse and suicide (9). It is important to note that suicide  
26 bereavement can have a negative impact on physical and psychological well-being  
27 over the life-course post the period of initial loss. (10).  
28  
29  
30  
31  
32  
33  
34  
35  
36  
37

38  
39 Given that students spend most of their time at universities, staff can be considered among the  
40 bereaved who are affected by student suicide. Teachers bereaved by suicide reported significant  
41 distress and lack of support (11, 12). When a student dies, the place of work also becomes  
42 the place of loss for teachers who are now also responsible for teaching grieving  
43 students (13). Suicide bereavement significantly impacts the interpersonal  
44 relationships (partners, close friends and family) of bereaved staff and students. This  
45 includes feeling discomfort over the death due to stigma or taboo, and a loss of social  
46 confidence leading to social withdrawal. There is also the shared bereavement  
47 experience which creates closeness, although attachments are also influenced by the  
48 fear of further losses (12, 14).  
49  
50  
51  
52  
53  
54  
55  
56

57  
58 Suicide prevention strategies recommend providing postvention, which is defined as  
59 the care and support activities offered to those who have been bereaved by suicide to  
60 promote recovery and prevent adverse outcomes regarding their grief and mental

health (15-17). Five systematic reviews have been conducted on postvention interventions to date (18-22). McDaid and colleagues (20) found one study that looked at postvention interventions in three high schools and one study among undergraduate students. Szumilas and Kutcher (18) in their systematic review found six postvention intervention studies in both primary and secondary schools. The most recent systematic reviews have been by Andriessen and team both conducted in 2019 (22, 23). One of these reviews included controlled studies that evaluated the effectiveness of interventions for people bereaved by suicide (22).

Although the above reviews have evaluated postvention interventions in general, postvention interventions for university students on university campuses have not been studied. This scoping review aimed to answer the following question: “*What is known about suicide bereavement and postvention interventions for staff and students at universities?*” The term universities will be used to refer to all higher education institutions (HEI’s). The objectives of the review were to: (i) describe the impact of suicide bereavement on staff and students at universities; (ii) identify institutional responses to suicide bereavement at universities; (iii) describe postvention interventions at universities.

## METHODS

This scoping review was conducted using the Joanna Briggs Institute (JBI) guideline for scoping reviews (23) which builds on the seminal work of Arksey and O’Malley (24) as well as Levac and colleagues (25). The review is reported using the Preferred Reporting Items for Systematic Reviews and Meta-Analyses Extension for Scoping Reviews (PRISMA-ScR) checklist (26) which is congruent with the JBI guidelines. Studies were included or excluded based on the criteria in Table 1.

**Table 1. Inclusion and exclusion criteria**

| Inclusion                                                                                                          |
|--------------------------------------------------------------------------------------------------------------------|
| i. The study population consists of university/HEI students and staff                                              |
| ii. The study report data on suicide bereavement or postvention interventions for university/HEI students or staff |
| iii. The study used qualitative, quantitative or mixed methods as primary research                                 |
| iv. The study was published in English as a peer-reviewed paper                                                    |

---

### Exclusion

---

- i. The study did not involve university/HEI students or staff
  - ii. The paper does not report data suicide bereavement or postvention interventions
  - iii. The study focuses on general bereavement which includes bereavement by suicide where it is not possible to extract information specific to suicide bereavement
  - iv. The study used other methods that were not primary research such as opinion pieces, posters, book chapters or systematic reviews
- 

### Patient and public involvement

Patients or the public were not involved in the design or conduct of this scoping review. The experiences of the authors working with university students informed the need to explore the review question.

### Search Strategy

As recommended by the JBI guideline (23), a three-step search strategy was utilised. Firstly, the first author (SA) conducted a preliminary search of Academic Search Premier and PubMed to identify relevant articles in August 2021. SA consulted two expert librarians at [blinded for review] University, to develop a comprehensive search strategy using the words contained in the titles and abstracts of relevant articles and index terms used to describe articles. The search string comprised a variety of search terms connected by Boolean operators, MeSH terms, and synonyms and variant spellings. All identified keywords and index terms were included and this search string (see Table 2) was used across the following databases: Academic Search Premier, Africa-Wide Information, CINAHL, Health Source: Nursing/Academic Edition, MEDLINE, PsycINFO, PsycARTICLES, SocINDEX through the EBSCOHOST platform; Cochrane, PubMed, SCOPUS and Web of Science. In PubMed the following words were filtered using title/abstract: suicide[tiab], (postvention[tiab] , “psychosocial intervention”[tiab], "post suicide"[tiab]. The reference lists of included full-text articles as well as systematic reviews were hand searched for additional sources.



**Table 2. Search string used across databases**

| Search string                                                                                                                                                                                                                                                                                                                                                                                                                                                                                                                               |
|---------------------------------------------------------------------------------------------------------------------------------------------------------------------------------------------------------------------------------------------------------------------------------------------------------------------------------------------------------------------------------------------------------------------------------------------------------------------------------------------------------------------------------------------|
| ("college student" OR "university student" OR undergraduate OR postgraduate OR lecturer OR faculty OR "administrative staff" OR "administrative personnel" OR "support staff" OR "educational personnel") AND suicide AND (postvention OR intervention OR bereavement OR grief OR debrief OR debriefing OR "crisis intervention" OR "psychosocial intervention" OR "support after suicide" OR "survivors after suicide" OR "post suicide") AND (university OR college OR "institution of higher learning" OR campus OR "higher education"). |

### Study selection

SA conducted the searches in September 2021 and updated them in August 2022. The searches were not limited by date of publication but to publications in English. We followed two independent screening levels for selecting studies for inclusion in the review. The first level was title and abstract review and the second level, a full-text review. For the first level of review, Researcher SA uploaded all identified citations from the database searches into EndNote (27) and removed duplicates. Thereafter, SA imported all citations into Rayyan QCRI (28) and removed duplicates. Two reviewers (SA and EB) screened and selected titles and abstracts independently according to the inclusion and exclusion criteria. Twenty-nine (n=29) full-texts articles were assessed against the inclusion and exclusion criteria with 17 articles included in the final review. Ten disagreements on study selection were resolved through a consensus discussion. Figure 1. summarises the search and selection process (29).

### Data extraction

The researchers developed and piloted a Microsoft Excel data extraction form based on JBI data extraction template (23, 24), for extracting information from each study. Researcher SA extracted information on author, year, journal, affiliation, country of origin, country income group, aims, population characteristics, core data on

1  
2  
3 methodology and key findings from each of the 17 included articles. In line with the  
4 review aims, information on postvention interventions, definitions of postvention,  
5 impact of suicide bereavement, institutional responses, practice implications and  
6 recommendations for further development were also extracted. Supplementary Table  
7 1. provides an overview of the included studies.  
8  
9  
10  
11  
12

### 13 **Data synthesis**

14  
15 Data was summarised into a descriptive and narrative synthesis to answer the  
16 following questions from university settings: what postvention interventions were  
17 available, what was the impact of suicide bereavement and how universities  
18 responded suicide deaths and subsequent bereavement. Results are presented firstly  
19 as a descriptive numerical summary (25) (study characteristics) and then key findings  
20 from the different study designs.  
21  
22  
23  
24  
25  
26  
27

## 28 **RESULTS**

### 29 **Study characteristics**

30  
31 The included articles were published between 1989 and 2021 (Supplementary Table  
32 1.). Most articles (n=8) were from the USA (31, 32, 41, 49, 58, 61, 64), seven articles  
33 from the UK (30, 34-37, 53, 55) and two articles from Canada (43, 70). The study  
34 designs included ten quantitative studies (41, 43, 49, 53, 55, 58, 61, 64, 68, 70)  
35 involving the use of surveys (53, 55, 61, 64, 68); two qualitative studies (30, 31) which  
36 collected data using semi-structured interviews and five mixed-methods designs using  
37 a combination of questionnaires,(32, 34-37) interviews, (32, 37) and open-ended  
38 qualitative questions (34-37). Studies that were quantitative or had a quantitative  
39 element, used a range of existing outcome measures or developed measures to  
40 capture data on grief reactions (32, 43, 53, 55, 58, 70), impact of suicide bereavement  
41 (34-37, 41, 43, 49, 53, 55, 58, 61, 64, 68, 70) and suicidal behaviours (49).  
42  
43  
44  
45  
46  
47  
48  
49  
50  
51  
52

53 Most authors (n=13) identified participants bereaved by suicide through surveys. Two  
54 studies (32, 68) recruited students as participants to evaluate their personal responses  
55 to those bereaved by suicide. The other two studies (30, 31) were qualitative in nature  
56 and staff participants were purposively selected as those exposed to student suicide.  
57  
58  
59  
60

All the participants in the studies, were adults at HEI's and ranged between 18 and 70 years in age. Most of the studies (n=14), except one, (32) had more female participants than male participants. Two of the studies (31, 58) did not state the gender profile of the participants. Not all studies reported on the participants' relationship to the deceased (31, 32, 41, 68). Studies described the participants' suicide bereavement as almost an even split between relatives and non-relatives (34-37, 49, 53, 55, 58), apart from one study, (30) where the participants were bereaved by non-relatives. In other studies where the relationship with the deceased was described, it was unclear if this was due to suicide bereavement (43, 61, 64, 70). Many of the articles focused on the perspectives of students (n=9) (32, 41, 43, 49, 58, 61, 64, 68, 70) or both staff and student perspectives (n=6) (34-37, 53, 55) with only two (30, 31) focusing exclusively on the perspectives of staff. Most of the articles (n=16) explored the concept of suicide bereavement. We found no published articles which investigated postvention interventions in university settings.

### Key findings from included articles

Supplementary Table 1. provides a summary of the key findings of the 17 included articles. The findings are presented under the headings of: findings from qualitative studies, findings from quantitative studies and findings from mixed methods studies.

### Findings from qualitative studies

The two qualitative studies focused on the experiences of staff (30, 31) using phenomenology (31) and grounded theory (30). Staff reported physical and psychological responses that impacted their personal and professional lives. Firstly, there were the practical tasks to take care of following the death of a student, such as packing up belongings, and initiating administrative processes. Some staff reported that they began to question themselves at perhaps having missed something with the students or not having done more to prevent the suicide (30). There were varying views on support both received and accessed with staff citing that institutional processes were unsupportive to staff in a culture that values student mental well-being over staff well-being (30). Challenges identified by university administrators in responding to student suicide was the lack of postvention training received as part of their role. They also reported that it was challenging to communicate to the university community about the student death by suicide in a timeous manner before this is

1  
2  
3 communicated on social media platforms often before the family has been officially  
4 informed. University administrators spoke about their desire to honour the deceased  
5 student by having memorials on campus, while at the same time minimising the risk  
6 of suicide contagion on campus (31).  
7  
8  
9

### 10 11 12 Findings from quantitative studies

13 Students bereaved by suicide experienced higher levels of general grief reactions  
14 compared to those bereaved by other means such as natural causes or accidents (58,  
15 70). In one study, the suicide bereaved were rated with a poorer prognosis for overall  
16 recovery (61). Some participants had increased suicidal ideation or attempted suicide  
17 following their bereavement and most of them had not sought help for any episode of  
18 self-harm or suicidal ideation (55).  
19  
20  
21  
22  
23  
24  
25

26 For students bereaved by suicide, there is a need to understand the death and the  
27 reasons that led up to the deceased not wanting to continue living (49, 58, 70). It is as  
28 if they needed this explanation to make sense of the suicide. They also felt  
29 responsibility that they could have done something to prevent the suicide, and this led  
30 to feelings of guilt (49, 53, 58, 70). Some respondents felt like the deceased was  
31 punishing them by dying and felt rejected by the deceased (58, 70). The suicide  
32 bereaved had a perception that others blamed them for the death of their loved one  
33 (49).  
34  
35  
36  
37  
38  
39  
40

41 Students bereaved by suicide experience shame and embarrassment which sets them  
42 apart from other students who mourn non-suicidal deaths (58, 70) They have more  
43 perceived stigma (49, 53, 70) and often felt that the other people, especially friends,  
44 did not understand their feelings about the suicide death and did not want to talk to  
45 others about the death, putting a strain on relationships (49, 53). One study found that  
46 those bereaved by suicide were less likely to receive informal support compared to  
47 those bereaved by natural causes (55). Other respondents felt they did not receive  
48 support and that others were unhelpful (61, 64).  
49  
50  
51  
52  
53  
54  
55

### 56 57 Findings from mixed-method studies

58 As a result of their bereavement experience, suicide became an option to alleviate  
59 distress for the participants (34). The participants suddenly had a new awareness that  
60

1  
2  
3 in a state of extreme distress, they, or anyone they knew, could be vulnerable to  
4 suicide (34). Due to what the respondents had experienced, some expressed a  
5 conviction that they would not die by suicide.  
6  
7

8  
9  
10 Participants reported that they avoided using the word 'suicide' as it made other people  
11 feel uncomfortable and concealed the cause of death for the same reasons. They also  
12 felt the social pressure to no longer be affected by the suicide and so they learnt to  
13 hide their expressions of grief (35, 37). Grief following suicide bereavement impacted  
14 on participants' abilities to function in the workplace. Participants reported feeling  
15 profound sadness, confusion, anxiety, and poor concentration. This led to poor work  
16 quality, difficulty working in a team and the loss of self-confidence (36). Within work  
17 settings, suicide bereaved staff and students described institutional practices that were  
18 unsupportive to their grieving process such as systems for taking compassionate  
19 leave, additional work responsibilities because of taking time off and difficulty catching  
20 up due to decreased work capacity (36). A small group of respondents in this study by  
21 Pitman and colleagues (36) cited a positive impact of suicide bereavement. They  
22 stated that they used work as a distraction to cope with their emotions and it was also  
23 a way to make the deceased proud of them. Furthermore, the experience of suicide  
24 bereavement motivated some to change careers to careers related to mental health  
25 or caring for vulnerable persons.  
26  
27  
28  
29  
30  
31  
32  
33  
34  
35  
36  
37  
38

39 There are some respondents who reported that they received informal support from  
40 family and friends and said this support was valuable in coping with their grief (35).  
41 Aspects that participants found helpful were receiving emotional support, having an  
42 opportunity to talk about the deceased openly and not being treated differently.  
43 Responses that were helpful were those that offered reassurance, tangible support  
44 and stayed away from giving advice (35, 36). Participants also expressed the need for  
45 professional support, but very few accessed formal support (35).  
46  
47  
48  
49  
50  
51  
52

53 Staff and students bereaved by suicide felt that the way that support efforts could be  
54 enhanced would be to offer support proactively and consistently over time, especially  
55 practical support. They were also able to outline their reasons for not seeking support.  
56 These include: fear of asking for support, negative experiences of previous attempts  
57  
58  
59  
60

1  
2  
3 to access support, feeling that support would not benefit them and fearing judgement  
4 at their need for psychological support (35).  
5  
6  
7

## 8 Discussion

9  
10 We identified and appraised 17 articles that presented various aspects of suicide  
11 bereavement among university staff and students. Although we primarily sought out  
12 to explore both suicide bereavement and postvention interventions among staff and  
13 students at universities, we found literature that only focuses on suicide bereavement  
14 among staff and students conducted in high-income countries. What the results of this  
15 review mirror is the trend in postvention literature where 93% of research is  
16 concentrated in high-income countries particularly (USA, UK, Canada, Australia and  
17 Sweden) (71) when 77 percent of global suicides occur in low-and-middle-income  
18 countries (1). This indicates a gap in research and the need for more country specific  
19 studies to understand how people in different environments may experience the  
20 impact of suicide bereavement and what the needs for support may be in a specific  
21 context like a university. The experiences of staff and students within high-income  
22 country contexts, may vary vastly from experiences of staff and students in low-and-  
23 middle-income contexts and it cannot be assumed that these experiences and  
24 contexts are the same.  
25  
26  
27  
28  
29  
30  
31  
32  
33  
34  
35  
36  
37

38 A systematic mapping of postvention research over the last 50 years (71) has  
39 identified the need for more intervention studies within postvention research. This gap  
40 was also highlighted in this review as no studies on postvention interventions at  
41 universities were identified. Studies that have reviewed postvention interventions have  
42 been conducted among adolescents and schools (72-75). All the studies included in  
43 this review were descriptive in nature and most (n=15) were quantitative or mixed  
44 methods in nature. There was a gendered component to the studies that reported the  
45 gender profile of participants, as the majority had more female than male respondents  
46 which is well supported by the suicide bereavement literature (76, 77). Where the  
47 relationship to the deceased was described, there was very little difference between  
48 those bereaved by relatives versus those bereaved by non-relatives as the participants  
49 seemed to experience similar expressions of distress. Postvention literature has  
50 argued that further studies should look at the experiences of suicide bereavement of  
51 non-relatives (71).  
52  
53  
54  
55  
56  
57  
58  
59  
60

1  
2  
3 Staff and students bereaved by suicide experience higher levels of grief reactions  
4 when compared to bereavement by non-suicide deaths. This is further supported by  
5 Hay and colleague's (78) systematic review which found that grief symptoms can  
6 negatively impact on the academic and social life of bereaved students. Some  
7 participants had attempted suicide following their bereavement experience (53, 55).  
8 This is consistent with the recommendations to reduce student suicide by providing  
9 support for staff and students bereaved by suicide as with other populations (79, 80).  
10 The findings from this review demonstrate how staff have been marginalised from this  
11 research with a focus on university students. Only two studies (30, 31) focused  
12 exclusively on the experiences of staff. This bias towards studying the experiences of  
13 students is understandable, given that universities are set up for students, however, it  
14 is important to include staff as they have important support needs also.  
15  
16  
17  
18  
19  
20  
21  
22  
23  
24  
25

26 An interesting finding was that not all impacts of suicide bereavement were negative.  
27 Some participants were motivated to have a career change into more helping  
28 professions (36). What was clear from these studies is that staff and students  
29 bereaved by suicide experienced support as both helpful and unhelpful. Informal  
30 support from family and friends seemed to be the most valuable type of support  
31 received. There was a feeling though, from those bereaved that they were a burden  
32 to family and friends and so wanted to access professional support but never did so.  
33 This suggests that although those bereaved by suicide need formal support, there are  
34 still some barriers in accessing this support. Some participants articulated a few of  
35 these barriers such as fear of asking for support, doubting the usefulness of support,  
36 and negative experiences when they tried to access support in the past (35). This  
37 creates an opportunity for support measures to be enhanced and access to support  
38 improved.  
39  
40  
41  
42  
43  
44  
45  
46  
47  
48  
49

50 What seems significant to note about those bereaved by suicide is the heightened  
51 sense of the need to understand the death and reasons for the suicide to make sense  
52 of what had occurred (49, 58). There were many feelings of guilt whether they could  
53 have done something to prevent the suicide. Participants also felt that others blamed  
54 them for the death of the deceased. This was especially true for staff who felt that they  
55 had missed something or done something wrong (30, 31). This raises questions about  
56 the responsibilities and expectations placed on staff and whether these are realistic.  
57  
58  
59  
60

1  
2  
3 The findings of this scoping review need to be considered in light of some limitations.  
4 The quality of individual studies included in the review was not assessed. Data  
5 synthesis was limited to full-text peer-reviewed articles available in English.  
6  
7  
8  
9

## 10 **Conclusion**

11 This review set out to examine suicide bereavement and postvention interventions on  
12 university campuses. The review identified studies with a focus on suicide  
13 bereavement but no studies on postvention interventions on university campuses.  
14 There is a need for postvention research to move beyond descriptive studies to  
15 focusing on interventions. All the studies included in the review highlighted the current  
16 trend where the majority of postvention research is concentrated in high-income-  
17 countries. More research is needed in low-and-middle-income countries, particularly  
18 in contexts like university campuses. This review highlights how support measures for  
19 staff and students bereaved by suicided need to be strengthened due to the significant  
20 impact suicide bereavement has on their physical and psychological health as well as  
21 occupational functioning.  
22  
23  
24  
25  
26  
27  
28  
29  
30  
31

## 32 **ACKNOWLEDGEMENTS**

33 The authors would like to thank the two subject librarians from Stellenbosch University  
34 who assisted with the search strategy: Mrs Marleen Hendriksz (Faculty of Arts and  
35 Social Sciences) and Mrs Ingrid Van der Westhuizen (Faculty of Medicine and Health  
36 Sciences). Appreciation and thanks is also extended to Dr Elsie Breet as the  
37 secondary reviewer throughout the article screening and selection process.  
38  
39  
40  
41  
42  
43  
44

## 45 **AUTHOR CONTRIBUTIONS**

46 This scoping review was developed by the intellectual contributions of all the authors.  
47 All authors were involved in the developing of the review question and conceptualising  
48 the approach. SA developed and tested search terms in consultation with subject  
49 librarians. SA in consultation with JB, KA and EB developed the data extraction form.  
50 SA and EB reviewed all articles for inclusion and no discrepancies referred to third  
51 reviewer. KA and JB contributed to drafting and reviewing the manuscript prior to  
52 submission.  
53  
54  
55  
56  
57  
58  
59  
60



---

## FUNDING STATEMENT

This scoping review is supported by the funding awarded to the first author (SA) through the NRF Doctoral Scholarship. K.A. was supported by a National Health and Medical Research Council Early Career Fellowship [1157796]. The funders had no role in the design and execution of the scoping review or in the decision to submit the manuscript for publication. The work reported herein was made possible through funding by the South African Medical Research Council (SAMRC) through its Division of Research Capacity Development under the MCSP (awarded to JB). The content hereof is the sole responsibility of the authors and does not necessarily represent the official views of the SAMRC.

## COMPETING INTERESTS STATEMENT

The authors declare that they have no competing interests.

## ETHICS APPROVAL

Not required

## PATIENT CONSENT FOR PUBLICATION

Not required.

**Word Count:** 3833

## Legend

Table 1. Inclusion and exclusion criteria

Table 2. Search string used across databases

Figure 1. PRISMA Diagram

Supplementary Table 1. Articles included in the review

---

## REFERENCES

1. World Health Organization. Suicide Worldwide in 2019: Global Health Estimates. 2021 16 June 2021. Report No.: 9789240026643.
2. Andriessen K, Rahman B, Draper B, Dudley M, Mitchell PB. Prevalence of exposure to suicide: A meta-analysis of population-based studies. *Journal of Psychiatric Research*. 2017;88:113-20.
3. Cerel J, Brown MM, Maple M, Singleton M, Venne J, Moore M, et al. How Many People Are Exposed to Suicide? Not Six. *Suicide and Life-Threatening Behavior*. 2019;49(2):529-34.
4. Maple M, Sanford R. Suicide exposure and impact within a non-representative Australian community sample. *Death studies*. 2020;44(6):329-37.
5. Dorney P. The Empty Desk: The Sudden Death of a Nursing Classmate. *OMEGA-Journal of Death and Dying*. 2016;74(2):164-92.
6. Ata AW. Mental health of bereaved Muslims in Australia: religious, gender, after death communication (adc) and grief issues. *Journal of Religious Education*. 2016;64(1):47-58.
7. Leenaars LS, Leenaars AA. Suicide postvention programs in colleges and universities. In: Lamis DA, Lester D, editors. *Understanding and preventing college student suicide*. Springfield, IL: Charles C Thomas Publisher; 2011. p. 273-90.
8. Streufert BJ. Death on campuses: Common Postvention Strategies in Higher Education. *Death studies*. 2004;28(2):151-72.
9. Bartik W, Maple M, McKay K. Suicide bereavement and stigma for young people in rural Australia: a mixed methods study. *Advances in Mental Health*. 2015;13(1):84-95.
10. Kaur R, Stedmon J. A phenomenological enquiry into the impact of bereavement by suicide over the life course. *Mortality*. 2022;27(1):53-74.
11. Kölves K, Ross V, Hawgood J, Spence SH, De Leo D. The impact of a student's suicide: Teachers' perspectives. *Journal of affective disorders*. 2017;207:276-81.
12. Kim JE. Korean teachers' bereavement experience following student suicide. *Crisis*. 2019.
13. Arksey AM, Greidanus EJ. "I Could Hardly Breathe": Teachers' Lived Experiences of Bereavement After the Violent Death of a Student. *Canadian Journal of Counselling & Psychotherapy/Revue Canadienne de Counseling et de Psychothérapie*. 2022;56(1).
14. Azorina V, Morant N, Nesse H, Stevenson F, Osborn D, King M, et al. The perceived impact of suicide bereavement on specific interpersonal relationships: A qualitative study of survey data. *International journal of environmental research and public health*. 2019;16(10):1801.
15. Andriessen K. Can postvention be prevention? *Crisis*. 2009;30(1):43-7.
16. Levine H. Suicide and its impact on campus. *New directions for student services*. 2008;2008(121):63-76.
17. Trimble T, Hannigan B, Gaffney M. Suicide postvention; coping, support and transformation. *The Irish Journal of Psychology*. 2012;33(2-3):115-21.
18. Szumilas M, Kutcher S. Post-suicide intervention programs: a systematic review. *Canadian Journal of Public Health*. 2011;102(1):18-9.

19. Tøllefsen IM, Thiblin I, Helweg-Larsen K, Hem E, Kastrup M, Nyberg U, et al. Accidents and undetermined deaths: re-evaluation of nationwide samples from the Scandinavian countries. *BMC public health*. 2016;16:449.
20. van der Feltz-Cornelis CM, Sarchiapone M, Postuvan V, Volker D, Roskar S, Grum AT, et al. Best Practice Elements of Multilevel Suicide Prevention Strategies A Review of Systematic Reviews. *Crisis-The Journal of Crisis Intervention and Suicide Prevention*. 2011;32(6):319-33.
21. Andriessen K, Kryszynska K, Hill N, Reifels L, Robinson J, Reavley N, et al. Effectiveness of interventions for people bereaved through suicide: a systematic review of controlled studies of grief, psychosocial and suicide-related outcomes. *BMC psychiatry*. 2019;19(1):1-15.
22. Andriessen K, Kryszynska K, Kølves K, Reavley N. Suicide Postvention Service Models and Guidelines 2014–2019: A Systematic Review. *Frontiers in Psychology*. 2019;10(2677).
23. Peters MD, Godfrey C, Mclnerney P, Munn Z, Tricco AC, Khalil H. Chapter 11: scoping reviews (2020 version). *JBI manual for evidence synthesis*, JBI. 2020;2020.
24. Arksey H, O'Malley L. Scoping studies: towards a methodological framework. *International journal of social research methodology*. 2005;8(1):19-32.
25. Levac D, Colquhoun H, O'Brien KK. Scoping studies: advancing the methodology. *Implementation science*. 2010;5(1):1-9.
26. Tricco AC, Lillie E, Zarin W, O'Brien KK, Colquhoun H, Levac D, et al. PRISMA Extension for Scoping Reviews (PRISMA-ScR): Checklist and Explanation. *Ann Intern Med*. 2018;169(7):467-73.
27. Analytics C. Endnote version 20.2. San Francisco: Clarivate Analytics; 2021.
28. Ouzzani M, Hammady H, Fedorowicz Z, Elmagarmid A. Rayyan—a web and mobile app for systematic reviews. *Systematic reviews*. 2016;5(1):1-10.
29. Page MJ, McKenzie JE, Bossuyt PM, Boutron I, Hoffmann TC, Mulrow CD, et al. The PRISMA 2020 statement: an updated guideline for reporting systematic reviews. *Systematic reviews*. 2021;10(1):1-11.
30. Causer H, Bradley E, Muse K, Smith J. Bearing witness: A grounded theory of the experiences of staff at two United Kingdom Higher Education Institutions following a student death by suicide. *PLoS one*. 2021;16(5):e0251369.
31. Rompalo S, Parks R, Taylor A. Suicide Postvention: A Growing Challenge for Higher Education Administrators. *College and University*. 2021;96(1):63-70.
32. Allen BG, Calhoun LG, Cann A, Tedeschi RG. The effect of cause of death on responses to the bereaved: Suicide compared to accident and natural causes. *Omega: Journal of Death and Dying*. 1993;28(1):39-48.
33. Spielberger CD, Gorsuch R, Lushene R, Vagg P, Jacobs G. Manual for the state-trait anxiety inventory. Palo Alto, CA: Consulting Psychologists. 1983.
34. Pitman A, Nesse H, Morant N, Azorina V, Stevenson F, King M, et al. Attitudes to suicide following the suicide of a friend or relative: a qualitative study of the views of 429 young bereaved adults in the UK. *BMC psychiatry*. 2017;17(1):400.
35. Pitman A, De Souza T, Putri AK, Stevenson F, King M, Osborn D, et al. Support Needs and Experiences of People Bereaved by Suicide: Qualitative Findings from a Cross-Sectional British Study of Bereaved Young Adults. *International Journal of Environmental Research and Public Health*. 2018;15(4).

- 1
  - 2
  - 3
  - 4
  - 5
  - 6
  - 7
  - 8
  - 9
  - 10
  - 11
  - 12
  - 13
  - 14
  - 15
  - 16
  - 17
  - 18
  - 19
  - 20
  - 21
  - 22
  - 23
  - 24
  - 25
  - 26
  - 27
  - 28
  - 29
  - 30
  - 31
  - 32
  - 33
  - 34
  - 35
  - 36
  - 37
  - 38
  - 39
  - 40
  - 41
  - 42
  - 43
  - 44
  - 45
  - 46
  - 47
  - 48
  - 49
  - 50
  - 51
  - 52
  - 53
  - 54
  - 55
  - 56
  - 57
  - 58
  - 59
  - 60
36. Pitman A, Putri AK, De Souza T, Stevenson F, King M, Osborn D, et al. The Impact of Suicide Bereavement on Educational and Occupational Functioning: A Qualitative Study of 460 Bereaved Adults. *International Journal of Environmental Research and Public Health*. 2018;15(4).
37. Pitman AL, Stevenson F, Osborn DPJ, King MB. The stigma associated with bereavement by suicide and other sudden deaths: A qualitative interview study. *Soc Sci Med*. 2018;198:121-9.
38. Bailey SE, Kral MJ, Dunham K. Survivors of suicide do grieve differently: Empirical support for a common sense proposition. *Suicide and Life-Threatening Behavior*. 1999;29(3):256-71.
39. Barrett TW, Scott TB. Development of the grief experience questionnaire. *Suicide and Life-Threatening Behavior*. 1989;19(2):201-15.
40. Faschingbauer TR, Devaul RA, Zisook S. Development of the Texas Inventory of Grief. *The American journal of psychiatry*. 1977.
41. Balk DE, Walker AC, Baker A. Prevalence and severity of college student bereavement examined in a randomly selected sample. *Death Studies*. 2010;34(5):459-68.
42. Prigerson HG, Vanderwerker LC, Maciejewski PK. A case for inclusion of prolonged grief disorder in DSM-V. 2008.
43. Bhaskaran J, Afifi TO, Sareen J, Vincent N, Bolton JM. A cross-sectional examination of sudden-death bereavement in university students. *Journal of American College Health*. 2021:1-9.
44. Kroenke K, Spitzer RL, Williams JB. The PHQ-9: validity of a brief depression severity measure. *Journal of general internal medicine*. 2001;16(9):606-13.
45. Spitzer RL, Kroenke K, Williams JB, Löwe B. A brief measure for assessing generalized anxiety disorder: the GAD-7. *Archives of internal medicine*. 2006;166(10):1092-7.
46. Prigerson HG, Maciejewski PK, Reynolds III CF, Bierhals AJ, Newsom JT, Fasiczka A, et al. Inventory of Complicated Grief: a scale to measure maladaptive symptoms of loss. *Psychiatry research*. 1995;59(1-2):65-79.
47. Kilpatrick DG, Cogle JR, Resnick HS. Reports of the death of psychoeducation as a preventative treatment for posttraumatic psychological distress are exaggerated. *Psychiatry*. 2008;71(4):322-8.
48. DeMartini KS, Carey KB. Optimizing the use of the AUDIT for alcohol screening in college students. *Psychological assessment*. 2012;24(4):954.
49. McIntosh JL, Kelly LD. Survivors' reactions: Suicide vs other causes. *Crisis: The Journal of Crisis Intervention and Suicide Prevention*. 1992;13(2):82-93.
50. Linehan MM, Nielsen SL. Assessment of suicide ideation and parasuicide: hopelessness and social desirability. *Journal of Consulting and Clinical Psychology*. 1981;49(5):773.
51. Horowitz M, Wilner N, Alvarez W. Impact of Event Scale: A measure of subjective stress. *Psychosomatic medicine*. 1979;41(3):209-18.
52. Russell D, Peplau LA, Cutrona CE. The revised UCLA Loneliness Scale: concurrent and discriminant validity evidence. *Journal of personality and social psychology*. 1980;39(3):472.
53. Pitman AL, Osborn DP, Rantell K, King MB. The stigma perceived by people bereaved by suicide and other sudden deaths: A cross-sectional UK study of 3432 bereaved adults. *Journal of psychosomatic research*. 2016;87:22-9.
54. Bailey SE, Dunham K, Kral MJ. Factor structure of the grief experience questionnaire (Geq). *Death Studies*. 2000;24(8):721-38.

- 1
  - 2
  - 3
  - 4
  - 5
  - 6
  - 7
  - 8
  - 9
  - 10
  - 11
  - 12
  - 13
  - 14
  - 15
  - 16
  - 17
  - 18
  - 19
  - 20
  - 21
  - 22
  - 23
  - 24
  - 25
  - 26
  - 27
  - 28
  - 29
  - 30
  - 31
  - 32
  - 33
  - 34
  - 35
  - 36
  - 37
  - 38
  - 39
  - 40
  - 41
  - 42
  - 43
  - 44
  - 45
  - 46
  - 47
  - 48
  - 49
  - 50
  - 51
  - 52
  - 53
  - 54
  - 55
  - 56
  - 57
  - 58
  - 59
  - 60
55. Pitman AL, Rantell K, Moran P, Sireling L, Marston L, King M, et al. Support received after bereavement by suicide and other sudden deaths: a cross-sectional UK study of 3432 young bereaved adults. *BMJ Open*. 2017;7(5):e014487.
56. Robins LN, Wing J, Wittchen HU, Helzer JE, Babor TF, Burke J, et al. The Composite International Diagnostic Interview: an epidemiologic instrument suitable for use in conjunction with different diagnostic systems and in different cultures. *Archives of general psychiatry*. 1988;45(12):1069-77.
57. E. Bailey KD, Michael J. Kral, Steven. Factor structure of the grief experience questionnaire (GEQ). *Death studies*. 2000;24(8):721-38.
58. Silverman E, Range L, Overholser JC. Bereavement from suicide as compared to other forms of bereavement. *Omega: Journal of Death and Dying*. 1994;30(1):41-51.
59. Cohen S, Hoberman HM. Positive events and social supports as buffers of life change stress 1. *Journal of applied social psychology*. 1983;13(2):99-125.
60. Lehman DR, Ellard JH, Wortman CB. Social support for the bereaved: Recipients' and providers' perspectives on what is helpful. *Journal of consulting and clinical psychology*. 1986;54(4):438.
61. Thompson KE, Range LM. Recent bereavement from suicide and other deaths: Can people imagine it as it really is? *Omega: Journal of Death and Dying*. 1990;22(4):249-59.
62. Parkes CM. Unexpected and untimely bereavement: A statistical study of young Boston widows and widowers. *Bereavement: Its psychological aspects*. 1975:119-38.
63. Horowitz MJ, Weiss DS, Kaltreider N, Krupnick J, Marmar C, Wilner N, et al. Reactions to the death of a parent: Results from patients and field subjects. *Journal of Nervous and Mental Disease*. 1984.
64. Thompson KE, Range LM. Bereavement following suicide and other deaths - Why support attempts fail. *OMEGA-Journal of Death and Dying*. 1993;26(1):61-70.
65. Zuckerman M, Lubin B, Rinck CM. Multiple Affect Adjective Check List-- Revised. *Journal of Behavioral Assessment*. 1985.
66. Davidowitz M, Myrick RD. Responding to the bereaved: An analysis of "helping" statements. *Death Education*. 1984;8(1):1-10.
67. Wittmer J, Myrick RD. *Facilitative teaching: Theory and practice*: Goodyear Publishing Company; 1974.
68. Thornton G, Whittemore KD, Robertson DU. Evaluation of people bereaved by suicide. *Death Studies*. 1989;13(2):119-26.
69. Hammen CL, Peters SD. Differential responses to male and female depressive reactions. *Journal of Consulting and Clinical Psychology*. 1977;45(6):994.
70. Bailey SE, Kral MJ. Survivors of suicide do grieve differently: Empirical support for a common sense proposition. *Suicide & Life-Threatening Behavior*. 1999;29(3):256.
71. Maple M, Pearce T, Sanford R, Cerel J, Castelli Dransart DA, Andriessen K. A Systematic Mapping of Suicide Bereavement and Postvention Research and a Proposed Strategic Research Agenda. *Crisis*. 2018;39(4):275-82.
72. O'Neill JC, Marraccini ME, Bledsoe SE, Knotek SE, Tabori AV. Suicide postvention practices in schools: School psychologists' experiences, training, and knowledge. *School psychology*. 2020;35(1):61.

- 1
  - 2
  - 3
  - 4
  - 5
  - 6
  - 7
  - 8
  - 9
  - 10
  - 11
  - 12
  - 13
  - 14
  - 15
  - 16
  - 17
  - 18
  - 19
  - 20
  - 21
  - 22
  - 23
  - 24
  - 25
  - 26
  - 27
  - 28
  - 29
  - 30
  - 31
  - 32
  - 33
  - 34
  - 35
  - 36
  - 37
  - 38
  - 39
  - 40
  - 41
  - 42
  - 43
  - 44
  - 45
  - 46
  - 47
  - 48
  - 49
  - 50
  - 51
  - 52
  - 53
  - 54
  - 55
  - 56
  - 57
  - 58
  - 59
  - 60
- 
73. Shannonhouse L, Lin Y-WD, Shaw K, Wanna R, Porter M. Suicide intervention training for college staff: Program evaluation and intervention skill measurement. *Journal of American College Health*. 2017;65(7):450-6.
74. Shannonhouse L, Lin YWD, Shaw K, Porter M. Suicide intervention training for K–12 schools: A quasi-experimental study on ASIST. *Journal of Counseling & Development*. 2017;95(1):3-13.
75. Shilubane HN, Ruiter RA, Bos AE, Reddy PS, van den Borne B. High school students' knowledge and experience with a peer who committed or attempted suicide: a focus group study. *BMC public health*. 2014;14:1081.
76. Andriessen K, Castelli Dransart DA, Cerel J, Maple M. Current Postvention Research and Priorities for the Future. *Crisis*. 2017;38(3):202-6.
77. Andriessen K, Mowll J, Lobb E, Draper B, Dudley M, Mitchell PB. "Don't bother about me." The grief and mental health of bereaved adolescents. *Death studies*. 2018;42(10):607-15.
78. Hay A, Howell JA, Rudaizky D, Breen LJ. Experiences and Support Needs of Bereaved Students in Higher Education. *OMEGA-Journal of Death and Dying*. 2022:00302228221096565.
79. Pitman A, Osborn D, King M. Suicide bereavement and risk for suicide attempt: a national cross-sectional survey of young adults. *The Lancet*. 2014;383:S82.
80. Ross V, Kolves K, De Leo D. Exploring the support needs of people bereaved by suicide: A qualitative study. *OMEGA-Journal of death and dying*. 2021;82(4):632-45.

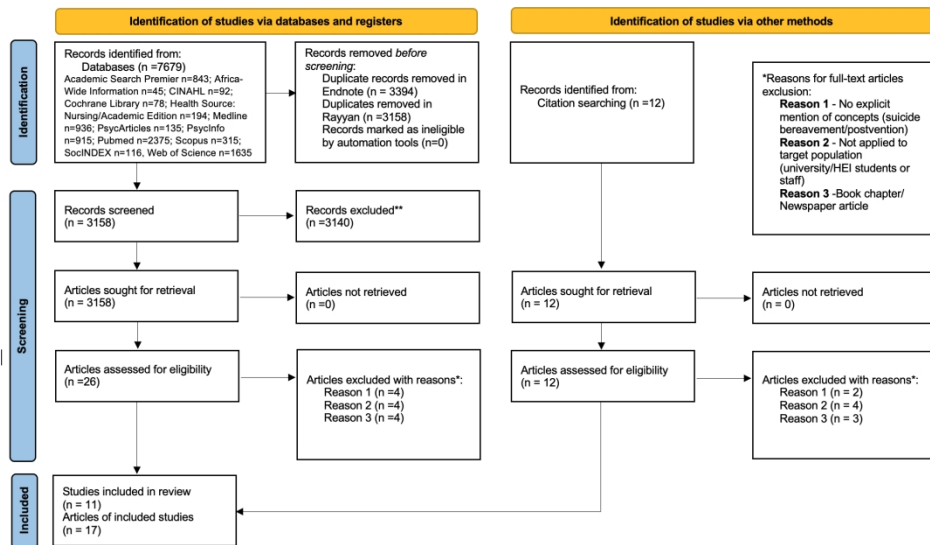

Figure 1. PRISMA Diagram

401x242mm (144 x 144 DPI)

Supplementary Table 1. Articles included in the review

| Authors<br>(year)<br>Location       | Design and methods             | Participants                                                                           | Instrument/Measures                                                 | Key Findings                                                                                                                                                                                                                                                                                                                                      |
|-------------------------------------|--------------------------------|----------------------------------------------------------------------------------------|---------------------------------------------------------------------|---------------------------------------------------------------------------------------------------------------------------------------------------------------------------------------------------------------------------------------------------------------------------------------------------------------------------------------------------|
| <b>QUALITATIVE STUDIES</b>          |                                |                                                                                        |                                                                     |                                                                                                                                                                                                                                                                                                                                                   |
| Causer et al (2021)<br>(30)<br>UK   | Qualitative<br>Grounded theory | <i>N</i> = 19 Staff at HEI's:<br><i>n</i> = 8 Male (42%)<br><i>n</i> = 11 Female (58%) | Survey and Interviews<br>developed and conducted<br>by the authors. | Staff described how in<br>"bearing witness" to student<br>suicide that all subsequent<br>experiences were shaped.<br>This included practical tasks<br>immediately following the<br>death by suicide, physical,<br>emotional and<br>psychological changes and<br>experiences of support.                                                           |
| Rompalo et al<br>(2021) (31)<br>USA | Qualitative<br>Phenomenology   | <i>N</i> = 8 student affairs<br>administrators<br><br>Gender not stated                | Online interviews                                                   | Challenges around the lack<br>of postvention training for<br>HEI administrators, the<br>difficulty of managing<br>notifications about the<br>student death before it gets<br>announced on social media<br>and the balance of<br>remembering the student<br>with a memorial while at the<br>same time minimising the<br>risk of suicide contagion. |



MIXED METHOD STUDIES

1  
2  
3  
4  
5  
6  
7  
8  
9  
10  
11  
12  
13  
14  
15  
16  
17  
18  
19  
20  
21  
22  
23  
24  
25  
26  
27  
28  
29  
30  
31  
32  
33  
34  
35  
36  
37  
38  
39  
40  
41  
42  
43  
44  
45  
46

Allen et al (1993)  
(32)

Mixed methods

*n* = 30 male (50%) *n* = 30 female (50%) undergraduate university students. Mean age 21 years. 75% Caucasian, 15% African-American, 9% other ethnicity

State-Trait Anxiety Inventory and interview (33)

Those bereaved by suicide are perceived to be different from individuals bereaved by other causes of death. Individuals bereaved by suicide are also viewed as more psychologically disturbed and more able to prevent the deaths compared to accidental or natural deaths.

USA

\*Pitman et al (2017b) (34)

Mixed methods  
(Quantitative cross-sectional; Qualitative descriptive)

*N* = 429 staff and students at British HEI's bereaved by suicide:  
Male: not stated  
Female: 82% (number not stated)  
Mean age: 25.3 years

Online questionnaire developed by the authors with 119 closed quantitative questions and 20 open ended qualitative questions. one out of 20 questions were the focus of this report.

Following their experiences of suicide bereavement, the respondents saw suicide as a tangible option, identified their shared vulnerability to suicide and made personal determination to avoid dying by suicide.

UK

\*Pitman et al (2018a) (35)

Mixed methods  
(Quantitative cross-sectional; Qualitative descriptive)

*N* = 420 staff and students at British HEI's bereaved by suicide:

Online questionnaire developed by the authors with 119 closed quantitative questions and 20 open ended qualitative questions.

In the quantitative responses, the majority of the participants (75%) reported receiving informal support from friends. 41% of those who received

UK

|    |               |                        |                                      |                              |                               |
|----|---------------|------------------------|--------------------------------------|------------------------------|-------------------------------|
| 1  |               |                        |                                      |                              |                               |
| 2  |               |                        |                                      |                              |                               |
| 3  |               |                        | <i>n</i> = 71 Male(17%)              | 2 out of 20 questions were   | support also received         |
| 4  |               |                        |                                      | the focus of this report.    | support from a mental         |
| 5  |               |                        | <i>n</i> = 349 Female (83%)          |                              | health professional. The      |
| 6  |               |                        |                                      |                              | participants were also able   |
| 7  |               |                        |                                      |                              | to describe the experience    |
| 8  |               |                        |                                      |                              | of the support received,      |
| 9  |               |                        |                                      |                              | articulate specific support   |
| 10 |               |                        |                                      |                              | needs such as proactive       |
| 11 |               |                        |                                      |                              | support, and also outline     |
| 12 |               |                        |                                      |                              | reasons for not seeking       |
| 13 |               |                        |                                      |                              | support because they          |
| 14 |               |                        |                                      |                              | believed they would not find  |
| 15 |               |                        |                                      |                              | support valuable.             |
| 16 |               |                        |                                      |                              |                               |
| 17 |               |                        |                                      |                              |                               |
| 18 |               |                        |                                      |                              |                               |
| 19 | *Pitman et al | Mixed methods          | <i>N</i> = 460 staff and students at | Online questionnaire         | The respondents bereaved      |
| 20 | (2018b) (36)  |                        | British HEI's bereaved by            | developed by the authors     | by suicide noted specific     |
| 21 |               |                        | suicide:                             | with 119 closed quantitative | aspects of grief which        |
| 22 |               | (Quantitative cross-   |                                      | questions and 20 open        | impacted on their work        |
| 23 | UK            | sectional; Qualitative | <i>n</i> = 76 Male (17%)             | ended qualitative questions. | performance in particular     |
| 24 |               | descriptive)           |                                      | 2 out of 20 questions were   | sadness, poor                 |
| 25 |               |                        | <i>n</i> = 384 Female (83%)          | the focus of this report.    | concentration, confusion      |
| 26 |               |                        |                                      |                              | and anxiety. Respondents      |
| 27 |               |                        |                                      |                              | also cited structural         |
| 28 |               |                        |                                      |                              | challenges in work and        |
| 29 |               |                        |                                      |                              | educational settings such     |
| 30 |               |                        |                                      |                              | as lack of support. A small   |
| 31 |               |                        |                                      |                              | number of respondents         |
| 32 |               |                        |                                      |                              | described positive impacts    |
| 33 |               |                        |                                      |                              | on their work outputs as      |
| 34 |               |                        |                                      |                              | they had to re-evaluate their |
| 35 |               |                        |                                      |                              | lives following suicide       |
| 36 |               |                        |                                      |                              | bereavement.                  |
| 37 |               |                        |                                      |                              |                               |
| 38 |               |                        |                                      |                              |                               |
| 39 |               |                        |                                      |                              |                               |
| 40 |               |                        |                                      |                              |                               |
| 41 |               |                        |                                      |                              |                               |
| 42 |               |                        |                                      |                              |                               |
| 43 |               |                        |                                      |                              |                               |
| 44 |               |                        |                                      |                              |                               |
| 45 |               |                        |                                      |                              |                               |
| 46 |               |                        |                                      |                              |                               |

1  
2  
3  
4  
5  
6  
7  
8  
9  
10  
11  
12  
13  
14  
15  
16  
17  
18  
19  
20  
21  
22  
23  
24  
25  
26  
27  
28  
29  
30  
31  
32  
33  
34  
35  
36  
37  
38  
39  
40  
41  
42  
43  
44  
45  
46

\*Pitman et al (2018c) (37)  
  
UK

Mixed methods  
  
(Quantitative cross-sectional; Qualitative descriptive)

*n* = 27 staff and students at British HEI's bereaved by suicide:  
  
*n* = 76 Male (17%)  
  
*n* = 384 Female (83%)

Following cross-sectional survey participants invited for face to face interview

Most of the respondents bereaved by suicide who were non-British perceived that others blamed them or their relatives and friends as being responsible for the decedent's suicide. They further described that they experienced a lack of support from both friends and professionals and this was experienced as stigmatising.

**QUANTITATIVE STUDIES**

Bailey et al (1999) (38)  
  
Canada

Quantitative  
  
Descriptive

*N* = 350 university students  
  
*n* = 259 bereaved by natural causes  
  
*n* =57 bereaved by accident  
  
*n* = 34 bereaved by suicide  
  
*n* = 90 Male (26.2%)  
  
*n* = 253 Female (73.8)  
  
*n* = 7 Other

Grief Experience Questionnaire (39)  
  
Impact of Event Scale  
Texas Revised Inventory of Grief (40)  
  
Questionnaire developed by the authors

Individuals bereaved by suicide reported feeling responsible for the person's death as compared to the other bereavements groups (accident and natural causes).

|    |                   |                 |                                    |                            |                            |
|----|-------------------|-----------------|------------------------------------|----------------------------|----------------------------|
| 1  |                   |                 | Mean age: 20.75 years              |                            |                            |
| 2  |                   |                 |                                    |                            |                            |
| 3  |                   |                 | 87.9% Caucasian                    |                            |                            |
| 4  |                   |                 |                                    |                            |                            |
| 5  |                   |                 |                                    |                            |                            |
| 6  |                   |                 |                                    |                            |                            |
| 7  |                   |                 |                                    |                            |                            |
| 8  |                   |                 |                                    |                            |                            |
| 9  | Balk et al (2010) | Quantitative    | <i>N</i> = 118 undergraduate       | Prigerson et al. (2008)    | In this sample of          |
| 10 | (41)              |                 | university students:               | revised and shortened the  | undergraduate students,    |
| 11 |                   | Cross-sectional |                                    | Inventory for Traumatic    | four of the decedents died |
| 12 | USA               |                 | <i>n</i> = 31 bereaved by natural  | Grief into a 13-item       | by suicide.                |
| 13 |                   |                 | causes                             | questionnaire that can be  |                            |
| 14 |                   |                 |                                    | used to measure            |                            |
| 15 |                   |                 | <i>n</i> = 8 bereaved by accident  | complicated grief and      |                            |
| 16 |                   |                 |                                    | diagnose prolonged grief   |                            |
| 17 |                   |                 | <i>n</i> = 6 bereaved by murder    | disorder (42).             |                            |
| 18 |                   |                 |                                    |                            |                            |
| 19 |                   |                 | <i>n</i> = 4 bereaved by suicide   | Demographic and            |                            |
| 20 |                   |                 |                                    | background questionnaire   |                            |
| 21 |                   |                 | Male: 41% (number not              | developed by the authors   |                            |
| 22 |                   |                 | stated)                            |                            |                            |
| 23 |                   |                 |                                    |                            |                            |
| 24 |                   |                 | Female: 59% (number not            |                            |                            |
| 25 |                   |                 | stated)                            |                            |                            |
| 26 |                   |                 |                                    |                            |                            |
| 27 |                   |                 | 94% Protestants (number not        |                            |                            |
| 28 |                   |                 | stated)                            |                            |                            |
| 29 |                   |                 |                                    |                            |                            |
| 30 |                   |                 | 69% Caucasian (number not          |                            |                            |
| 31 |                   |                 | stated)                            |                            |                            |
| 32 |                   |                 |                                    |                            |                            |
| 33 | Bhaskaran et al   | Quantitative    | <i>N</i> = 964 bereaved university | Patient Health             | 75 out of 964 deaths were  |
| 34 | (2021) (43)       |                 | students:                          | Questionnaire (PHQ-9) (44) | due to suicide. Suicide is |
| 35 |                   | Cross-sectional |                                    |                            | categorised under sudden   |
| 36 | Canada            |                 | <i>n</i> = 322 Male (33.4%)        | Generalized Anxiety        | death bereavement.         |
| 37 |                   |                 |                                    | Disorder Assessment-7      | Sudden death bereavement   |
| 38 |                   |                 | <i>n</i> = 632 Female (65.6%)      | (GAD-7) (45)               | was associated with        |
| 39 |                   |                 |                                    |                            | increased likelihood of    |
| 40 |                   |                 |                                    |                            |                            |
| 41 |                   |                 |                                    |                            |                            |
| 42 |                   |                 |                                    |                            |                            |
| 43 |                   |                 |                                    |                            |                            |
| 44 |                   |                 |                                    |                            |                            |
| 45 |                   |                 |                                    |                            |                            |
| 46 |                   |                 |                                    |                            |                            |

1  
2  
3  
4  
5  
6  
7  
8  
9  
10  
11  
12  
13  
14  
15  
16  
17  
18  
19  
20  
21  
22  
23  
24  
25  
26  
27  
28  
29  
30  
31  
32  
33  
34  
35  
36  
37  
38  
39  
40  
41  
42  
43  
44  
45  
46

|                              |                 |                                                                                                                                 |                                                                                                          |                                                                                                                                                                                                                                                                                                                           |
|------------------------------|-----------------|---------------------------------------------------------------------------------------------------------------------------------|----------------------------------------------------------------------------------------------------------|---------------------------------------------------------------------------------------------------------------------------------------------------------------------------------------------------------------------------------------------------------------------------------------------------------------------------|
|                              |                 | <i>n</i> = 134 bereaved through accidents:<br><i>n</i> = 20 bereaved through homicide<br><i>n</i> = 75 bereaved through suicide | Inventory of Complicated Grief (ICG) (46)<br><br>National Stressful Events PTSD Short Scale (NSESS) (47) | complicated grief symptomatology and increased likelihood of generalised anxiety disorder.                                                                                                                                                                                                                                |
|                              |                 | <i>n</i> = 648 bereaved through illness                                                                                         | The alcohol use disorders identification test (AUDIT) (48)                                               |                                                                                                                                                                                                                                                                                                                           |
|                              |                 | <i>n</i> = 87 bereaved through unknown causes                                                                                   |                                                                                                          |                                                                                                                                                                                                                                                                                                                           |
| McIntosh & Kelly (1992) (49) | Quantitative    | <i>N</i> = 174 university students:                                                                                             | Demographic questionnaire developed by authors                                                           | Those bereaved by suicide and accidents felt a greater need to understand the death. 87 percent of those bereaved by suicide also indicated that they felt stigmatised by others. There was no difference to the guilt felt by those bereaved by suicide when compared to those bereaved by natural causes and accidents. |
| USA                          | Cross-sectional | <i>n</i> = 63 bereaved by natural causes                                                                                        | Suicidal Behaviors Questionnaire (50)                                                                    |                                                                                                                                                                                                                                                                                                                           |
|                              |                 | <i>n</i> = 71 bereaved by accidents                                                                                             | Impact of Event Scale (51)                                                                               |                                                                                                                                                                                                                                                                                                                           |
|                              |                 | <i>n</i> = 40 bereaved by suicide                                                                                               | Revised UCLA Loneliness Scale (52)                                                                       |                                                                                                                                                                                                                                                                                                                           |
|                              |                 | Mean age: 27.9 years                                                                                                            | Texas Revised Inventory of Grief (TRIG) (40)                                                             |                                                                                                                                                                                                                                                                                                                           |
|                              |                 | <i>n</i> = 55 Male (32%)<br><i>n</i> = 119 Female (68%)                                                                         |                                                                                                          |                                                                                                                                                                                                                                                                                                                           |
| *Pitman et al (2016) (53)    | Quantitative    | <i>N</i> = 3432 HEI staff and students who had experienced a sudden bereavement of a close contact.                             | Online questionnaire developed by the authors.                                                           | The group of those bereaved by suicide had higher shame, stigma, guilt and responsibility scores                                                                                                                                                                                                                          |
| UK                           | Cross-sectional |                                                                                                                                 | 10-item stigmatization                                                                                   |                                                                                                                                                                                                                                                                                                                           |

|    |                 |                 |                                        |                              |                               |
|----|-----------------|-----------------|----------------------------------------|------------------------------|-------------------------------|
| 1  |                 |                 |                                        |                              |                               |
| 2  |                 |                 |                                        |                              |                               |
| 3  |                 |                 | <i>n</i> = 2106 bereaved by natural    | subscale of the Grief        | when compared to those        |
| 4  |                 |                 | causes                                 | Experience Questionnaire     | bereaved by other means.      |
| 5  |                 |                 |                                        | (GEQ) (54).                  |                               |
| 6  |                 |                 | <i>n</i> = 712 bereaved by sudden      | Secondary measures three     |                               |
| 7  |                 |                 | unnatural causes                       | related GEQ subscales:       |                               |
| 8  |                 |                 |                                        | shame, responsibility and    |                               |
| 9  |                 |                 | <i>n</i> = 614 bereaved by suicide     | guilt (39)                   |                               |
| 10 |                 |                 |                                        |                              |                               |
| 11 |                 |                 | <i>n</i> = 648 Males (19%)             |                              |                               |
| 12 |                 |                 |                                        |                              |                               |
| 13 |                 |                 | <i>n</i> = 2784 Females (81%)          |                              |                               |
| 14 |                 |                 |                                        |                              |                               |
| 15 |                 |                 |                                        |                              |                               |
| 16 |                 |                 |                                        |                              |                               |
| 17 | *Pitman et al   | Quantitative    | <i>N</i> = 3432 HEI staff and students | Online questionnaire         | Individuals bereaved by       |
| 18 | (2017a) (55)    |                 | who had experienced a sudden           | developed by the authors to  | suicide were significantly    |
| 19 |                 | Cross-sectional | bereavement of a close contact.        | elicit quantitative data on  | less likely to receive        |
| 20 | UK              |                 |                                        | sociodemographic and         | informal support compared     |
| 21 |                 |                 | <i>n</i> = 2106 bereaved by natural    | clinical characteristics.    | to those bereaved by          |
| 22 |                 |                 | causes                                 |                              | natural causes and likely to  |
| 23 |                 |                 |                                        | Composite International      | report delayed receipt of     |
| 24 |                 |                 | <i>n</i> = 712 bereaved by sudden      | Diagnostic Interview screen  | support. In this sample 25    |
| 25 |                 |                 | unnatural causes                       | for lifetime depression (56) | percent (one in four) people  |
| 26 |                 |                 |                                        |                              | bereaved by suicide had       |
| 27 |                 |                 | <i>n</i> = 614 bereaved by suicide     | Stigma subscale of the       | received no formal or         |
| 28 |                 |                 |                                        | Grief Experience             | informal support. 6 percent   |
| 29 |                 |                 | <i>n</i> = 648 Males (19%)             | Questionnaire (57)           | of the sample bereaved by     |
| 30 |                 |                 |                                        |                              | suicide reported attempting   |
| 31 |                 |                 | <i>n</i> = 2784 Females (81%)          |                              | suicide since the             |
| 32 |                 |                 |                                        |                              | bereavement.                  |
| 33 |                 |                 |                                        |                              |                               |
| 34 |                 |                 |                                        |                              |                               |
| 35 | Silverman et al | Quantitative    | <i>N</i> = 55 college students         | Grief Experience             | Those bereaved by suicide     |
| 36 | (1994) (58)     |                 | bereaved in the last 5 years           | Questionnaires (39)          | reported higher levels of     |
| 37 |                 | Cross-sectional |                                        |                              | general grief, loss of social |
| 38 | USA             |                 |                                        |                              | support, stigma and feeling   |
| 39 |                 |                 |                                        |                              | responsible for the death.    |
| 40 |                 |                 |                                        |                              |                               |
| 41 |                 |                 |                                        |                              |                               |
| 42 |                 |                 |                                        |                              |                               |
| 43 |                 |                 |                                        |                              |                               |
| 44 |                 |                 |                                        |                              |                               |
| 45 |                 |                 |                                        |                              |                               |
| 46 |                 |                 |                                        |                              |                               |

1  
2  
3  
4  
5  
6  
7  
8  
9  
10  
11  
12  
13  
14  
15  
16  
17  
18  
19  
20  
21  
22  
23  
24  
25  
26  
27  
28  
29  
30  
31  
32  
33  
34  
35  
36  
37  
38  
39  
40  
41  
42  
43  
44  
45  
46

For Peer Review Only

|                              |              |                                                       |                                                        |                                                                                                                |
|------------------------------|--------------|-------------------------------------------------------|--------------------------------------------------------|----------------------------------------------------------------------------------------------------------------|
|                              |              | <i>n</i> = 12 bereaved by natural anticipated causes  | Interpersonal Support Evaluation List (59)             | They also experienced a greater need for an explanation about the cause of death.                              |
|                              |              | <i>n</i> = 9 bereaved by natural unanticipated causes | Impact of Event Scale (51)                             |                                                                                                                |
|                              |              | <i>n</i> = 16 bereaved by accident                    | Grief Recovery Questions (60)                          |                                                                                                                |
|                              |              | <i>n</i> = 9 bereaved suicide                         |                                                        |                                                                                                                |
|                              |              | <i>n</i> = 9 bereaved by homicide                     |                                                        |                                                                                                                |
|                              |              | Gender not stated                                     |                                                        |                                                                                                                |
| Thompson & Range (1990) (61) | Quantitative | <i>N</i> = 92 undergraduate college students          | Impact of Event Scale (51)                             | Non-bereaved participants imagined those bereaved by suicide as receiving more support than actually occurred. |
| USA                          | Yoked design | <i>n</i> = 10 death by suicide                        | Scale for Prediction of Outcome after Bereavement (62) |                                                                                                                |
|                              |              | <i>n</i> = 11 death by accident                       | Perceived Social Support Scale (63)                    |                                                                                                                |
|                              |              | <i>n</i> = 12 Death by anticipated natural causes     |                                                        |                                                                                                                |
|                              |              | <i>n</i> = 13 death by unanticipated natural causes   |                                                        |                                                                                                                |
|                              |              | Mean age: 20.25 years.                                |                                                        |                                                                                                                |
|                              |              | <i>n</i> = 36 Male (39%)                              |                                                        |                                                                                                                |
|                              |              | <i>n</i> = 56 Female (61%)                            |                                                        |                                                                                                                |

|    |                  |              |                                       |                             |                         |
|----|------------------|--------------|---------------------------------------|-----------------------------|-------------------------|
| 1  |                  |              |                                       |                             |                         |
| 2  |                  |              |                                       |                             |                         |
| 3  | Thompson & Range | Quantitative | <i>N</i> = 112 undergraduate college  | Impact of Event Scale (51)  | Individuals bereaved by |
| 4  | (1993) (64)      |              | students                              |                             |                         |
| 5  |                  | Yoked design | <i>n</i> = 18 bereaved by suicide     | Multiple Affect Adjective   |                         |
| 6  | USA              |              |                                       | Check List-Revised          |                         |
| 7  |                  |              | <i>n</i> = 13 bereaved by accident    | Perceived Recovery (65)     |                         |
| 8  |                  |              |                                       | Interpersonal Support       |                         |
| 9  |                  |              | <i>n</i> = 10 bereaved by anticipated | Evaluation List (59)        |                         |
| 10 |                  |              | natural causes                        | Perceived Recovery (62)     |                         |
| 11 |                  |              | <i>n</i> = 10 bereaved by             | Perceived Social Support    |                         |
| 12 |                  |              | unanticipated natural causes          | Scale (63)                  |                         |
| 13 |                  |              | <i>n</i> = 5 bereaved by homicide     | Helpful/Unhelpful Support   |                         |
| 14 |                  |              | Mean age: 20.5 years old              | (66)                        |                         |
| 15 |                  |              | <i>n</i> = 32 Male (29%)              | Theoretically based         |                         |
| 16 |                  |              | <i>n</i> = 80 Female (71%)            | guidelines for scoring      |                         |
| 17 |                  |              | An Imagined Group ( <i>n</i> =56      | facilitativeness of support |                         |
| 18 |                  |              | potential comforters) reported        | developed from interviews   |                         |
| 19 |                  |              | no bereavement within the past        | with bereaved persons (67)  |                         |
| 20 |                  |              | two years and no experience of        |                             |                         |
| 21 |                  |              | comforting a bereaved person in       |                             |                         |
| 22 |                  |              | the past year. Each person was        |                             |                         |
| 23 |                  |              | individually matched on gender        |                             |                         |
| 24 |                  |              | and age to a bereaved person.         |                             |                         |
| 25 |                  |              |                                       |                             |                         |
| 26 |                  |              |                                       |                             |                         |
| 27 |                  |              |                                       |                             |                         |
| 28 |                  |              |                                       |                             |                         |
| 29 |                  |              |                                       |                             |                         |
| 30 |                  |              |                                       |                             |                         |
| 31 |                  |              |                                       |                             |                         |
| 32 |                  |              |                                       |                             |                         |
| 33 |                  |              |                                       |                             |                         |
| 34 |                  |              |                                       |                             |                         |
| 35 |                  |              |                                       |                             |                         |
| 36 |                  |              |                                       |                             |                         |
| 37 |                  |              |                                       |                             |                         |
| 38 |                  |              |                                       |                             |                         |
| 39 |                  |              |                                       |                             |                         |
| 40 |                  |              |                                       |                             |                         |
| 41 |                  |              |                                       |                             |                         |
| 42 |                  |              |                                       |                             |                         |
| 43 |                  |              |                                       |                             |                         |
| 44 |                  |              |                                       |                             |                         |
| 45 |                  |              |                                       |                             |                         |
| 46 |                  |              |                                       |                             |                         |



1  
2  
3  
4  
5  
6  
7  
8  
9  
10  
11  
12  
13  
14  
15  
16  
17  
18  
19  
20  
21  
22  
23  
24  
25  
26  
27  
28  
29  
30  
31  
32  
33  
34  
35  
36  
37  
38  
39  
40  
41  
42  
43  
44  
45  
46

|                            |              |                                                            |                                                                                           |                                                                                                                                                                                                   |
|----------------------------|--------------|------------------------------------------------------------|-------------------------------------------------------------------------------------------|---------------------------------------------------------------------------------------------------------------------------------------------------------------------------------------------------|
| Thornton et al (1989) (68) | Quantitative | <i>N</i> = 89 undergraduate university students            | Personal and social role functioning questions adapted from Hammen and Peters (1979) (69) | When death was caused by suicide males were perceived better as a close friend or club member than females. When a child or adolescent died by suicide, more blame was attributed to the griever. |
| USA                        | Descriptive  | <i>n</i> = 28 Male (31%)<br><br><i>n</i> = 61 Female (69%) |                                                                                           | The participants perceived the deceased was as having been more psychologically unstable when death was by suicide rather than by illness.                                                        |

For peer review only

**\*Note: these six articles are part of a single study by Pitman and colleagues**

## Preferred Reporting Items for Systematic reviews and Meta-Analyses extension for Scoping Reviews (PRISMA-ScR) Checklist

| SECTION                                               | ITEM | PRISMA-ScR CHECKLIST ITEM                                                                                                                                                                                                                                                                                  | REPORTED ON PAGE # |
|-------------------------------------------------------|------|------------------------------------------------------------------------------------------------------------------------------------------------------------------------------------------------------------------------------------------------------------------------------------------------------------|--------------------|
| <b>TITLE</b>                                          |      |                                                                                                                                                                                                                                                                                                            |                    |
| Title                                                 | 1    | Identify the report as a scoping review.                                                                                                                                                                                                                                                                   | 1                  |
| <b>ABSTRACT</b>                                       |      |                                                                                                                                                                                                                                                                                                            |                    |
| Structured summary                                    | 2    | Provide a structured summary that includes (as applicable): background, objectives, eligibility criteria, sources of evidence, charting methods, results, and conclusions that relate to the review questions and objectives.                                                                              | 1, 2               |
| <b>INTRODUCTION</b>                                   |      |                                                                                                                                                                                                                                                                                                            |                    |
| Rationale                                             | 3    | Describe the rationale for the review in the context of what is already known. Explain why the review questions/objectives lend themselves to a scoping review approach.                                                                                                                                   | 2, 3, 4            |
| Objectives                                            | 4    | Provide an explicit statement of the questions and objectives being addressed with reference to their key elements (e.g., population or participants, concepts, and context) or other relevant key elements used to conceptualize the review questions and/or objectives.                                  | 4                  |
| <b>METHODS</b>                                        |      |                                                                                                                                                                                                                                                                                                            |                    |
| Protocol and registration                             | 5    | Indicate whether a review protocol exists; state if and where it can be accessed (e.g., a Web address); and if available, provide registration information, including the registration number.                                                                                                             | NA                 |
| Eligibility criteria                                  | 6    | Specify characteristics of the sources of evidence used as eligibility criteria (e.g., years considered, language, and publication status), and provide a rationale.                                                                                                                                       | 5                  |
| Information sources*                                  | 7    | Describe all information sources in the search (e.g., databases with dates of coverage and contact with authors to identify additional sources), as well as the date the most recent search was executed.                                                                                                  | 4, 5               |
| Search                                                | 8    | Present the full electronic search strategy for at least 1 database, including any limits used, such that it could be repeated.                                                                                                                                                                            | 4, 5               |
| Selection of sources of evidence†                     | 9    | State the process for selecting sources of evidence (i.e., screening and eligibility) included in the scoping review.                                                                                                                                                                                      | 5                  |
| Data charting process‡                                | 10   | Describe the methods of charting data from the included sources of evidence (e.g., calibrated forms or forms that have been tested by the team before their use, and whether data charting was done independently or in duplicate) and any processes for obtaining and confirming data from investigators. | 5, 6               |
| Data items                                            | 11   | List and define all variables for which data were sought and any assumptions and simplifications made.                                                                                                                                                                                                     | 5, 6               |
| Critical appraisal of individual sources of evidence§ | 12   | If done, provide a rationale for conducting a critical appraisal of included sources of evidence; describe the methods used and how this information was used in any data synthesis (if appropriate).                                                                                                      | NA                 |

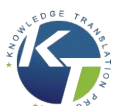

| SECTION                                       | ITEM | PRISMA-ScR CHECKLIST ITEM                                                                                                                                                                       | REPORTED ON PAGE # |
|-----------------------------------------------|------|-------------------------------------------------------------------------------------------------------------------------------------------------------------------------------------------------|--------------------|
| Synthesis of results                          | 13   | Describe the methods of handling and summarizing the data that were charted.                                                                                                                    | 6                  |
| <b>RESULTS</b>                                |      |                                                                                                                                                                                                 |                    |
| Selection of sources of evidence              | 14   | Give numbers of sources of evidence screened, assessed for eligibility, and included in the review, with reasons for exclusions at each stage, ideally using a flow diagram.                    | 6, 7               |
| Characteristics of sources of evidence        | 15   | For each source of evidence, present characteristics for which data were charted and provide the citations.                                                                                     | 6, 7               |
| Critical appraisal within sources of evidence | 16   | If done, present data on critical appraisal of included sources of evidence (see item 12).                                                                                                      | 7, 8, 9            |
| Results of individual sources of evidence     | 17   | For each included source of evidence, present the relevant data that were charted that relate to the review questions and objectives.                                                           | 7, 8, 9            |
| Synthesis of results                          | 18   | Summarize and/or present the charting results as they relate to the review questions and objectives.                                                                                            | 7, 8, 9            |
| <b>DISCUSSION</b>                             |      |                                                                                                                                                                                                 |                    |
| Summary of evidence                           | 19   | Summarize the main results (including an overview of concepts, themes, and types of evidence available), link to the review questions and objectives, and consider the relevance to key groups. | 10, 11             |
| Limitations                                   | 20   | Discuss the limitations of the scoping review process.                                                                                                                                          | 11, 12             |
| Conclusions                                   | 21   | Provide a general interpretation of the results with respect to the review questions and objectives, as well as potential implications and/or next steps.                                       | 12                 |
| <b>FUNDING</b>                                |      |                                                                                                                                                                                                 |                    |
| Funding                                       | 22   | Describe sources of funding for the included sources of evidence, as well as sources of funding for the scoping review. Describe the role of the funders of the scoping review.                 | 13                 |

JBI = Joanna Briggs Institute; PRISMA-ScR = Preferred Reporting Items for Systematic reviews and Meta-Analyses extension for Scoping Reviews.

\* Where *sources of evidence* (see second footnote) are compiled from, such as bibliographic databases, social media platforms, and Web sites.

† A more inclusive/heterogeneous term used to account for the different types of evidence or data sources (e.g., quantitative and/or qualitative research, expert opinion, and policy documents) that may be eligible in a scoping review as opposed to only studies. This is not to be confused with *information sources* (see first footnote).

‡ The frameworks by Arksey and O'Malley (6) and Levac and colleagues (7) and the JBI guidance (4, 5) refer to the process of data extraction in a scoping review as data charting.

§ The process of systematically examining research evidence to assess its validity, results, and relevance before using it to inform a decision. This term is used for items 12 and 19 instead of "risk of bias" (which is more applicable to systematic reviews of interventions) to include and acknowledge the various sources of evidence that may be used in a scoping review (e.g., quantitative and/or qualitative research, expert opinion, and policy document).

From: Tricco AC, Lillie E, Zarin W, O'Brien KK, Colquhoun H, Levac D, et al. PRISMA Extension for Scoping Reviews (PRISMA-ScR): Checklist and Explanation. *Ann Intern Med.* 2018;169:467–473. doi: 10.7326/M18-0850.

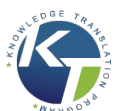

St. Michael's

Inspired Care.  
Inspiring Science.

For peer review only - <http://bmjopen.bmj.com/site/about/guidelines.xhtml>

# BMJ Open

## Suicide postvention for staff and students on university campuses: A scoping review

|                                 |                                                                                                                                                                                                                                                                                                                                                         |
|---------------------------------|---------------------------------------------------------------------------------------------------------------------------------------------------------------------------------------------------------------------------------------------------------------------------------------------------------------------------------------------------------|
| Journal:                        | <i>BMJ Open</i>                                                                                                                                                                                                                                                                                                                                         |
| Manuscript ID                   | bmjopen-2022-068730.R1                                                                                                                                                                                                                                                                                                                                  |
| Article Type:                   | Original research                                                                                                                                                                                                                                                                                                                                       |
| Date Submitted by the Author:   | 31-Mar-2023                                                                                                                                                                                                                                                                                                                                             |
| Complete List of Authors:       | Allie, Sophia-Lorraine; Stellenbosch University, Psychology<br>Bantjes, Jason; South African Medical Research Council, Alcohol, Tobacco and Other Drug Research Unit; Stellenbosch University, Department of Global Health<br>Andriessen, Karl; The University of Melbourne, Centre for Mental Health, Melbourne School of Population and Global Health |
| <b>Primary Subject Heading</b>: | Mental health                                                                                                                                                                                                                                                                                                                                           |
| Secondary Subject Heading:      | Public health, Health policy                                                                                                                                                                                                                                                                                                                            |
| Keywords:                       | Suicide & self-harm < PSYCHIATRY, EDUCATION & TRAINING (see Medical Education & Training), Adult psychiatry < PSYCHIATRY                                                                                                                                                                                                                                |
|                                 |                                                                                                                                                                                                                                                                                                                                                         |

SCHOLARONE™  
Manuscripts



I, the Submitting Author has the right to grant and does grant on behalf of all authors of the Work (as defined in the below author licence), an exclusive licence and/or a non-exclusive licence for contributions from authors who are: i) UK Crown employees; ii) where BMJ has agreed a CC-BY licence shall apply, and/or iii) in accordance with the terms applicable for US Federal Government officers or employees acting as part of their official duties; on a worldwide, perpetual, irrevocable, royalty-free basis to BMJ Publishing Group Ltd ("BMJ") its licensees and where the relevant Journal is co-owned by BMJ to the co-owners of the Journal, to publish the Work in this journal and any other BMJ products and to exploit all rights, as set out in our [licence](#).

The Submitting Author accepts and understands that any supply made under these terms is made by BMJ to the Submitting Author unless you are acting as an employee on behalf of your employer or a postgraduate student of an affiliated institution which is paying any applicable article publishing charge ("APC") for Open Access articles. Where the Submitting Author wishes to make the Work available on an Open Access basis (and intends to pay the relevant APC), the terms of reuse of such Open Access shall be governed by a Creative Commons licence – details of these licences and which [Creative Commons](#) licence will apply to this Work are set out in our licence referred to above.

Other than as permitted in any relevant BMJ Author's Self Archiving Policies, I confirm this Work has not been accepted for publication elsewhere, is not being considered for publication elsewhere and does not duplicate material already published. I confirm all authors consent to publication of this Work and authorise the granting of this licence.

---

# Suicide postvention for staff and students on university campuses: A scoping review

## AUTHORS

Sophia-Lorraine Allie<sup>1</sup> Jason Bantjes<sup>2,3,4</sup> Karl Andriessen<sup>5</sup>

1. Department of Psychology, Faculty of Arts and Social Sciences, Stellenbosch University, Stellenbosch, South Africa.

2. Alcohol, Tobacco and Other Drug Research Unit, South African Medical Research Council.

3. Department of Global Health, Faculty of Medicine and Health Sciences, Stellenbosch University.

4. Dept of Psychiatry and Mental Health, University of Cape Town, South Africa.

5. Centre for Mental Health, Melbourne School of Population and Global Health, The University of Melbourne, Melbourne, Australia.

Corresponding author: Sophia-Lorraine Allie, Department of Psychology, Faculty of Arts and Social Sciences, Stellenbosch University, Stellenbosch, South Africa.

[sophialorraine.allie@gmail.com](mailto:sophialorraine.allie@gmail.com) / [21725411@sun.ac.za](mailto:21725411@sun.ac.za)

## ABSTRACT

**Objective:** To examine current knowledge about suicide bereavement and postvention interventions for university staff and students.

**Design:** Scoping review

**Data sources and eligibility:** We conducted systematic searches in 12 electronic databases (PubMed, PsycINFO, MEDLINE, CINAHL, Africa-Wide Information, PsycARTICLES, Health Source: Nursing/Academic Edition, Academic Search Premier, SocINDEX through the EBSCOHOST platform; Cochrane Library, Web of Science, SCOPUS), hand searched lists of references of included articles, and

1  
2  
3 consulted with library experts during September 2021 and June 2022. Eligible studies  
4 were screened against the inclusion criteria independently by two reviewers. Only  
5 studies published in English were included.  
6  
7

8  
9 **Data extraction and synthesis:** Screening was conducted by two independent  
10 reviewers following a 3-step article screening process. Biographical data and study  
11 characteristics were extracted using a data extraction form and synthesised.  
12  
13

14  
15 **Results:** Our search strategy identified 7691 records from which 3170 abstracts were  
16 screened. We assessed 29 full texts and included 17 articles for the scoping review.  
17 All studies were from high-income countries (United States of America, Canada,  
18 United Kingdom). The review identified no postvention intervention studies on  
19 university campuses. Study designs were mostly descriptive quantitative, or mixed  
20 methods. Data collection and sampling were heterogeneous.  
21  
22  
23  
24  
25

26  
27 **Conclusion:** Staff and students require support measures due to the impact of suicide  
28 bereavement and the unique nature of the university context. There is a need for  
29 further research to move from descriptive studies to focus on intervention studies,  
30 particularly at universities in low-and-middle-income countries.  
31  
32  
33

## 34 35 36 37 38 **STRENGTHS AND LIMITATIONS OF THIS STUDY**

- 39 • The review focused on postvention interventions for both staff and students on  
40 university campuses globally.
- 41 • This scoping review was based on a robust methodology for conducting  
42 scoping reviews.
- 43 • The selection process of eligible articles and data extraction was conducted  
44 independently by two researchers.
- 45 • The review provides a synthesis and critical examination of the postvention  
46 research and practice on university campuses.
- 47 • The scoping review was limited to peer-reviewed articles and primary studies  
48 published in English where grey literature was excluded.  
49  
50  
51  
52  
53  
54  
55  
56  
57  
58  
59  
60

---

## INTRODUCTION

Despite the decrease in suicide rates globally (1), there has been an increase in suicide among university students in recent years (2, 3). There is a growing concern over the mental health of university students, with various studies identifying that mental disorders and suicide are higher among university students than the general population (4-9). Suicide has been identified as the fourth leading cause of death among 15 to 29-year-olds globally (1). Pillay (2) identified that suicide risk is greatest among students when they face challenges in multiple areas. Some risk factors for student suicide include being black/belonging to a minority group; non-heteronormative sexual orientation; poor socio-economic background; mental disorders; academic pressure, and financial concerns (2, 5, 10, 11).

The transition to university life coincides with the transition into adulthood, which comes with various challenges and stressors for students, such as leaving home for the first time, financial concerns, including balancing employment with academic demands (3, 12, 13). Although changes to the higher education sector mean that not all students attend residential universities and live on campus (14, 15), some students spend most of their time on campus, especially if they are in residential accommodation (14, 15). Given this context, a suicide on campus can be experienced as a community trauma and may be the first time a student encounters a peer's death compared to a family member's death (14). Students may experience a range of emotional responses, such as shock, depression, fear, anger and loneliness (14). Internal and external factors such as gender, sociocultural background, religious factors and belief in the afterlife contribute to these emotional responses (14, 15).

Literature often refers to those bereaved by suicide as "suicide survivors" or "survivors of suicide" to describe those who have been bereaved by suicide (16-19). We intentionally chose to use the descriptor "students bereaved by suicide" and its variations to improve clarity. Students bereaved by suicide face a heightened risk for mental disorders, substance use and suicide (20). Suicide bereavement can have a negative impact on physical and psychological well-being over the life-course, such as increased risk of depression and death by suicide (21). The impact of suicide on



1  
2  
3 campus is therefore considered more widespread than a suicide in the general  
4 population (22, 23).  
5  
6

7  
8 Since students spend most of their time at universities, staff can be considered among the  
9 bereaved affected by student suicide. Although there is a dearth of research on the impact of  
10 suicide on university staff, research in schools shows that teachers bereaved by suicide reported  
11 significant distress and lack of support (24, 25). When a student dies, the place of work  
12 becomes the place of loss for teaching staff who are now also responsible for teaching  
13 grieving students (26). Suicide bereavement significantly impacts bereaved staff and  
14 students' interpersonal relationships (partners, close friends and family). This includes  
15 feeling discomfort over the death due to stigma or taboo, and a loss of social  
16 confidence leading to social withdrawal (25, 27).  
17  
18  
19  
20  
21  
22  
23

24  
25 Suicide prevention strategies recommend providing postvention, defined as the care  
26 and support activities offered to those who have been bereaved by suicide to promote  
27 recovery and prevent adverse outcomes regarding their grief and mental health (28-  
28 30). Five systematic reviews have been conducted on postvention interventions to  
29 date (31-35). These systematic reviews identify some elements of postvention that  
30 have been found useful such as proactive support immediately following a suicide,  
31 counselling, cognitive behavioural approaches, gate-keeper training and bereavement  
32 groups (31, 34-37). Szumilas (31) has asserted that schools should be a site for  
33 targeted postvention interventions, an argument which can be extended to university  
34 campuses. Although schools and universities share similar characteristics, in that they  
35 are both educational institutions, they also have unique needs. Due to the  
36 developmental stage (12, 13) and the prevalence of mental disorders and suicide  
37 among university students (6, 9, 38), it is important to identify postvention interventions  
38 specific to university students and with it, the impact of suicide bereavement on  
39 university students.  
40  
41  
42  
43  
44  
45  
46  
47  
48  
49  
50

51  
52 This scoping review aimed to answer the following question: *“What is known about*  
53 *suicide bereavement and postvention interventions for staff and students at*  
54 *universities?”*. The term universities will be used to refer to all higher education  
55 institutions (HEI's) throughout. The objectives of the review were to: (i) describe the  
56 impact of suicide bereavement on staff and students at universities; (ii) identify  
57 institutional responses to suicide bereavement at universities; (iii) describe  
58  
59  
60

1  
2  
3 postvention interventions at universities. Answering this question and objectives may  
4 provide a first step in developing recommendations for further research and guidelines  
5 that could assist universities in decision making and most appropriate action following  
6 a student suicide.  
7  
8  
9

## 10 11 12 13 14 **METHODS**

15  
16 This scoping review was conducted using the Joanna Briggs Institute (JBI) guideline  
17 for scoping reviews (39), which builds on the seminal work of Arksey and O'Malley  
18 (40) as well as Levac and colleagues (41). The review is reported using the Preferred  
19 Reporting Items for Systematic Reviews and Meta-Analyses Extension for Scoping  
20 Reviews (PRISMA-ScR) checklist (26), which is congruent with the JBI guidelines. A  
21 review protocol was developed but not published. The research question and  
22 objectives were developed through an iterative process involving discussion and  
23 collaboration of the three authors (SA, JB, KA).  
24  
25  
26  
27  
28  
29

### 30 31 **Patient and public involvement**

32 Patients or the public were not involved in the design or conduct of this scoping review.  
33 The experiences of the authors working with university students informed the need to  
34 explore the review question.  
35  
36  
37  
38  
39

### 40 41 **Search Strategy**

42 As recommended by the JBI guideline (39), a three-step search strategy was utilised.  
43 Firstly, the first author (SA) conducted a preliminary search of Academic Search  
44 Premier and PubMed to identify relevant articles in August 2021. SA consulted two  
45 expert librarians at Stellenbosch University, to develop a comprehensive search  
46 strategy using the words contained in the titles and abstracts of relevant articles and  
47 index terms used to describe articles. The search string comprised a variety of search  
48 terms, including MeSH terms, synonyms and variant spellings, connected by Boolean  
49 operators. All identified keywords and index terms were included, and this search  
50 string (see Table 1) was used across the following databases: PubMed, PsycINFO,  
51 MEDLINE, CINAHL, Africa-Wide Information, PsycARTICLES, Health Source:  
52 Nursing/Academic Edition, Academic Search Premier, SocINDEX (EBSCOHOST);  
53  
54  
55  
56  
57  
58  
59  
60

Cochrane Library, Web of Science, SCOPUS. These databases were selected because they provide a wide range of interdisciplinary literature. In PubMed the following words were filtered using title/abstract: suicide[tiab], (postvention[tiab] , "psychosocial intervention"[tiab], "post suicide"[tiab]. The searches were not limited by date of publication or location, but were limited to publications in English. We elected to include only peer-reviewed articles to ensure credible studies were included. The reference lists of included full-text articles and systematic reviews were hand searched for additional references.

**Table 1. Search string used across databases**

| Search string                                                                                                                                                                                                                                                                                                                                                                                                                                                                                                                               |
|---------------------------------------------------------------------------------------------------------------------------------------------------------------------------------------------------------------------------------------------------------------------------------------------------------------------------------------------------------------------------------------------------------------------------------------------------------------------------------------------------------------------------------------------|
| ("college student" OR "university student" OR undergraduate OR postgraduate OR lecturer OR faculty OR "administrative staff" OR "administrative personnel" OR "support staff" OR "educational personnel") AND suicide AND (postvention OR intervention OR bereavement OR grief OR debrief OR debriefing OR "crisis intervention" OR "psychosocial intervention" OR "support after suicide" OR "survivors after suicide" OR "post suicide") AND (university OR college OR "institution of higher learning" OR campus OR "higher education"). |

### Study selection

SA conducted the searches in September 2021 and updated them in June 2022. We followed two independent screening levels for selecting studies for inclusion. Table 2. outlines the inclusion criteria.

**Table 2. Inclusion criteria**

| Inclusion                                                                                                          |
|--------------------------------------------------------------------------------------------------------------------|
| i. The study population consists of university/HEI students and staff                                              |
| ii. The study report data on suicide bereavement or postvention interventions for university/HEI students or staff |
| iii. The study used qualitative, quantitative or mixed methods as primary research                                 |
| iv. The study was published in English as a peer-reviewed paper                                                    |

1  
2  
3 The first level was a title and abstract review, and the second was a full-text review.  
4 For the first level of review, Researcher SA uploaded all identified citations from the  
5 database searches into EndNote (40) and removed duplicates. Thereafter, SA  
6 imported all citations into Rayyan QCRI (41) and removed further duplicates identified  
7 by Rayyan QCRI (41). Two reviewers (SA and EB) screened and selected titles and  
8 abstracts independently according to the inclusion criteria. Twenty-nine (n=29) full-text  
9 articles were assessed with 17 articles included in the final review. Ten disagreements  
10 on study selection were resolved through a consensus discussion. Reasons for  
11 disagreement included lack of clarity regarding the study population or whether a study  
12 was a peer-reviewed publication. Figure 1. summarises the search and selection  
13 process (42)  
14  
15  
16  
17  
18  
19  
20  
21  
22

### 23 **Data extraction**

24  
25  
26 The researchers developed and piloted a Microsoft Excel data extraction form based  
27 on JBI data extraction template (39, 43). Researcher SA extracted information on  
28 author, year, journal, affiliation, country of origin, country income group according to  
29 the World Bank classification (44), aims, population characteristics, core data on  
30 methodology and key findings from each of the 17 included articles. In line with the  
31 review aims, information on postvention interventions, definitions of postvention,  
32 impact of suicide bereavement, institutional responses, practice implications and  
33 recommendations for further development were also extracted. An audit was done by  
34 EB on all the articles to ensure the accuracy of extracted data. No errors were  
35 identified. Supplementary Table 1 provides an overview of the included studies.  
36  
37  
38  
39  
40  
41  
42  
43

### 44 **Quality assessment**

45  
46  
47 SA conducted a quality assessment by using an adaptation of the JBI critical appraisal  
48 checklists (45). This quality assessment was audited by ZS. Each item on the checklist  
49 was given 1 if scored 'yes' or 0 if scored 'no' (45). A total score was calculated for each  
50 study which resulted in an overall rating against set criteria of poor quality (less than  
51 50%), moderate quality (50%-80%) and high quality (80%-100%). Most studies  
52 received a rating of moderate quality (n=15) and two were low quality. No studies were  
53 excluded due to study quality.  
54  
55  
56  
57  
58  
59  
60

---

## Data synthesis

Data were summarised into a descriptive and narrative synthesis due to the variation in study designs to answer the following questions from university settings: describe the impact of suicide bereavement on staff and students at universities; identify institutional responses to suicide bereavement at universities and describe postvention interventions at universities. Results are presented firstly as a descriptive numerical summary (46) (study characteristics) followed by key findings from the included studies.

## RESULTS

### Study characteristics

The included articles were published between 1989 and 2021 (Supplementary Table 1). Most articles (n=8) were from the USA (47-53), seven articles from the UK (54-60) and two from Canada (61, 62). The article study designs included ten quantitative studies (48, 49, 51-53, 55, 57, 61-63) involving the use of surveys; two qualitative studies using grounded theory and phenomenological approaches (50, 54) which collected data using semi-structured interviews. Five mixed-methods studies used a combination of questionnaires, (47, 56, 58-60) interviews, (47, 59) and open-ended qualitative questions (56, 58-60). Studies that were quantitative or had a quantitative element, used a range of existing outcome measures or developed measures to capture data on grief reactions (47, 51, 55, 57, 61, 62), impact of suicide bereavement (48, 49, 51-53, 55-63) and suicidal behaviours (49) Supplementary Table 1 outlines the outcome measures in greater detail.

Most articles (n=13) identified participants bereaved by suicide through surveys. Two articles (47, 63) recruited students as participants to evaluate their personal responses to those bereaved by suicide. The other two articles (50, 54) were qualitative in nature and staff participants were purposively selected as those exposed to student suicide. All study participants were adults at HEI's and ranged between 18 and 70 years old. Most of the articles (n=14), except one, (47) had more female participants than male participants. Two articles (50, 51) did not state the gender profile of the participants. Many of the articles focused on the perspectives of students (n=9) (47-49, 51-53, 61-63) or both staff and student perspectives (n=6) (55-60) with only two (50, 54) focusing

1  
2  
3 exclusively on the perspectives of staff. Most of the articles (n=16) explored the  
4 concept of suicide bereavement. We found no published articles which investigated  
5 postvention interventions in university settings.  
6  
7  
8  
9

### 10 **Key findings from included articles**

11  
12

13 Supplementary Table 1 provides a summary of the key findings of the 17 included  
14 articles arranged methodologically. The findings presented below are organised  
15 around the review objectives under the headings of: the impact of suicide bereavement  
16 on staff and students at universities, institutional responses to suicide bereavement at  
17 universities and postvention interventions at universities.  
18  
19  
20  
21  
22

### 23 **The impact of suicide bereavement on staff and students at universities**

24  
25

26 Students bereaved by suicide experienced higher levels of general grief reactions  
27 compared to those bereaved by other means such as natural causes or accidents (51,  
28 61). In one study, the Scale for Prediction of Outcome After Bereavement (SPOB) (64)  
29 was used to predict the outcome of bereavement on students. The SPOB predicted  
30 that those students who were suicide bereaved would have difficulty returning to  
31 baseline functioning (52). Staff and students had increased suicidal ideation or  
32 attempted suicide following their bereavement and most of them had not sought help  
33 for any episode of self-harm or suicidal ideation (57). As a result of their bereavement  
34 experience, for some staff and students (25%) who had never considered suicide as  
35 an option, suicide became more normalised. This fostered awareness that suicide  
36 could provide a way out of extreme distress for themselves or others (56). They  
37 suddenly had a new awareness that in a state of extreme distress they, or anyone they  
38 knew, could be vulnerable to suicide (56). In contrast, half of the staff and students  
39 expressed a conviction that they would prevent dying by suicide themselves due to  
40 the impact they had witnessed and experienced following a suicide death (56).  
41  
42  
43  
44  
45  
46  
47  
48  
49  
50  
51  
52

53 For students bereaved by suicide, there was a need to understand the death and the  
54 reasons that led to the deceased taking their own life (49, 51, 61). It is as if they needed  
55 this explanation to make sense of the suicide. They also felt responsibility that they  
56 could have done something to prevent the suicide, and this led to feelings of guilt (49,  
57 51, 55, 61). Some respondents felt like the deceased was punishing them by dying  
58  
59  
60

1  
2  
3 and felt rejected by the deceased (51, 61). Students bereaved by suicide experienced  
4 shame and embarrassment which set them apart from other students who mourn non-  
5 suicidal deaths (51, 61) They had more perceived stigma (49, 55, 61) and often felt  
6 that other people, especially friends, did not understand their feelings about the suicide  
7 death, putting a strain on relationships (49, 55). Staff and students reported that they  
8 avoided using the word 'suicide' as it made other people feel uncomfortable and  
9 concealed the cause of death for the same reasons. They also felt the social pressure  
10 to no longer be affected by the suicide, so they learnt to hide their expressions of grief  
11 (59, 60).  
12  
13  
14  
15  
16  
17  
18  
19

20 Staff reported physical and psychological responses to student suicide that impacted  
21 their personal and professional lives. Firstly, there were the practical tasks to take care  
22 of following the death of a student, such as packing up belongings, and initiating  
23 administrative processes. Some staff reported that they began to question themselves  
24 at perhaps having missed something with the students or not having done more to  
25 prevent the suicide (54). Grief following suicide bereavement impacted on staff's  
26 abilities to function in the workplace. Staff reported feeling profound sadness,  
27 confusion, anxiety, and poor concentration. This led to poor work quality, difficulty  
28 working in a team and the loss of self-confidence (58). A small group of staff and  
29 students cited an unexpected impact of suicide bereavement in their work. They stated  
30 that they used work as a distraction to cope with their emotions and work was also  
31 used as a way to make the deceased proud of them (58). Furthermore, the experience  
32 of suicide bereavement motivated some of the staff and students to change to careers  
33 related to mental health or caring for vulnerable persons (58).  
34  
35  
36  
37  
38  
39  
40  
41  
42  
43  
44  
45  
46  
47  
48  
49  
50  
51  
52  
53  
54  
55  
56

## 57 **Institutional responses to suicide bereavement at universities**

58  
59  
60

1  
2  
3 There were varying views on support received and accessed with staff citing that  
4 institutional processes were unsupportive to staff in a culture that values student  
5 mental well-being over staff well-being (58). Staff further described a lack of  
6 institutional support offered or available where managers were insensitive to their  
7 needs (58). Within work settings, both staff and students described institutional  
8 practices that were unsupportive to their grieving process such as systems for taking  
9 compassionate leave where one had to produce a death certificate, additional work  
10 responsibilities because of taking time off and difficulty catching up due to decreased  
11 work capacity (58). Furthermore, university administrators identified challenges to  
12 responding appropriately to student suicide on campus. These included a lack of  
13 postvention training received as part of their role and challenges around notification  
14 procedures communicating to the university community about the student death by  
15 suicide in a timeous manner before social media platforms shared the news, often  
16 before the family had been officially informed. Another challenge for university  
17 administrators was balancing their desire to honour the memory of the deceased  
18 student while minimising the risk of suicide contagion on campus (50).

19  
20  
21  
22  
23  
24  
25  
26  
27  
28  
29  
30  
31  
32  
33 Staff and students felt that the way that support efforts could be enhanced following  
34 suicide bereavement would be to offer support proactively and consistently over time,  
35 especially practical support (60). Practical support that was seen as valuable included  
36 childcare, help with housework and general administration. Employers and teaching  
37 staff could offer practical support by granting time off, extending deadlines and  
38 rescheduling exams (60). Staff and students could also outline their reasons for not  
39 seeking support. These included: fear of asking for support, negative experiences of  
40 previous attempts to access support, feeling that support would not benefit them and  
41 fearing judgement at their need for psychological support (60). One study found that  
42 students bereaved by suicide were less likely to receive informal support than those  
43 bereaved by natural causes (57). Another study reported that staff and students  
44 received informal support from family and friends and said this support was valuable  
45 in coping with their grief (60). Staff and students also expressed the need for  
46 professional support, but very few accessed formal support (60). Some students felt  
47 they did not receive any support and that others were unhelpful (52, 53).

### 58 59 **Postvention interventions at universities** 60



1  
2  
3 Of the 17 articles included in this scoping review, none spoke directly to any  
4 postvention interventions at the respective institutions.  
5  
6  
7

## 8 **Discussion**

9  
10 The staff and students bereaved by suicide in this review experienced higher levels of  
11 grief reactions when compared to bereavement by non-suicide deaths impacting on  
12 their personal and occupational functioning. Despite this, the findings demonstrate  
13 how staff have been largely marginalised from this research with a focus on university  
14 students. Only two studies (50, 54) focused exclusively on staff experiences. This bias  
15 towards studying the experiences of students is understandable, given that  
16 universities are set up for students; however, it is important to include staff as they  
17 have important support needs also. The staff in this review were responsible for  
18 supporting students, attending to practical tasks and informing students following a  
19 suicide death (50, 54). This raises questions about the responsibilities and  
20 expectations placed on staff and whether these are realistic. There is increasing  
21 awareness of employer responsibilities for the health and well-being of staff and safety  
22 of students (65).  
23  
24  
25  
26  
27  
28  
29  
30  
31  
32  
33

34 Following their bereavement experience, for some staff and students, suicide became  
35 more normalised and increased their awareness that suicide could be a way out of  
36 distress (56). This has some implications for suicide contagion among university  
37 students and staff. Mueller (66) describes the suicide contagion process where the  
38 suicide attempt of a friend can transform the distant idea of suicide into a way an  
39 individual can express themselves. Miklin and Mueller (67) further identify that suicide  
40 bereavement in itself is not inherently risky but it is how the bereaved person makes  
41 sense of the suicide that may contribute to the risk. Among the staff and students in  
42 this review, there was a need to make sense of the suicide (49, 51). This element for  
43 support may need to be considered in any potential interventions for staff and  
44 students. Recently, some evidence has pointed peer-led interventions as a way to  
45 support those bereaved by suicide or experiencing suicidality (68, 69). This creates an  
46 opportunity for these peer-led interventions to be used with university students and  
47 staff.  
48  
49  
50  
51  
52  
53  
54  
55  
56  
57

58 Staff and students experienced support as both helpful and unhelpful. This creates an  
59 opportunity for support measures to be enhanced and access to support improved  
60

1  
2  
3 especially through strategies that reduce the social stigma attached to accessing  
4 mental health services (2). One way to improve access is through using online support  
5 services such as online forums (70, 71) or remote services (72).  
6  
7  
8  
9

10 The articles that reported the gender profile of participants had more female than male  
11 respondents, a trend that has also been observed in suicide bereavement literature  
12 more broadly (73, 74). In published suicide research there is a gender imbalance with  
13 60 percent to 90 percent of participants identifying as women (75). This introduces  
14 bias because only women are reporting on the suicide bereavement experience.  
15 Future research should explore the perspectives of males and gender nonconforming  
16 individuals to gain a diverse perspective on the suicide bereavement experiences.  
17  
18  
19  
20  
21  
22  
23

24 A systematic mapping of postvention research over the last 50 years (76) has  
25 identified the need for more intervention studies within postvention research. This  
26 review also highlighted this gap as it did not identify studies on postvention  
27 interventions at universities. Although we primarily sought out to explore both suicide  
28 bereavement and postvention interventions among staff and students at universities,  
29 we found literature that only focuses on suicide bereavement among staff and students  
30 conducted in high-income countries. This mirrors a trend in postvention literature  
31 where 93% of research is concentrated in high-income countries particularly (USA,  
32 UK, Canada, Australia and Sweden) (76) when 77 percent of global suicides occur in  
33 low-and-middle-income countries (1).  
34  
35  
36  
37  
38  
39  
40  
41  
42

43 The strength of this review was using a robust methodology to identify some critical  
44 gaps in the postvention literature. The findings of this review should be considered  
45 within the following limitations. The studies included in this review were limited to peer-  
46 reviewed in English, so potentially relevant articles may have been missed if they were  
47 available in another language. The inclusion of peer-review articles was to introduce  
48 a level of rigour in this scoping review. Grey literature was excluded and potentially  
49 relevant articles that could change the review's outcome could have been missed.  
50 Some higher education providers in other countries do not have the word “college” or  
51 “university” or “campus” or “higher education” in their descriptors. Therefore, there is  
52 the potential that some relevant studies have not been identified in this scoping review.  
53  
54  
55  
56  
57  
58  
59  
60

---

## Conclusion

This review set out to examine suicide bereavement and postvention interventions on university campuses. The review identified studies focusing on suicide bereavement but no studies on postvention interventions on university campuses.

Nonetheless, universities have the potential to be effective sites for interventions but there is not a universal solution that will meet the needs of all institutions. HEI's are not heterogeneous in nature, and this would need to be considered when designing interventions. Some HEI's have distance students, students off campus, some are small and others large. There is a need for postvention research to move beyond descriptive studies to focus on interventions.

## ACKNOWLEDGEMENTS

The authors would like to thank the two subject librarians from Stellenbosch University who assisted with the search strategy: Mrs Marleen Hendriksz (Faculty of Arts and Social Sciences) and Mrs Ingrid Van der Westhuizen (Faculty of Medicine and Health Sciences). Appreciation and thanks is also extended to Dr Elsie Breet as the secondary reviewer throughout the article screening and selection process and data extraction. We are grateful for Ms Zarina Syed, who was able to assist as an auditor for the quality assessment.

## AUTHOR CONTRIBUTIONS

This scoping review was developed by the intellectual contributions of all the authors. All authors were involved in developing the review question and conceptualising the approach. SA developed and tested search terms in consultation with subject librarians. SA in consultation with JB and KA developed the data extraction form. SA reviewed all articles for inclusion, and no discrepancies were referred to a third reviewer. KA and JB contributed to drafting and reviewing the manuscript prior to submission.

## FUNDING STATEMENT

This scoping review is supported by the funding awarded to the first author (SA) through the National Research Foundation Doctoral Scholarship [PMDS22080147158]. KA was supported by a National Health and Medical Research Council Early Career Fellowship [1157796]. The funders had no role in the design and

1  
2  
3 execution of the scoping review or in the decision to submit the manuscript for  
4 publication. The work reported herein was made possible through funding by the South  
5 African Medical Research Council (SAMRC) through its Division of Research Capacity  
6 Development under the MCSP (awarded to JB). The content hereof is the sole  
7 responsibility of the authors and does not necessarily represent the official views of  
8 the SAMRC.  
9  
10  
11  
12  
13  
14  
15

## 16 **COMPETING INTERESTS STATEMENT**

17 The authors declare that they have no competing interests.  
18  
19

## 20 **ETHICS APPROVAL**

21 Not required  
22  
23

## 24 **PATIENT CONSENT FOR PUBLICATION**

25 Not required.  
26  
27

## 28 **DATA SHARING STATEMENT**

29 All data relevant to the study are included in the article or uploaded as a supplementary  
30 file.  
31  
32

33 **Word Count: 4153**  
34  
35  
36  
37  
38  
39  
40  
41  
42  
43  
44  
45  
46  
47  
48  
49  
50  
51  
52  
53  
54  
55  
56  
57  
58  
59  
60

---

## REFERENCES

1. World Health Organization. Suicide Worldwide in 2019: Global Health Estimates. 2021 16 June 2021. Report No.: 9789240026643.
2. Pillay J. Suicidal behaviour among university students: A systematic review. *South African Journal of Psychology*. 2021;51(1):54-66.
3. Lindsay BL, Szeto AC. The influence of media on the stigma of suicide when a postsecondary student dies by suicide. *Archives of suicide research*. 2022:1-18.
4. Giangrasso B, Chung MC, Franzoi IG. Psychological interventions addressed to higher education students in student psychological services. *Frontiers in Psychology*. 2023;14:1129697.
5. Bantjes J, Breet E, Saal W, Lochner C, Roos J, Taljaard L, et al. Epidemiology of non-fatal suicidal behavior among first-year university students in South Africa. *Death studies*. 2019:1.
6. Auerbach RP, Mortier P, Bruffaerts R, Alonso J, Benjet C, Cuijpers P, et al. WHO World Mental Health Surveys International College Student Project: Prevalence and Distribution of Mental Disorders. *Journal of Abnormal Psychology*. 2018;127(7):623-38.
7. Mortier P, Cuijpers P, Kiekens G, Auerbach RP, Demyttenaere K, Green JG, et al. The prevalence of suicidal thoughts and behaviours among college students: a meta-analysis. *Psychol Med*. 2018;48(4):554-65.
8. Makhubela M. Suicide and depression in university students: a possible epidemic. SAGE Publications Sage UK: London, England; 2021. p. 3-5.
9. Bantjes J, Kessler M, Lochner C, Breet E, Bawa A, Roos J, et al. The mental health of university students in South Africa: Results of the national student survey. *Journal of Affective Disorders*. 2023;321:217-26.
10. Mortier P, Auerbach RP, Alonso J, Bantjes J, Benjet C, Cuijpers P, et al. Suicidal Thoughts and Behaviors Among First-Year College Students: Results From the WMH-ICS Project. *Journal of the American Academy of Child and Adolescent Psychiatry*. 2018;57(4):263-73.e1.
11. Peltzer K, Yi S, Pengpid S. Suicidal behaviors and associated factors among university students in six countries in the Association of Southeast Asian Nations (ASEAN). *Asian J Psychiatr*. 2017;26:32-8.
12. Conley CS, Kirsch AC, Dickson DA, Bryant FB. Negotiating the transition to college: Developmental trajectories and gender differences in psychological functioning, cognitive-affective strategies, and social well-being. *Emerging Adulthood*. 2014;2(3):195-210.
13. Syed M. Emerging adulthood: Developmental stage, theory, or nonsense. In: Arnett JJ, editor. *The Oxford handbook of emerging adulthood*. New York: Oxford University Press; 2016. p. 11-25.
14. Dorney P. The Empty Desk: The Sudden Death of a Nursing Classmate. *OMEGA-Journal of Death and Dying*. 2016;74(2):164-92.
15. Ata AW. Mental health of bereaved Muslims in Australia: religious, gender, after death communication (adc) and grief issues. *Journal of Religious Education*. 2016;64(1):47-58.

16. Cerel J, McIntosh JL, Neimeyer RA, Maple M, Marshall D. The continuum of "survivorship": Definitional issues in the aftermath of suicide. *Suicide and Life-Threatening Behavior*. 2014;44(6):591-600.
17. Kheibari A, Cerel J, Sanford R. Attitudes About Suicide Ideation Among Suicide Loss Survivors: A Vignette Study. *Psychological Reports*. 2019;122(5):1707-19.
18. Sanford R, Kheibari A, Cerel J. Attitudes About Suicide Ideation Among Suicide Loss Survivors: A Vignette Study. *Psychological Reports*. 2019;122(5):1707-19.
19. Berman AL. Estimating the population of survivors of suicide: seeking an evidence base. *Suicide & life-threatening behavior*. 2011;41(1):110.
20. Bartik W, Maple M, McKay K. Suicide bereavement and stigma for young people in rural Australia: a mixed methods study. *Advances in Mental Health*. 2015;13(1):84-95.
21. Kaur R, Stedmon J. A phenomenological enquiry into the impact of bereavement by suicide over the life course. *Mortality*. 2022;27(1):53-74.
22. Leenaars LS, Leenaars AA. Suicide postvention programs in colleges and universities. In: Lamis DA, Lester D, editors. *Understanding and preventing college student suicide*. Springfield, IL: Charles C Thomas Publisher; 2011. p. 273-90.
23. Streufert BJ. Death on campuses: Common Postvention Strategies in Higher Education. *Death studies*. 2004;28(2):151-72.
24. Kölves K, Ross V, Hawgood J, Spence SH, De Leo D. The impact of a student's suicide: Teachers' perspectives. *Journal of affective disorders*. 2017;207:276-81.
25. Kim JE. Korean teachers' bereavement experience following student suicide. *Crisis*. 2019.
26. Arksey AM, Greidanus EJ. "I Could Hardly Breathe": Teachers' Lived Experiences of Bereavement After the Violent Death of a Student. *Canadian Journal of Counselling & Psychotherapy/Revue Canadienne de Counseling et de Psychothérapie*. 2022;56(1).
27. Azorina V, Morant N, Nesse H, Stevenson F, Osborn D, King M, et al. The perceived impact of suicide bereavement on specific interpersonal relationships: A qualitative study of survey data. *International journal of environmental research and public health*. 2019;16(10):1801.
28. Andriessen K. Can postvention be prevention? *Crisis*. 2009;30(1):43-7.
29. Levine H. Suicide and its impact on campus. *New directions for student services*. 2008;2008(121):63-76.
30. Trimble T, Hannigan B, Gaffney M. Suicide postvention; coping, support and transformation. *The Irish Journal of Psychology*. 2012;33(2-3):115-21.
31. Szumilas M, Kutcher S. Post-suicide intervention programs: a systematic review. *Canadian Journal of Public Health*. 2011;102(1):18-9.
32. Tøllefsen IM, Thiblin I, Helweg-Larsen K, Hem E, Kastrup M, Nyberg U, et al. Accidents and undetermined deaths: re-evaluation of nationwide samples from the Scandinavian countries. *BMC public health*. 2016;16:449.
33. van der Feltz-Cornelis CM, Sarchiapone M, Postuvan V, Volker D, Roskar S, Grum AT, et al. Best Practice Elements of Multilevel Suicide Prevention Strategies A Review of Systematic Reviews. *Crisis-The Journal of Crisis Intervention and Suicide Prevention*. 2011;32(6):319-33.

34. Andriessen K, Kryszynska K, Hill N, Reifels L, Robinson J, Reavley N, et al. Effectiveness of interventions for people bereaved through suicide: a systematic review of controlled studies of grief, psychosocial and suicide-related outcomes. *BMC psychiatry*. 2019;19(1):1-15.
35. Andriessen K, Kryszynska K, Kølves K, Reavley N. Suicide Postvention Service Models and Guidelines 2014–2019: A Systematic Review. *Frontiers in Psychology*. 2019;10(2677).
36. Linde K, Trembl J, Steinig J, Nagl M, Kersting A. Grief interventions for people bereaved by suicide: A systematic review. *PLoS One*. 2017;12(6):e0179496.
37. McDaid C, Trowman R, Golder S, Hawton K, Sowden A. Interventions for people bereaved through suicide: systematic review. *The British Journal of Psychiatry*. 2008;193(6):438-43.
38. Bruffaerts R, Mortier P, Auerbach RP, Alonso J, Hermsillo De la Torre AE, Cuijpers P, et al. Lifetime and 12-month treatment for mental disorders and suicidal thoughts and behaviors among first year college students. *International Journal of Methods in Psychiatric Research*. 2019;28(2):1-15.
39. Peters MD, Godfrey C, McInerney P, Munn Z, Tricco AC, Khalil H. Chapter 11: scoping reviews (2020 version). *JBIM manual for evidence synthesis*, JBI. 2020;2020.
40. Analytics C. Endnote version 20.2. San Francisco: Clarivate Analytics; 2021.
41. Ouzzani M, Hammady H, Fedorowicz Z, Elmagarmid A. Rayyan—a web and mobile app for systematic reviews. *Systematic reviews*. 2016;5(1):1-10.
42. Page MJ, McKenzie JE, Bossuyt PM, Boutron I, Hoffmann TC, Mulrow CD, et al. The PRISMA 2020 statement: an updated guideline for reporting systematic reviews. *Systematic reviews*. 2021;10(1):1-11.
43. Arksey H, O'Malley L. Scoping studies: towards a methodological framework. *International journal of social research methodology*. 2005;8(1):19-32.
44. World Bank. World Bank Country and Lending Groups 2023 [Available from: <https://datahelpdesk.worldbank.org/knowledgebase/articles/906519-world-bank-country-and-lending-groups>].
45. Aromataris E, Munn Z. *JBIM manual for evidence synthesis: Joanna Briggs Institute*; 2020.
46. Levac D, Colquhoun H, O'Brien KK. Scoping studies: advancing the methodology. *Implementation science*. 2010;5(1):1-9.
47. Allen BG, Calhoun LG, Cann A, Tedeschi RG. The effect of cause of death on responses to the bereaved: Suicide compared to accident and natural causes. *Omega: Journal of Death and Dying*. 1993;28(1):39-48.
48. Balk DE, Walker AC, Baker A. Prevalence and severity of college student bereavement examined in a randomly selected sample. *Death Studies*. 2010;34(5):459-68.
49. McIntosh JL, Kelly LD. Survivors' reactions: Suicide vs other causes. *Crisis: The Journal of Crisis Intervention and Suicide Prevention*. 1992;13(2):82-93.
50. Rompalo S, Parks R, Taylor A. Suicide Postvention: A Growing Challenge for Higher Education Administrators. *College and University*. 2021;96(1):63-70.
51. Silverman E, Range L, Overholser JC. Bereavement from suicide as compared to other forms of bereavement. *Omega: Journal of Death and Dying*. 1994;30(1):41-51.

- 1
  - 2
  - 3
  - 4
  - 5
  - 6
  - 7
  - 8
  - 9
  - 10
  - 11
  - 12
  - 13
  - 14
  - 15
  - 16
  - 17
  - 18
  - 19
  - 20
  - 21
  - 22
  - 23
  - 24
  - 25
  - 26
  - 27
  - 28
  - 29
  - 30
  - 31
  - 32
  - 33
  - 34
  - 35
  - 36
  - 37
  - 38
  - 39
  - 40
  - 41
  - 42
  - 43
  - 44
  - 45
  - 46
  - 47
  - 48
  - 49
  - 50
  - 51
  - 52
  - 53
  - 54
  - 55
  - 56
  - 57
  - 58
  - 59
  - 60
52. Thompson KE, Range LM. Recent bereavement from suicide and other deaths: Can people imagine it as it really is? *Omega: Journal of Death and Dying*. 1990;22(4):249-59.
53. Thompson KE, Range LM. Bereavement following suicide and other deaths - Why support attempts fail. *OMEGA-Journal of Death and Dying*. 1993;26(1):61-70.
54. Causer H, Bradley E, Muse K, Smith J. Bearing witness: A grounded theory of the experiences of staff at two United Kingdom Higher Education Institutions following a student death by suicide. *PloS one*. 2021;16(5):e0251369.
55. Pitman AL, Osborn DP, Rantell K, King MB. The stigma perceived by people bereaved by suicide and other sudden deaths: A cross-sectional UK study of 3432 bereaved adults. *Journal of psychosomatic research*. 2016;87:22-9.
56. Pitman A, Nesse H, Morant N, Azorina V, Stevenson F, King M, et al. Attitudes to suicide following the suicide of a friend or relative: a qualitative study of the views of 429 young bereaved adults in the UK. *BMC psychiatry*. 2017;17(1):400.
57. Pitman AL, Rantell K, Moran P, Sireling L, Marston L, King M, et al. Support received after bereavement by suicide and other sudden deaths: a cross-sectional UK study of 3432 young bereaved adults. *BMJ Open*. 2017;7(5):e014487.
58. Pitman A, Putri AK, De Souza T, Stevenson F, King M, Osborn D, et al. The Impact of Suicide Bereavement on Educational and Occupational Functioning: A Qualitative Study of 460 Bereaved Adults. *International Journal of Environmental Research and Public Health*. 2018;15(4).
59. Pitman AL, Stevenson F, Osborn DPJ, King MB. The stigma associated with bereavement by suicide and other sudden deaths: A qualitative interview study. *Soc Sci Med*. 2018;198:121-9.
60. Pitman A, De Souza T, Putri AK, Stevenson F, King M, Osborn D, et al. Support Needs and Experiences of People Bereaved by Suicide: Qualitative Findings from a Cross-Sectional British Study of Bereaved Young Adults. *International Journal of Environmental Research and Public Health*. 2018;15(4).
61. Bailey SE, Kral MJ. Survivors of suicide do grieve differently: Empirical support for a common sense proposition. *Suicide & Life-Threatening Behavior*. 1999;29(3):256.
62. Bhaskaran J, Afifi TO, Sareen J, Vincent N, Bolton JM. A cross-sectional examination of sudden-death bereavement in university students. *Journal of American College Health*. 2021:1-9.
63. Thornton G, Whittemore KD, Robertson DU. Evaluation of people bereaved by suicide. *Death Studies*. 1989;13(2):119-26.
64. Parkes C, Weiss R. *Recovery from bereavement* Basic Books. New York. 1983.
65. Wieneke KC, Schaepe KS, Egginton JS, Jenkins SM, Block NC, Riley BA, et al. The supervisor's perceived role in employee well-being: Results from Mayo Clinic. *American Journal of Health Promotion*. 2019;33(2):300-11.
66. Mueller AS, Abrutyn S. Suicidal disclosures among friends: Using social network data to understand suicide contagion. *Journal of health and social behavior*. 2015;56(1):131-48.



- 1
  - 2
  - 3
  - 4
  - 5
  - 6
  - 7
  - 8
  - 9
  - 10
  - 11
  - 12
  - 13
  - 14
  - 15
  - 16
  - 17
  - 18
  - 19
  - 20
  - 21
  - 22
  - 23
  - 24
  - 25
  - 26
  - 27
  - 28
  - 29
  - 30
  - 31
  - 32
  - 33
  - 34
  - 35
  - 36
  - 37
  - 38
  - 39
  - 40
  - 41
  - 42
  - 43
  - 44
  - 45
  - 46
  - 47
  - 48
  - 49
  - 50
  - 51
  - 52
  - 53
  - 54
  - 55
  - 56
  - 57
  - 58
  - 59
  - 60
- 
67. Miklin S, Mueller AS, Abrutyn S, Ordonez K. What does it mean to be exposed to suicide?: Suicide exposure, suicide risk, and the importance of meaning-making. *Soc Sci Med.* 2019;233:21-7.
68. Higgins A, Hybholt L, Meuser OA, Eustace Cook J, Downes C, Morrissey J. Scoping Review of Peer-Led Support for People Bereaved by Suicide. *International journal of environmental research and public health.* 2022;19(6).
69. Schlichthorst M, Ozols I, Reifels L, Morgan A. Lived experience peer support programs for suicide prevention: a systematic scoping review. *International Journal of Mental Health Systems.* 2020;14(1):1-12.
70. Cole AB, Leavens EL, Brett EI, Lopez SV, Pipestem KR, Tucker RP, et al. Alcohol use and the interpersonal theory of suicide in American Indian young adults. *Journal of Ethnicity in Substance Abuse.* 2020;19(4):537-52.
71. Perry A, Pyle D, Lamont-Mills A, du Plessis C, du Preez J. Suicidal behaviours and moderator support in online health communities: a scoping review. *BMJ open.* 2021;11(6):e047905.
72. Mirick RG, Wladkowski SP. Skype in qualitative interviews: Participant and researcher perspectives. *The Qualitative Report.* 2019;24(12):3061-72.
73. Andriessen K, Castelli Dransart DA, Cerel J, Maple M. Current Postvention Research and Priorities for the Future. *Crisis.* 2017;38(3):202-6.
74. Andriessen K, Mowll J, Lobb E, Draper B, Dudley M, Mitchell PB. "Don't bother about me." The grief and mental health of bereaved adolescents. *Death studies.* 2018;42(10):607-15.
75. Maple M, Cerel J, Jordan JR, McKay K. Uncovering and Identifying the Missing Voices in Suicide Bereavement. *Suicidology Online.* 2014;5(1).
76. Maple M, Pearce T, Sanford R, Cerel J, Castelli Dransart DA, Andriessen K. A Systematic Mapping of Suicide Bereavement and Postvention Research and a Proposed Strategic Research Agenda. *Crisis.* 2018;39(4):275-82.

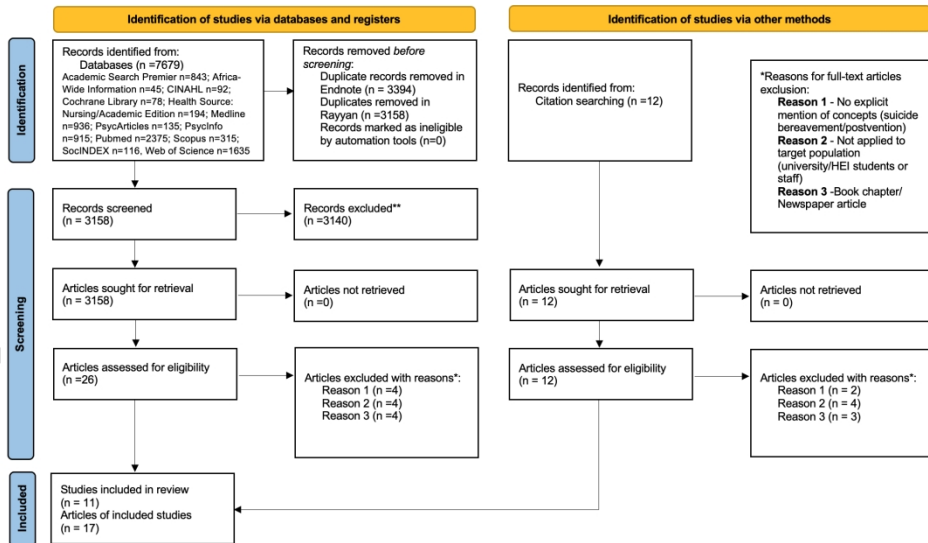

Figure 1. PRISMA Diagram

401x242mm (144 x 144 DPI)

1  
2  
3  
4  
5  
6  
7  
8  
9  
10  
11  
12  
13  
14  
15  
16  
17  
18  
19  
20  
21  
22  
23  
24  
25  
26  
27  
28  
29  
30  
31  
32  
33  
34  
35  
36  
37  
38  
39  
40  
41  
42  
43  
44  
45  
46

**Supplementary Table 1. Articles included in the review**

| Authors<br>(year)                       | Design and methods                 | Participants                                                                                   | Instrument/Measures                                                 | Key Findings                                                                                                                                                                                                                                                                                                           |
|-----------------------------------------|------------------------------------|------------------------------------------------------------------------------------------------|---------------------------------------------------------------------|------------------------------------------------------------------------------------------------------------------------------------------------------------------------------------------------------------------------------------------------------------------------------------------------------------------------|
| Location                                | <b>QUALITATIVE STUDIES</b>         |                                                                                                |                                                                     |                                                                                                                                                                                                                                                                                                                        |
| Causer et al (2021)<br>(43)<br><br>UK   | Qualitative<br><br>Grounded theory | <i>N</i> = 19 Staff at HEI's:<br><br><i>n</i> = 8 Male (42%)<br><br><i>n</i> = 11 Female (58%) | Survey and Interviews<br>developed and conducted<br>by the authors. | Staff described how in<br>"bearing witness" to student<br>suicide that all subsequent<br>experiences were shaped.<br>This included practical tasks<br>immediately following the<br>death by suicide, physical,<br>emotional and<br>psychological changes and<br>experiences of support.                                |
| Rompalo et al<br>(2021) (44)<br><br>USA | Qualitative<br><br>Phenomenology   | <i>N</i> = 8 student affairs<br>administrators<br><br>Gender not stated                        | Online interviews                                                   | HEI administrators identified<br>three main challenges i)<br>lack of postvention training<br>ii) managing notifications<br>about the student death<br>before it gets announced on<br>social media iii) balancing<br>remembering the student<br>with a memorial while<br>minimising the risk of<br>suicide contagion on |

campus. HEI administrators also stated that there are those that felt that by having memorials one was “glorifying” the deceased student.

#### MIXED METHOD STUDIES

|                            |               |                                                                                                                                                                   |                                                                                                                               |                                                                                                                                                                                                                                                                             |
|----------------------------|---------------|-------------------------------------------------------------------------------------------------------------------------------------------------------------------|-------------------------------------------------------------------------------------------------------------------------------|-----------------------------------------------------------------------------------------------------------------------------------------------------------------------------------------------------------------------------------------------------------------------------|
| Allen et al (1993) (45)    | Mixed methods | <i>n</i> = 30 male (50%) <i>n</i> = 30 female (50%) undergraduate university students. Mean age 21 years. 75% Caucasian, 15% African-American, 9% other ethnicity | State-Trait Anxiety Inventory and interview (46)                                                                              | Those bereaved by suicide are perceived to be different from individuals bereaved by other causes of death. Individuals bereaved by suicide are also viewed as more psychologically disturbed and more able to prevent the deaths compared to accidental or natural deaths. |
| USA                        |               |                                                                                                                                                                   |                                                                                                                               |                                                                                                                                                                                                                                                                             |
| *Pitman et al (2017b) (47) | Mixed methods | <i>N</i> = 429 staff and students at British HEI's bereaved by suicide:                                                                                           | Online questionnaire developed by the authors with 119 closed quantitative questions and 20 open ended qualitative questions. | Following their experiences of suicide bereavement, the respondents saw suicide as a tangible option, identified their shared vulnerability to                                                                                                                              |

1  
2  
3  
4  
5  
6  
7  
8  
9  
10  
11  
12  
13  
14  
15  
16  
17  
18  
19  
20  
21  
22  
23  
24  
25  
26  
27  
28  
29  
30  
31  
32  
33  
34  
35  
36  
37  
38  
39  
40  
41  
42  
43  
44  
45  
46

|                                  |                                                                       |                                                                                                              |                                                                                                                                                                                    |                                                                                                                                                                                                                                                                                                                                                                                                                                                                                  |
|----------------------------------|-----------------------------------------------------------------------|--------------------------------------------------------------------------------------------------------------|------------------------------------------------------------------------------------------------------------------------------------------------------------------------------------|----------------------------------------------------------------------------------------------------------------------------------------------------------------------------------------------------------------------------------------------------------------------------------------------------------------------------------------------------------------------------------------------------------------------------------------------------------------------------------|
| UK                               | (Quantitative cross-sectional; Qualitative descriptive)               | Male: not stated<br>Female: 82% (number not stated)<br>Mean age: 25.3 years                                  | one out of 20 questions were the focus of this report.                                                                                                                             | suicide and made personal determination to avoid dying by suicide.                                                                                                                                                                                                                                                                                                                                                                                                               |
| *Pitman et al (2018a) (48)<br>UK | Mixed methods (Quantitative cross-sectional; Qualitative descriptive) | N = 420 staff and students at British HEI's bereaved by suicide:<br>n = 71 Male(17%)<br>n = 349 Female (83%) | Online questionnaire developed by the authors with 119 closed quantitative questions and 20 open ended qualitative questions. 2 out of 20 questions were the focus of this report. | In the quantitative responses, the majority of the participants (75%) reported receiving informal support from friends. 41% of those who received support also received support from a mental health professional. The participants were also able to describe the experience of the support received, articulate specific support needs such as proactive support, and also outline reasons for not seeking support because they believed they would not find support valuable. |
| *Pitman et al (2018b) (49)<br>UK | Mixed methods (Quantitative cross-sectional; Qualitative descriptive) | N = 460 staff and students at British HEI's bereaved by suicide:<br>n = 76 Male (17%)                        | Online questionnaire developed by the authors with 119 closed quantitative questions and 20 open ended qualitative questions.                                                      | The respondents bereaved by suicide noted specific aspects of grief which impacted their work performance, particularly sadness, poor                                                                                                                                                                                                                                                                                                                                            |

|    |                     |                        |                                     |                             |                                |
|----|---------------------|------------------------|-------------------------------------|-----------------------------|--------------------------------|
| 1  |                     |                        |                                     |                             |                                |
| 2  |                     |                        |                                     |                             |                                |
| 3  |                     |                        | <i>n</i> = 384 Female (83%)         | 2 out of 20 questions were  | concentration, confusion       |
| 4  |                     |                        |                                     | the focus of this report.   | and anxiety. Respondents       |
| 5  |                     |                        |                                     |                             | also cited structural          |
| 6  |                     |                        |                                     |                             | challenges in work and         |
| 7  |                     |                        |                                     |                             | educational settings, such     |
| 8  |                     |                        |                                     |                             | as lack of support.            |
| 9  |                     |                        |                                     |                             |                                |
| 10 |                     |                        |                                     |                             |                                |
| 11 |                     |                        |                                     |                             |                                |
| 12 | *Pitman et al       | Mixed methods          | <i>n</i> = 27 staff and students at | Following cross-sectional   | Most of the respondents        |
| 13 | (2018c) (50)        |                        | British HEI's bereaved by           | survey participants invited | bereaved by suicide who        |
| 14 |                     | (Quantitative cross-   | suicide:                            | for face to face interview  | were non-British perceived     |
| 15 | UK                  | sectional; Qualitative | <i>n</i> = 76 Male (17%)            |                             | that others blamed them or     |
| 16 |                     | descriptive)           | <i>n</i> = 384 Female (83%)         |                             | their relatives and friends as |
| 17 |                     |                        |                                     |                             | being responsible for the      |
| 18 |                     |                        |                                     |                             | decedent's suicide. They       |
| 19 |                     |                        |                                     |                             | further described that they    |
| 20 |                     |                        |                                     |                             | experienced a lack of          |
| 21 |                     |                        |                                     |                             | support from both friends      |
| 22 |                     |                        |                                     |                             | and professionals and this     |
| 23 |                     |                        |                                     |                             | was experienced as             |
| 24 |                     |                        |                                     |                             | stigmatising.                  |
| 25 |                     |                        |                                     |                             |                                |
| 26 |                     |                        |                                     |                             |                                |
| 27 |                     |                        |                                     |                             |                                |
| 28 |                     |                        | <b>QUANTITATIVE STUDIES</b>         |                             |                                |
| 29 |                     |                        |                                     |                             |                                |
| 30 |                     |                        |                                     |                             |                                |
| 31 | Bailey et al (1999) | Quantitative           | <i>N</i> = 350 university students  | Grief Experience            | Individuals bereaved by        |
| 32 | (51)                |                        |                                     | Questionnaire (52)          | suicide reported feeling       |
| 33 |                     | Descriptive            | <i>n</i> = 259 bereaved by natural  |                             | responsible for the person's   |
| 34 | Canada              |                        | causes                              | Impact of Event Scale       | death compared to the          |
| 35 |                     |                        |                                     | Texas Revised Inventory of  | other bereaved groups          |
| 36 |                     |                        | <i>n</i> =57 bereaved by accident   | Grief (53)                  | (accident and natural          |
| 37 |                     |                        |                                     |                             | causes).                       |
| 38 |                     |                        |                                     | Questionnaire developed by  |                                |
| 39 |                     |                        |                                     | the authors                 |                                |
| 40 |                     |                        |                                     |                             |                                |
| 41 |                     |                        |                                     |                             |                                |
| 42 |                     |                        |                                     |                             |                                |
| 43 |                     |                        |                                     |                             |                                |
| 44 |                     |                        |                                     |                             |                                |
| 45 |                     |                        |                                     |                             |                                |
| 46 |                     |                        |                                     |                             |                                |

1  
2  
3  
4  
5  
6  
7  
8  
9  
10  
11  
12  
13  
14  
15  
16  
17  
18  
19  
20  
21  
22  
23  
24  
25  
26  
27  
28  
29  
30  
31  
32  
33  
34  
35  
36  
37  
38  
39  
40  
41  
42  
43  
44  
45  
46

*n* = 34 bereaved by suicide

*n* = 90 Male (26.2%)

*n* = 253 Female (73.8)

*n* = 7 Other

Mean age: 20.75 years

87.9% Caucasian

Balk et al (2010)  
(54)

Quantitative  
Cross-sectional

USA

*N* = 118 undergraduate university students:

*n* = 31 bereaved by natural causes

*n* = 8 bereaved by accident

*n* = 6 bereaved by murder

*n* = 4 bereaved by suicide

Male: 41% (number not stated)

Female: 59% (number not stated)

94% Protestants (number not stated)

Prigerson et al. (2008) revised and shortened the Inventory for Traumatic Grief into a 13-item questionnaire that can be used to measure complicated grief and diagnose prolonged grief disorder (55).

Demographic and background questionnaire developed by the authors

In this sample of undergraduate students, four of the decedents died by suicide.

|    |                  |                 |                                        |                             |                              |
|----|------------------|-----------------|----------------------------------------|-----------------------------|------------------------------|
| 1  |                  |                 |                                        |                             |                              |
| 2  |                  |                 |                                        |                             |                              |
| 3  |                  |                 | 69% Caucasian (number not              |                             |                              |
| 4  |                  |                 | stated)                                |                             |                              |
| 5  | Bhaskaran et al  | Quantitative    | <i>N</i> = 964 bereaved university     | Patient Health              | 75 out of 964 deaths were    |
| 6  | (2021) (56)      |                 | students:                              | Questionnaire (PHQ-9) (57)  | due to suicide. Suicide is   |
| 7  |                  | Cross-sectional |                                        |                             | categorised under sudden     |
| 8  | Canada           |                 | <i>n</i> = 322 Male (33.4%)            | Generalized Anxiety         | death bereavement.           |
| 9  |                  |                 |                                        | Disorder Assessment-7       | Sudden death bereavement     |
| 10 |                  |                 | <i>n</i> = 632 Female (65.6%)          | (GAD-7) (58)                | was associated with          |
| 11 |                  |                 |                                        |                             | increased likelihood of      |
| 12 |                  |                 | <i>n</i> = 134 bereaved through        | Inventory of Complicated    | complicated grief            |
| 13 |                  |                 | accidents:                             | Grief (ICG) (59)            | symptomatology and           |
| 14 |                  |                 | <i>n</i> = 20 bereaved through         |                             | increased likelihood of      |
| 15 |                  |                 | homicide                               | National Stressful Events   | generalised anxiety          |
| 16 |                  |                 | <i>n</i> = 75 bereaved through suicide | PTSD Short Scale (NSESS)    | disorder.                    |
| 17 |                  |                 |                                        | (60)                        |                              |
| 18 |                  |                 | <i>n</i> = 648 bereaved through        |                             |                              |
| 19 |                  |                 | illness                                | The alcohol use disorders   |                              |
| 20 |                  |                 |                                        | identification test (AUDIT) |                              |
| 21 |                  |                 | <i>n</i> = 87 bereaved through         | (61)                        |                              |
| 22 |                  |                 | unknown causes                         |                             |                              |
| 23 |                  |                 |                                        |                             |                              |
| 24 |                  |                 |                                        |                             |                              |
| 25 |                  |                 |                                        |                             |                              |
| 26 |                  |                 |                                        |                             |                              |
| 27 | McIntosh & Kelly | Quantitative    | <i>N</i> = 174 university students:    | Demographic questionnaire   | Those bereaved by suicide    |
| 28 | (1992) (62)      |                 |                                        | developed by authors        | and accidents felt a greater |
| 29 |                  | Cross-sectional | <i>n</i> = 63 bereaved by natural      |                             | need to understand the       |
| 30 | USA              |                 | causes                                 | Suicidal Behaviors          | death. 87 percent of those   |
| 31 |                  |                 |                                        | Questionnaire (63)          | bereaved by suicide also     |
| 32 |                  |                 | <i>n</i> = 71 bereaved by accidents    |                             | indicated that they felt     |
| 33 |                  |                 |                                        | Impact of Event Scale (64)  | stigmatised by others.       |
| 34 |                  |                 | <i>n</i> = 40 bereaved by suicide      |                             | There was no difference to   |
| 35 |                  |                 |                                        | Revised UCLA Loneliness     | the guilt felt by those      |
| 36 |                  |                 | Mean age: 27.9 years                   | Scale (65)                  | bereaved by suicide when     |
| 37 |                  |                 |                                        |                             | compared to those            |
| 38 |                  |                 |                                        |                             | bereaved by natural causes   |
| 39 |                  |                 |                                        |                             | and accidents.               |
| 40 |                  |                 |                                        |                             |                              |
| 41 |                  |                 |                                        |                             |                              |
| 42 |                  |                 |                                        |                             |                              |
| 43 |                  |                 |                                        |                             |                              |
| 44 |                  |                 |                                        |                             |                              |
| 45 |                  |                 |                                        |                             |                              |
| 46 |                  |                 |                                        |                             |                              |



1  
2  
3  
4  
5  
6  
7  
8  
9  
10  
11  
12  
13  
14  
15  
16  
17  
18  
19  
20  
21  
22  
23  
24  
25  
26  
27  
28  
29  
30  
31  
32  
33  
34  
35  
36  
37  
38  
39  
40  
41  
42  
43  
44  
45  
46

|                            |                 |                                                                                                     |                                                    |                                                                                                                             |                                                                                                                                                                                                                                                                                                                                             |
|----------------------------|-----------------|-----------------------------------------------------------------------------------------------------|----------------------------------------------------|-----------------------------------------------------------------------------------------------------------------------------|---------------------------------------------------------------------------------------------------------------------------------------------------------------------------------------------------------------------------------------------------------------------------------------------------------------------------------------------|
|                            |                 |                                                                                                     | <i>n</i> = 55 Male (32%)                           | Texas Revised Inventory of Grief (TRIG) (53)                                                                                |                                                                                                                                                                                                                                                                                                                                             |
|                            |                 |                                                                                                     | <i>n</i> = 119 Female (68%)                        |                                                                                                                             |                                                                                                                                                                                                                                                                                                                                             |
| *Pitman et al (2016) (66)  | Quantitative    | <i>N</i> = 3432 HEI staff and students who had experienced a sudden bereavement of a close contact. |                                                    | Online questionnaire developed by the authors.                                                                              | The group of those bereaved by suicide had higher shame, stigma, guilt and responsibility scores when compared to those bereaved by other means.                                                                                                                                                                                            |
| UK                         | Cross-sectional |                                                                                                     | <i>n</i> = 2106 bereaved by natural causes         | 10-item stigmatization subscale of the Grief Experience Questionnaire (GEQ) (67).                                           |                                                                                                                                                                                                                                                                                                                                             |
|                            |                 |                                                                                                     | <i>n</i> = 712 bereaved by sudden unnatural causes | Secondary measures three related GEQ subscales: shame, responsibility and guilt (52)                                        |                                                                                                                                                                                                                                                                                                                                             |
|                            |                 |                                                                                                     | <i>n</i> = 614 bereaved by suicide                 |                                                                                                                             |                                                                                                                                                                                                                                                                                                                                             |
|                            |                 |                                                                                                     | <i>n</i> = 648 Males (19%)                         |                                                                                                                             |                                                                                                                                                                                                                                                                                                                                             |
|                            |                 |                                                                                                     | <i>n</i> = 2784 Females (81%)                      |                                                                                                                             |                                                                                                                                                                                                                                                                                                                                             |
| *Pitman et al (2017a) (68) | Quantitative    | <i>N</i> = 3432 HEI staff and students who had experienced a sudden bereavement of a close contact. |                                                    | Online questionnaire developed by the authors to elicit quantitative data on sociodemographic and clinical characteristics. | Individuals bereaved by suicide were significantly less likely to receive informal support compared to those bereaved by natural causes and likely to report delayed receipt of support. In this sample 25 percent (one in four) people bereaved by suicide had received no formal or informal support. 6 percent of the sample bereaved by |
| UK                         | Cross-sectional |                                                                                                     | <i>n</i> = 2106 bereaved by natural causes         | Composite International Diagnostic Interview screen for lifetime depression (69)                                            |                                                                                                                                                                                                                                                                                                                                             |
|                            |                 |                                                                                                     | <i>n</i> = 712 bereaved by sudden unnatural causes | Stigma subscale of the Grief Experience Questionnaire (70)                                                                  |                                                                                                                                                                                                                                                                                                                                             |
|                            |                 |                                                                                                     | <i>n</i> = 614 bereaved by suicide                 |                                                                                                                             |                                                                                                                                                                                                                                                                                                                                             |
|                            |                 |                                                                                                     | <i>n</i> = 648 Males (19%)                         |                                                                                                                             |                                                                                                                                                                                                                                                                                                                                             |

|    |                  |                 |                                     |                            |                             |
|----|------------------|-----------------|-------------------------------------|----------------------------|-----------------------------|
| 1  |                  |                 |                                     |                            |                             |
| 2  |                  |                 |                                     |                            |                             |
| 3  |                  |                 |                                     |                            |                             |
| 4  |                  |                 | <i>n</i> = 2784 Females (81%)       |                            | suicide reported attempting |
| 5  |                  |                 |                                     |                            | suicide since the           |
| 6  |                  |                 |                                     |                            | bereavement.                |
| 7  | Silverman et al  | Quantitative    | <i>N</i> = 55 college students      | Grief Experience           | Those bereaved by suicide   |
| 8  | (1994) (71)      |                 | bereaved in the last 5 years        | Questionnaires (52)        |                             |
| 9  |                  | Cross-sectional |                                     |                            |                             |
| 10 | USA              |                 | <i>n</i> = 12 bereaved by natural   | Interpersonal Support      |                             |
| 11 |                  |                 | anticipated causes                  | Evaluation List (72)       |                             |
| 12 |                  |                 | <i>n</i> = 9 bereaved by natural    | Impact of Event Scale (64) |                             |
| 13 |                  |                 | unanticipated causes                | Grief Recovery Questions   |                             |
| 14 |                  |                 | <i>n</i> = 16 bereaved by accident  | (73)                       |                             |
| 15 |                  |                 | <i>n</i> = 9 bereaved suicide       |                            |                             |
| 16 |                  |                 | <i>n</i> = 9 bereaved by homicide   |                            |                             |
| 17 |                  |                 | Gender not stated                   |                            |                             |
| 18 |                  |                 |                                     |                            |                             |
| 19 |                  |                 |                                     |                            |                             |
| 20 |                  |                 |                                     |                            |                             |
| 21 |                  |                 |                                     |                            |                             |
| 22 |                  |                 |                                     |                            |                             |
| 23 |                  |                 |                                     |                            |                             |
| 24 |                  |                 |                                     |                            |                             |
| 25 |                  |                 |                                     |                            |                             |
| 26 |                  |                 |                                     |                            |                             |
| 27 | Thompson & Range | Quantitative    | <i>N</i> = 92 undergraduate college | Impact of Event Scale (64) | Non-bereaved participants   |
| 28 | (1990) (74)      |                 | students                            |                            |                             |
| 29 |                  | Yoked design    |                                     | Scale for Prediction of    |                             |
| 30 | USA              |                 | <i>n</i> = 10 death by suicide      | Outcome after              |                             |
| 31 |                  |                 | <i>n</i> = 11 death by accident     | Bereavement (75)           |                             |
| 32 |                  |                 | <i>n</i> = 12 Death by anticipated  | Perceived Social Support   |                             |
| 33 |                  |                 | natural causes                      | Scale (76)                 |                             |
| 34 |                  |                 |                                     |                            |                             |
| 35 |                  |                 |                                     |                            |                             |
| 36 |                  |                 |                                     |                            |                             |
| 37 |                  |                 |                                     |                            |                             |
| 38 |                  |                 |                                     |                            |                             |
| 39 |                  |                 |                                     |                            |                             |
| 40 |                  |                 |                                     |                            |                             |
| 41 |                  |                 |                                     |                            |                             |
| 42 |                  |                 |                                     |                            |                             |
| 43 |                  |                 |                                     |                            |                             |
| 44 |                  |                 |                                     |                            |                             |
| 45 |                  |                 |                                     |                            |                             |
| 46 |                  |                 |                                     |                            |                             |

1  
2  
3  
4  
5  
6  
7  
8  
9  
10  
11  
12  
13  
14  
15  
16  
17  
18  
19  
20  
21  
22  
23  
24  
25  
26  
27  
28  
29  
30  
31  
32  
33  
34  
35  
36  
37  
38  
39  
40  
41  
42  
43  
44  
45  
46

|                              |              |                                                                                                                                                               |                                                                                                                             |                                                                                                                                                                        |
|------------------------------|--------------|---------------------------------------------------------------------------------------------------------------------------------------------------------------|-----------------------------------------------------------------------------------------------------------------------------|------------------------------------------------------------------------------------------------------------------------------------------------------------------------|
|                              |              | <i>n</i> = 13 death by unanticipated natural causes                                                                                                           |                                                                                                                             |                                                                                                                                                                        |
|                              |              | Mean age: 20.25 years.                                                                                                                                        |                                                                                                                             |                                                                                                                                                                        |
|                              |              | <i>n</i> = 36 Male (39%)                                                                                                                                      |                                                                                                                             |                                                                                                                                                                        |
|                              |              | <i>n</i> = 56 Female (61%)                                                                                                                                    |                                                                                                                             |                                                                                                                                                                        |
| Thompson & Range (1993) (77) | Quantitative | <i>N</i> = 112 undergraduate college students                                                                                                                 | Impact of Event Scale (64)                                                                                                  | Individuals bereaved by suicide remembered receiving support that was unhelpful and filled with blame while the non-bereaved individuals imagined giving more support. |
| USA                          | Yoked design | <i>n</i> = 18 bereaved by suicide                                                                                                                             | Multiple Affect Adjective Check List-Revised Perceived Recovery (78)                                                        |                                                                                                                                                                        |
|                              |              | <i>n</i> = 13 bereaved by accident                                                                                                                            | Interpersonal Support Evaluation List (72)                                                                                  |                                                                                                                                                                        |
|                              |              | <i>n</i> = 10 bereaved by anticipated natural causes                                                                                                          | Perceived Recovery (75)                                                                                                     |                                                                                                                                                                        |
|                              |              | <i>n</i> = 10 bereaved by unanticipated natural causes                                                                                                        | Perceived Social Support Scale (76)                                                                                         |                                                                                                                                                                        |
|                              |              | <i>n</i> = 5 bereaved by homicide                                                                                                                             | Helpful/Unhelpful Support (79)                                                                                              |                                                                                                                                                                        |
|                              |              | Mean age: 20.5 years old                                                                                                                                      | Theoretically based guidelines for scoring facilitativeness of support developed from interviews with bereaved persons (80) |                                                                                                                                                                        |
|                              |              | <i>n</i> = 32 Male (29%)                                                                                                                                      |                                                                                                                             |                                                                                                                                                                        |
|                              |              | <i>n</i> = 80 Female (71%)                                                                                                                                    |                                                                                                                             |                                                                                                                                                                        |
|                              |              | An Imagined Group ( <i>n</i> =56 potential comforters) reported no bereavement within the past two years and no experience of comforting a bereaved person in | Scale for Prediction of Outcome after                                                                                       |                                                                                                                                                                        |

the past year. Each person was individually matched on gender and age to a bereaved person.

Bereavement adapted from Parkes (81)

Thornton et al  
(1989) (82)

Quantitative

*N* = 89 undergraduate university students

Personal and social role functioning questions adapted from Hammen and Peters (1979) (83)

When death was caused by suicide males were perceived better as a close friend or club member than females. When a child or adolescent died by suicide, more blame was attributed to the griever.

USA

Descriptive

*n* = 28 Male (31%)

*n* = 61 Female (69%)

The participants perceived the deceased was as having been more psychologically unstable when death was by

suicide rather than by illness.

---

\*Note: these six articles are part of a single study by Pitman and colleagues

## Preferred Reporting Items for Systematic reviews and Meta-Analyses extension for Scoping Reviews (PRISMA-ScR) Checklist

| SECTION                                               | ITEM | PRISMA-ScR CHECKLIST ITEM                                                                                                                                                                                                                                                                                  | REPORTED ON PAGE #                  |
|-------------------------------------------------------|------|------------------------------------------------------------------------------------------------------------------------------------------------------------------------------------------------------------------------------------------------------------------------------------------------------------|-------------------------------------|
| <b>TITLE</b>                                          |      |                                                                                                                                                                                                                                                                                                            |                                     |
| Title                                                 | 1    | Identify the report as a scoping review.                                                                                                                                                                                                                                                                   | 1                                   |
| <b>ABSTRACT</b>                                       |      |                                                                                                                                                                                                                                                                                                            |                                     |
| Structured summary                                    | 2    | Provide a structured summary that includes (as applicable): background, objectives, eligibility criteria, sources of evidence, charting methods, results, and conclusions that relate to the review questions and objectives.                                                                              | 1, 2                                |
| <b>INTRODUCTION</b>                                   |      |                                                                                                                                                                                                                                                                                                            |                                     |
| Rationale                                             | 3    | Describe the rationale for the review in the context of what is already known. Explain why the review questions/objectives lend themselves to a scoping review approach.                                                                                                                                   | 2, 3, 4,5                           |
| Objectives                                            | 4    | Provide an explicit statement of the questions and objectives being addressed with reference to their key elements (e.g., population or participants, concepts, and context) or other relevant key elements used to conceptualize the review questions and/or objectives.                                  | 4                                   |
| <b>METHODS</b>                                        |      |                                                                                                                                                                                                                                                                                                            |                                     |
| Protocol and registration                             | 5    | Indicate whether a review protocol exists; state if and where it can be accessed (e.g., a Web address); and if available, provide registration information, including the registration number.                                                                                                             | A protocol exists but not published |
| Eligibility criteria                                  | 6    | Specify characteristics of the sources of evidence used as eligibility criteria (e.g., years considered, language, and publication status), and provide a rationale.                                                                                                                                       | 5,6                                 |
| Information sources*                                  | 7    | Describe all information sources in the search (e.g., databases with dates of coverage and contact with authors to identify additional sources), as well as the date the most recent search was executed.                                                                                                  | 6,7                                 |
| Search                                                | 8    | Present the full electronic search strategy for at least 1 database, including any limits used, such that it could be repeated.                                                                                                                                                                            | 6,7                                 |
| Selection of sources of evidence†                     | 9    | State the process for selecting sources of evidence (i.e., screening and eligibility) included in the scoping review.                                                                                                                                                                                      | 6, 7                                |
| Data charting process‡                                | 10   | Describe the methods of charting data from the included sources of evidence (e.g., calibrated forms or forms that have been tested by the team before their use, and whether data charting was done independently or in duplicate) and any processes for obtaining and confirming data from investigators. | 7                                   |
| Data items                                            | 11   | List and define all variables for which data were sought and any assumptions and simplifications made.                                                                                                                                                                                                     | 5, 6                                |
| Critical appraisal of individual sources of evidence§ | 12   | If done, provide a rationale for conducting a critical appraisal of included sources of evidence; describe the methods used and how this information was used in any data synthesis (if appropriate).                                                                                                      | 7                                   |



| SECTION                                       | ITEM | PRISMA-ScR CHECKLIST ITEM                                                                                                                                                                       | REPORTED ON PAGE # |
|-----------------------------------------------|------|-------------------------------------------------------------------------------------------------------------------------------------------------------------------------------------------------|--------------------|
| Synthesis of results                          | 13   | Describe the methods of handling and summarizing the data that were charted.                                                                                                                    | 8                  |
| <b>RESULTS</b>                                |      |                                                                                                                                                                                                 |                    |
| Selection of sources of evidence              | 14   | Give numbers of sources of evidence screened, assessed for eligibility, and included in the review, with reasons for exclusions at each stage, ideally using a flow diagram.                    | 2, 7, 8            |
| Characteristics of sources of evidence        | 15   | For each source of evidence, present characteristics for which data were charted and provide the citations.                                                                                     | 2, 6, 7, 8, 9      |
| Critical appraisal within sources of evidence | 16   | If done, present data on critical appraisal of included sources of evidence (see item 12).                                                                                                      | 7                  |
| Results of individual sources of evidence     | 17   | For each included source of evidence, present the relevant data that were charted that relate to the review questions and objectives.                                                           | 8-12               |
| Synthesis of results                          | 18   | Summarize and/or present the charting results as they relate to the review questions and objectives.                                                                                            | 8-12               |
| <b>DISCUSSION</b>                             |      |                                                                                                                                                                                                 |                    |
| Summary of evidence                           | 19   | Summarize the main results (including an overview of concepts, themes, and types of evidence available), link to the review questions and objectives, and consider the relevance to key groups. | 1, 12-14           |
| Limitations                                   | 20   | Discuss the limitations of the scoping review process.                                                                                                                                          | 1, 14              |
| Conclusions                                   | 21   | Provide a general interpretation of the results with respect to the review questions and objectives, as well as potential implications and/or next steps.                                       | 1, 14              |
| <b>FUNDING</b>                                |      |                                                                                                                                                                                                 |                    |
| Funding                                       | 22   | Describe sources of funding for the included sources of evidence, as well as sources of funding for the scoping review. Describe the role of the funders of the scoping review.                 | 15                 |

JBI = Joanna Briggs Institute; PRISMA-ScR = Preferred Reporting Items for Systematic reviews and Meta-Analyses extension for Scoping Reviews.

\* Where *sources of evidence* (see second footnote) are compiled from, such as bibliographic databases, social media platforms, and Web sites.

† A more inclusive/heterogeneous term used to account for the different types of evidence or data sources (e.g., quantitative and/or qualitative research, expert opinion, and policy documents) that may be eligible in a scoping review as opposed to only studies. This is not to be confused with *information sources* (see first footnote).

‡ The frameworks by Arksey and O'Malley (6) and Levac and colleagues (7) and the JBI guidance (4, 5) refer to the process of data extraction in a scoping review as data charting.

§ The process of systematically examining research evidence to assess its validity, results, and relevance before using it to inform a decision. This term is used for items 12 and 19 instead of "risk of bias" (which is more applicable to systematic reviews of interventions) to include and acknowledge the various sources of evidence that may be used in a scoping review (e.g., quantitative and/or qualitative research, expert opinion, and policy document).

From: Tricco AC, Lillie E, Zarin W, O'Brien KK, Colquhoun H, Levac D, et al. PRISMA Extension for Scoping Reviews (PRISMA-ScR): Checklist and Explanation. *Ann Intern Med.* 2018;169:467–473. doi: [10.7326/M18-0850](https://doi.org/10.7326/M18-0850).

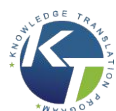

St. Michael's

Inspired Care.  
Inspiring Science.

For peer review only - <http://bmjopen.bmj.com/site/about/guidelines.xhtml>

# BMJ Open

## Suicide postvention for staff and students on university campuses: A scoping review

|                                 |                                                                                                                                                                                                                                                                                                                                                         |
|---------------------------------|---------------------------------------------------------------------------------------------------------------------------------------------------------------------------------------------------------------------------------------------------------------------------------------------------------------------------------------------------------|
| Journal:                        | <i>BMJ Open</i>                                                                                                                                                                                                                                                                                                                                         |
| Manuscript ID                   | bmjopen-2022-068730.R2                                                                                                                                                                                                                                                                                                                                  |
| Article Type:                   | Original research                                                                                                                                                                                                                                                                                                                                       |
| Date Submitted by the Author:   | 10-May-2023                                                                                                                                                                                                                                                                                                                                             |
| Complete List of Authors:       | Allie, Sophia-Lorraine; Stellenbosch University, Psychology<br>Bantjes, Jason; South African Medical Research Council, Alcohol, Tobacco and Other Drug Research Unit; Stellenbosch University, Department of Global Health<br>Andriessen, Karl; The University of Melbourne, Centre for Mental Health, Melbourne School of Population and Global Health |
| <b>Primary Subject Heading</b>: | Mental health                                                                                                                                                                                                                                                                                                                                           |
| Secondary Subject Heading:      | Public health, Health policy                                                                                                                                                                                                                                                                                                                            |
| Keywords:                       | Suicide & self-harm < PSYCHIATRY, EDUCATION & TRAINING (see Medical Education & Training), Adult psychiatry < PSYCHIATRY                                                                                                                                                                                                                                |
|                                 |                                                                                                                                                                                                                                                                                                                                                         |

SCHOLARONE™  
Manuscripts



I, the Submitting Author has the right to grant and does grant on behalf of all authors of the Work (as defined in the below author licence), an exclusive licence and/or a non-exclusive licence for contributions from authors who are: i) UK Crown employees; ii) where BMJ has agreed a CC-BY licence shall apply, and/or iii) in accordance with the terms applicable for US Federal Government officers or employees acting as part of their official duties; on a worldwide, perpetual, irrevocable, royalty-free basis to BMJ Publishing Group Ltd ("BMJ") its licensees and where the relevant Journal is co-owned by BMJ to the co-owners of the Journal, to publish the Work in this journal and any other BMJ products and to exploit all rights, as set out in our [licence](#).

The Submitting Author accepts and understands that any supply made under these terms is made by BMJ to the Submitting Author unless you are acting as an employee on behalf of your employer or a postgraduate student of an affiliated institution which is paying any applicable article publishing charge ("APC") for Open Access articles. Where the Submitting Author wishes to make the Work available on an Open Access basis (and intends to pay the relevant APC), the terms of reuse of such Open Access shall be governed by a Creative Commons licence – details of these licences and which [Creative Commons](#) licence will apply to this Work are set out in our licence referred to above.

Other than as permitted in any relevant BMJ Author's Self Archiving Policies, I confirm this Work has not been accepted for publication elsewhere, is not being considered for publication elsewhere and does not duplicate material already published. I confirm all authors consent to publication of this Work and authorise the granting of this licence.



---

# Suicide postvention for staff and students on university campuses: A scoping review

## AUTHORS

Sophia-Lorraine Allie<sup>1</sup> Jason Bantjes<sup>2,3,4</sup> Karl Andriessen<sup>5</sup>

1. Department of Psychology, Faculty of Arts and Social Sciences, Stellenbosch University, Stellenbosch, South Africa.

2. Alcohol, Tobacco and Other Drug Research Unit, South African Medical Research Council.

3. Department of Global Health, Faculty of Medicine and Health Sciences, Stellenbosch University.

4. Dept of Psychiatry and Mental Health, University of Cape Town, South Africa.

5. Centre for Mental Health, Melbourne School of Population and Global Health, The University of Melbourne, Melbourne, Australia.

Corresponding author: Sophia-Lorraine Allie, Department of Psychology, Faculty of Arts and Social Sciences, Stellenbosch University, Stellenbosch, South Africa.

[sophialorraine.allie@gmail.com](mailto:sophialorraine.allie@gmail.com) / [21725411@sun.ac.za](mailto:21725411@sun.ac.za)

## ABSTRACT

**Objective:** To examine current knowledge about suicide bereavement and postvention interventions for university staff and students.

**Design:** Scoping review

**Data sources and eligibility:** We conducted systematic searches in 12 electronic databases (PubMed, PsycINFO, MEDLINE, CINAHL, Africa-Wide Information, PsycARTICLES, Health Source: Nursing/Academic Edition, Academic Search Premier, SocINDEX through the EBSCOHOST platform; Cochrane Library, Web of Science, SCOPUS), hand searched lists of references of included articles, and

1  
2  
3 consulted with library experts during September 2021 and June 2022. Eligible studies  
4 were screened against the inclusion criteria independently by two reviewers. Only  
5 studies published in English were included.  
6  
7

8  
9 **Data extraction and synthesis:** Screening was conducted by two independent  
10 reviewers following a 3-step article screening process. Biographical data and study  
11 characteristics were extracted using a data extraction form and synthesised.  
12  
13

14  
15 **Results:** Our search strategy identified 7691 records from which 3170 abstracts were  
16 screened. We assessed 29 full texts and included 17 articles for the scoping review.  
17 All studies were from high-income countries (United States of America, Canada,  
18 United Kingdom). The review identified no postvention intervention studies on  
19 university campuses. Study designs were mostly descriptive quantitative, or mixed  
20 methods. Data collection and sampling were heterogeneous.  
21  
22

23  
24 **Conclusion:** Staff and students require support measures due to the impact of suicide  
25 bereavement and the unique nature of the university context. There is a need for  
26 further research to move from descriptive studies to focus on intervention studies,  
27 particularly at universities in low-and-middle-income countries.  
28  
29  
30  
31  
32  
33

## 34 35 36 37 38 **STRENGTHS AND LIMITATIONS OF THIS STUDY**

- 39 • The review focused on postvention interventions for both staff and students on  
40 university campuses globally.
- 41 • This scoping review was based on a robust methodology for conducting  
42 scoping reviews.
- 43 • The selection process of eligible articles and data extraction was conducted  
44 independently by two researchers.
- 45 • The review provides a synthesis and critical examination of the postvention  
46 research and practice on university campuses.
- 47 • The scoping review was limited to peer-reviewed articles and primary studies  
48 published in English where grey literature was excluded.  
49  
50  
51  
52  
53  
54  
55  
56  
57  
58  
59  
60

---

## INTRODUCTION

Despite the decrease in suicide rates globally (1), there has been an increase in suicide among university students in recent years (2, 3). There is a growing concern over the mental health of university students, with various studies identifying that mental disorders and suicide are higher among university students than the general population (4-9). Suicide has been identified as the fourth leading cause of death among 15 to 29-year-olds globally (1). Pillay (2) identified that suicide risk is greatest among students when they face challenges in multiple areas. Some risk factors for student suicide include being black/belonging to a minority group; non-heteronormative sexual orientation; poor socio-economic background; mental disorders; academic pressure, and financial concerns (2, 5, 10, 11).

The transition to university life normally coincides with the transition into adulthood, which comes with various challenges and stressors for students, such as leaving home for the first time, financial concerns, including balancing employment with academic demands (3, 12, 13). Although changes to the higher education sector mean that not all students attend residential universities and live on campus (14, 15), some students spend most of their time on campus, especially if they are in residential accommodation (14, 15). Given this context, a suicide on campus can be experienced as a community trauma and may be the first time a student encounters a peer's death compared to a family member's death (14). Students may experience a range of emotional responses, such as shock, depression, fear, anger and loneliness (14). Internal and external factors such as gender, sociocultural background, religious factors and belief in the afterlife contribute to these emotional responses (14, 15).

Literature often refers to those bereaved by suicide as "suicide survivors" or "survivors of suicide" to describe those who have been bereaved by suicide (16-19). We intentionally chose to use the descriptor "students bereaved by suicide" and its variations to improve clarity. Students bereaved by suicide face a heightened risk for mental disorders, substance use and suicide (20). Suicide bereavement can have a negative impact on physical and psychological well-being over the life-course, such as increased risk of depression and death by suicide (21). The impact of suicide on

1  
2  
3 campus is therefore considered more widespread than a suicide in the general  
4 population (22, 23).  
5  
6

7  
8 Since students spend most of their time at universities, staff can be considered among the  
9 bereaved affected by student suicide. Although there is a dearth of research on the impact of  
10 suicide on university staff, research in schools shows that teachers bereaved by suicide reported  
11 significant distress and lack of support (24, 25). When a student dies, the place of work  
12 becomes the place of loss for teaching staff who are now also responsible for teaching  
13 grieving students (26). Suicide bereavement significantly impacts bereaved staff and  
14 students' interpersonal relationships (partners, close friends and family). This includes  
15 feeling discomfort over the death due to stigma or taboo, and a loss of social  
16 confidence leading to social withdrawal (25, 27).  
17  
18  
19  
20  
21  
22  
23

24  
25 Suicide prevention strategies recommend providing postvention, defined as the care  
26 and support activities offered to those who have been bereaved by suicide to promote  
27 recovery and prevent adverse outcomes regarding their grief and mental health (28-  
28 30). Five systematic reviews have been conducted on postvention interventions to  
29 date (31-35). These systematic reviews identify some elements of postvention that  
30 have been found useful such as proactive support immediately following a suicide,  
31 counselling, cognitive behavioural approaches, gate-keeper training and bereavement  
32 groups (31, 34-37). Szumilas (31) has asserted that schools should be a site for  
33 targeted postvention interventions, an argument which can be extended to university  
34 campuses. Although schools and universities share similar characteristics, in that they  
35 are both educational institutions, they also have unique needs. Due to the  
36 developmental stage (12, 13) and the prevalence of mental disorders and suicide  
37 among university students (6, 9, 38), it is important to identify postvention interventions  
38 specific to university students and with it, the impact of suicide bereavement on  
39 university students.  
40  
41  
42  
43  
44  
45  
46  
47  
48  
49  
50

51  
52 This scoping review aimed to answer the following question: *“What is known about*  
53 *suicide bereavement and postvention interventions for staff and students at*  
54 *universities?”*. The term universities will be used to refer to all higher education  
55 institutions (HEI's) throughout. The objectives of the review were to: (i) describe the  
56 impact of suicide bereavement on staff and students at universities; (ii) identify  
57 institutional responses to suicide bereavement at universities; (iii) describe  
58  
59  
60

1  
2  
3 postvention interventions at universities. Answering this question and objectives may  
4 provide a first step in developing recommendations for further research and guidelines  
5 that could assist universities in decision making and most appropriate action following  
6 a student suicide.  
7  
8  
9

## 10 11 12 13 14 **METHODS**

15  
16 This scoping review was conducted using the Joanna Briggs Institute (JBI) guideline  
17 for scoping reviews (39), which builds on the seminal work of Arksey and O'Malley  
18 (40) as well as Levac and colleagues (41). The review is reported using the Preferred  
19 Reporting Items for Systematic Reviews and Meta-Analyses Extension for Scoping  
20 Reviews (PRISMA-ScR) checklist (26), which is congruent with the JBI guidelines. A  
21 review protocol was developed but not published (see supplementary file). The  
22 research question and objectives were developed through an iterative process  
23 involving discussion and collaboration of the three authors (SA, JB, KA).  
24  
25  
26  
27  
28  
29

30  
31 The scoping review parameters were determined using the "PCC" framework as  
32 outlined by the JBI guideline on scoping reviews (39):  
33  
34  
35

### 36 37 **Participants**

38  
39 The scoping review focussed on staff (both academic and non-academic) who were  
40 employed at universities or institutions of higher learning in any capacity. Students  
41 (undergraduate and postgraduate) at universities or institutions of higher learning were  
42 also be included.  
43  
44  
45

### 46 47 **Concept**

48  
49 The concept of interest for this scoping review was suicide bereavement and  
50 postvention interventions and activities that are related to support for staff and  
51 students following suicide on campus.  
52  
53  
54  
55  
56  
57  
58  
59  
60

---

## Context

Studies where research was done on university campuses, or the focus of the research includes staff and students on university campuses or institutions of higher learning globally were included in this scoping review.

## Patient and public involvement

Patients or the public were not involved in the design or conduct of this scoping review. The experiences of the authors working with university students informed the need to explore the review question.

## Search Strategy

As recommended by the JBI guideline (39), a three-step search strategy was utilised. Firstly, the first author (SA) conducted a preliminary search of Academic Search Premier and PubMed to identify relevant articles in August 2021. SA consulted two expert librarians at Stellenbosch University, to develop a comprehensive search strategy using the words contained in the titles and abstracts of relevant articles and index terms used to describe articles. The two librarians and KA also conducted the searches independently to ensure that the search string was accurate and no errors were identified. The search string comprised a variety of search terms, including MeSH terms, synonyms and variant spellings, connected by Boolean operators. All identified keywords and index terms were included, and this search string (see Table 1) was used across the following databases: PubMed, PsycINFO, MEDLINE, CINAHL, Africa-Wide Information, PsycARTICLES, Health Source: Nursing/Academic Edition, Academic Search Premier, SocINDEX (EBSCOHOST); Cochrane Library, Web of Science, SCOPUS. These databases were selected because they provide a wide range of interdisciplinary literature. In PubMed the following words were filtered using title/abstract: suicide[tiab], (postvention[tiab] , “psychosocial intervention”[tiab], "post suicide"[tiab]. The searches were not limited by date of publication or location, but were limited to publications in English. We elected to include only peer-reviewed articles to ensure credible studies were included. The reference lists of included full-text articles and systematic reviews were hand searched for additional references.

**Table 1. Search string used across databases**

| Search string                                                                                                                                                                                                                                                                                                                                                                                                                                                                                                                               |
|---------------------------------------------------------------------------------------------------------------------------------------------------------------------------------------------------------------------------------------------------------------------------------------------------------------------------------------------------------------------------------------------------------------------------------------------------------------------------------------------------------------------------------------------|
| ("college student" OR "university student" OR undergraduate OR postgraduate OR lecturer OR faculty OR "administrative staff" OR "administrative personnel" OR "support staff" OR "educational personnel") AND suicide AND (postvention OR intervention OR bereavement OR grief OR debrief OR debriefing OR "crisis intervention" OR "psychosocial intervention" OR "support after suicide" OR "survivors after suicide" OR "post suicide") AND (university OR college OR "institution of higher learning" OR campus OR "higher education"). |

## Study selection

SA conducted the searches (with the assistance of the two librarians and KA) in September 2021 and updated them in June 2022. We followed two independent screening levels for selecting studies for inclusion. Table 2. outlines the inclusion criteria.

**Table 2. Inclusion criteria**

| Inclusion                                                                                                                                                                                                                                                                                                                    |
|------------------------------------------------------------------------------------------------------------------------------------------------------------------------------------------------------------------------------------------------------------------------------------------------------------------------------|
| i. The study population consists of university/HEI students and staff. If a study included other populations such as secondary students, and we could not differentiate the results, it was excluded. If the differentiation of the results was clear that they belonged to university students, it would have been included |
| ii. The study report data on suicide bereavement or postvention interventions for university/HEI students or staff                                                                                                                                                                                                           |
| iii. The study used qualitative, quantitative or mixed methods as primary research (no study design limitation imposed)                                                                                                                                                                                                      |
| iv. The study was published in English as a peer-reviewed paper                                                                                                                                                                                                                                                              |

The first level was a title and abstract review, and the second was a full-text review. For the first level of review, Researcher SA uploaded all identified citations from the database searches into EndNote (40) and removed duplicates. Thereafter, SA imported all citations into Rayyan QCRI (41) and removed further duplicates identified by Rayyan QCRI (41). Two reviewers (SA and EB) screened and selected titles and abstracts independently according to the inclusion criteria. Twenty-nine (n=29) full-text articles were assessed with 17 articles included in the final review. Ten disagreements

1  
2  
3 on study selection were resolved through a consensus discussion. Reasons for  
4 disagreement included lack of clarity regarding the study population or whether a study  
5 was a peer-reviewed publication. Figure 1. summarises the search and selection  
6 process (42)  
7  
8  
9

## 10 11 **Data extraction** 12

13  
14 The researchers developed and piloted a Microsoft Excel data extraction form based  
15 on JBI data extraction template (39, 43). After piloting the tool, the researchers knew  
16 to include the three aspects which formed the basis of the three objectives (impact of  
17 suicide bereavement, postvention interventions at the university and institutional  
18 response). Researcher SA extracted information on author, year, journal, affiliation,  
19 country of origin, country income group according to the World Bank classification (44),  
20 aims, population characteristics, core data on methodology and key findings from each  
21 of the 17 included articles. In line with the review aims, information on postvention  
22 interventions, definitions of postvention, impact of suicide bereavement, institutional  
23 responses, practice implications and recommendations for further development were  
24 also extracted. An audit was done by EB on all the articles to ensure the accuracy of  
25 extracted data. No errors were identified. Supplementary Table 1 provides an overview  
26 of the included studies.  
27  
28  
29  
30  
31  
32  
33  
34  
35  
36  
37

## 38 **Quality assessment** 39

40 SA conducted a quality assessment by using an adaptation of the JBI critical appraisal  
41 checklists (45). This quality assessment was audited by ZS. Each item on the checklist  
42 was given 1 if scored 'yes' or 0 if scored 'no'(45). A total score was calculated for each  
43 study which resulted in an overall rating against set criteria of poor quality (less than  
44 50%), moderate quality (50%-80%) and high quality (81%-100%). Most studies  
45 received a rating of moderate quality (n=15) and two were low quality. No studies were  
46 excluded due to study quality.  
47  
48  
49  
50  
51  
52  
53

## 54 **Data synthesis** 55

56 Data were summarised into a descriptive and narrative synthesis due to the variation  
57 in study designs to answer the following questions from university settings: describe  
58 the impact of suicide bereavement on staff and students at universities; identify  
59  
60



1  
2  
3 institutional responses to suicide bereavement at universities and describe  
4 postvention interventions at universities. Results are presented firstly as a descriptive  
5 numerical summary (46) (study characteristics) followed by key findings from the  
6 included studies.  
7  
8  
9

## 10 11 12 **RESULTS**

### 13 14 **Study characteristics**

15  
16 The included articles were published between 1989 and 2021 (Supplementary Table  
17 1). Most articles (n=8) were from the USA (47-53), seven articles from the UK (54-60)  
18 and two from Canada (61, 62). The article study designs included ten quantitative  
19 studies (48, 49, 51-53, 55, 57, 61-63) involving the use of surveys; two qualitative  
20 studies using grounded theory and phenomenological approaches (50, 54) which  
21 collected data using semi-structured interviews. Five mixed-methods studies used a  
22 combination of questionnaires, (47, 56, 58-60) interviews, (47, 59) and open-ended  
23 qualitative questions (56, 58-60). Studies that were quantitative or had a quantitative  
24 element, used a range of existing outcome measures or developed measures to  
25 capture data on grief reactions (47, 51, 55, 57, 61, 62), impact of suicide bereavement  
26 (48, 49, 51-53, 55-63) and suicidal behaviours (49) Supplementary Table 1 outlines  
27 the outcome measures in greater detail.  
28  
29  
30  
31  
32  
33  
34  
35  
36  
37

38  
39 Most articles (n=13) identified participants bereaved by suicide through surveys. Two  
40 articles (47, 63) recruited students as participants to evaluate their personal responses  
41 to those bereaved by suicide. The other two articles (50, 54) were qualitative in nature  
42 and staff participants were purposively selected as those exposed to student suicide.  
43 All study participants were adults at HEI's and ranged between 18 and 70 years old.  
44 Most of the articles (n=14), except one, (47) had more female participants than male  
45 participants. Two articles (50, 51) did not state the gender profile of the participants.  
46 Many of the articles focused on the perspectives of students (n=9) (47-49, 51-53, 61-  
47 63) or both staff and student perspectives (n=6) (55-60) with only two (50, 54) focusing  
48 exclusively on the perspectives of staff. Most of the articles (n=16) explored the  
49 concept of suicide bereavement. We found no published articles which investigated  
50 postvention interventions in university settings.  
51  
52  
53  
54  
55  
56  
57  
58  
59  
60

---

## Key findings from included articles

Supplementary Table 1 provides a summary of the key findings of the 17 included articles arranged methodologically. The findings presented below are organised around the review objectives under the headings of: the impact of suicide bereavement on staff and students at universities, institutional responses to suicide bereavement at universities and postvention interventions at universities.

### The impact of suicide bereavement on staff and students at universities

Students bereaved by suicide experienced higher levels of general grief reactions compared to those bereaved by other means such as natural causes or accidents (51, 61). In one study, the Scale for Prediction of Outcome After Bereavement (SPOB) (64) was used to predict the outcome of bereavement on students. The SPOB predicted that those students who were suicide bereaved would have difficulty returning to baseline functioning (52). Staff and students had increased suicidal ideation or attempted suicide following their bereavement, and most of them had not sought help for any episode of self-harm or suicidal ideation (57). As a result of their bereavement experience, for some staff and students (25%) who had never considered suicide as an option, suicide became more normalised. This fostered awareness that suicide could provide a way out of extreme distress for themselves or others (56). They suddenly had a new awareness that in a state of extreme distress, they, or anyone they knew, could be vulnerable to suicide (56). In contrast, half of the staff and students expressed a conviction that they would prevent dying by suicide themselves due to the impact they had witnessed and experienced following a suicide death (56).

For students bereaved by suicide, there was a need to understand the death and the reasons that led to the deceased taking their own life (49, 51, 61). It is as if they needed this explanation to make sense of the suicide. They also felt responsibility that they could have done something to prevent the suicide, and this led to feelings of guilt (49, 51, 55, 61). Some respondents felt like the deceased was punishing them by dying and felt rejected by the deceased (51, 61). Students bereaved by suicide experienced shame and embarrassment which set them apart from other students who mourn non-suicidal deaths (51, 61) They had more perceived stigma (49, 55, 61) and often felt that other people, especially friends, did not understand their feelings about the suicide

1  
2  
3 death, putting a strain on relationships (49, 55). Staff and students reported that they  
4 avoided using the word 'suicide' as it made other people feel uncomfortable and  
5 concealed the cause of death for the same reasons. They also felt the social pressure  
6 to no longer be affected by the suicide, so they learnt to hide their expressions of grief  
7 (59, 60).  
8  
9  
10  
11  
12

13 Staff reported physical and psychological responses to student suicide that impacted  
14 their personal and professional lives. Firstly, there were the practical tasks to take care  
15 of following the death of a student, such as packing up belongings, and initiating  
16 administrative processes. Some staff reported that they began to question themselves  
17 at perhaps having missed something with the students or not having done more to  
18 prevent the suicide (54). Grief following suicide bereavement impacted on staff's  
19 abilities to function in the workplace. Staff reported feeling profound sadness,  
20 confusion, anxiety, and poor concentration. This led to poor work quality, difficulty  
21 working in a team and the loss of self-confidence (58). A small group of staff and  
22 students cited an unexpected impact of suicide bereavement in their work. They stated  
23 that they used work as a distraction to cope with their emotions and work was also  
24 used as a way to make the deceased proud of them (58). Furthermore, the experience  
25 of suicide bereavement motivated some of the staff and students to change to careers  
26 related to mental health or caring for vulnerable persons (58).  
27  
28  
29  
30  
31  
32  
33  
34  
35  
36  
37  
38  
39  
40  
41

### 42 **Institutional responses to suicide bereavement at universities**

43

44 There were varying views on support received and accessed, with staff citing that  
45 institutional processes were unsupportive to staff in a culture that values student  
46 mental well-being over staff well-being (58). Staff further described a lack of  
47 institutional support offered or available where managers were insensitive to their  
48 needs (58). Within work settings, both staff and students described institutional  
49 practices that were unsupportive to their grieving process, such as systems for taking  
50 compassionate leave where one had to produce a death certificate, additional work  
51 responsibilities because of taking time off and difficulty catching up due to decreased  
52 work capacity (58). Furthermore, university administrators identified challenges to  
53 responding appropriately to student suicide on campus. These included a lack of  
54  
55  
56  
57  
58  
59  
60

1  
2  
3 postvention training received as part of their role and challenges around notification  
4 procedures communicating to the university community about the student death by  
5 suicide in a timeous manner before social media platforms shared the news, often  
6 before the family had been officially informed. Another challenge for university  
7 administrators was balancing their desire to honour the memory of the deceased  
8 student while minimising the risk of suicide contagion on campus (50).  
9  
10  
11  
12  
13  
14

15 Staff and students felt that the way that support efforts could be enhanced following  
16 suicide bereavement would be to offer support proactively and consistently over time,  
17 especially practical support (60). Practical support that was seen as valuable included  
18 childcare, help with housework and general administration. Employers and teaching  
19 staff could offer practical support by granting time off, extending deadlines and  
20 rescheduling exams (60). Staff and students could also outline their reasons for not  
21 seeking support. These included: fear of asking for support, negative experiences of  
22 previous attempts to access support, feeling that support would not benefit them and  
23 fearing judgement at their need for psychological support (60). One study found that  
24 students bereaved by suicide were less likely to receive informal support than those  
25 bereaved by natural causes (57). Another study reported that staff and students  
26 received informal support from family and friends and said this support was valuable  
27 in coping with their grief (60). Staff and students also expressed the need for  
28 professional support, but very few accessed formal support (60). Some students felt  
29 they did not receive any support and that others were unhelpful (52, 53).  
30  
31  
32  
33  
34  
35  
36  
37  
38  
39  
40  
41

## 42 **Postvention interventions at universities**

43  
44  
45 Of the 17 articles included in this scoping review, none spoke directly to any  
46 postvention interventions at the respective institutions.  
47  
48  
49

## 50 **Discussion**

51 The staff and students bereaved by suicide in this review experienced higher levels of  
52 grief reactions when compared to bereavement by non-suicide deaths impacting on  
53 their personal and occupational functioning. Despite this, the findings demonstrate  
54 how staff have been largely marginalised from this research with a focus on university  
55 students. Only two studies (50, 54) focused exclusively on staff experiences. This bias  
56  
57  
58  
59  
60

1  
2  
3 towards studying the experiences of students is understandable, given that  
4 universities are set up for students; however, it is important to include staff as they  
5 have important support needs also. The staff in this review were responsible for  
6 supporting students, attending to practical tasks and informing students following a  
7 suicide death (50, 54). This raises questions about the responsibilities and  
8 expectations placed on staff and whether these are realistic. There is increasing  
9 awareness of employer responsibilities for the health and well-being of staff and the  
10 safety of students (65).

11  
12  
13  
14  
15  
16  
17  
18  
19 Following their bereavement experience, for some staff and students, suicide became  
20 more normalised and increased their awareness that suicide could be a way out of  
21 distress (56). This has some implications for suicide contagion among university  
22 students and staff. Mueller (66) describes the suicide contagion process where the  
23 suicide attempt of a friend can transform the distant idea of suicide into a way an  
24 individual can express themselves. Miklin and Mueller (67) further identify that suicide  
25 bereavement in itself is not inherently risky, but it is how the bereaved person makes  
26 sense of the suicide that may contribute to the risk. Among the staff and students in  
27 this review, there was a need to make sense of the suicide (49, 51). This element for  
28 support may need to be considered in any potential interventions for staff and  
29 students. Recently, some evidence has pointed to peer-led interventions as a way to  
30 support those bereaved by suicide or experiencing suicidality (68, 69). This creates an  
31 opportunity for these peer-led interventions to be used with university students and  
32 staff.

33  
34  
35  
36  
37  
38  
39  
40  
41  
42  
43 Staff and students experienced support as both helpful and unhelpful. This creates an  
44 opportunity for support measures to be enhanced and access to support improved,  
45 especially through strategies that reduce the social stigma attached to accessing  
46 mental health services (2). One way to improve access is through using online support  
47 services such as online forums (70, 71) or remote services (72).

48  
49  
50  
51  
52  
53  
54  
55  
56  
57  
58  
59  
60  
The articles that reported the gender profile of participants had more female than male  
respondents, a trend that has also been observed in suicide bereavement literature  
more broadly (73, 74). In published suicide research there is a gender imbalance with  
60 percent to 90 percent of participants identifying as women (75). This introduces  
bias because only women are reporting on the suicide bereavement experience.

1  
2  
3 Future research should explore the perspectives of males and gender nonconforming  
4 individuals to gain a diverse perspective on the suicide bereavement experiences.  
5  
6  
7

8 A systematic mapping of postvention research over the last 50 years (76) has  
9 identified the need for more intervention studies within postvention research. This  
10 review also highlighted this gap as it did not identify studies on postvention  
11 interventions at universities. Although we primarily sought out to explore both suicide  
12 bereavement and postvention interventions among staff and students at universities,  
13 we found literature that only focuses on suicide bereavement among staff and students  
14 conducted in high-income countries. This mirrors a trend in postvention literature  
15 where 93% of research is concentrated in high-income countries, particularly (USA,  
16 UK, Canada, Australia and Sweden) (76) when 77 percent of global suicides occur in  
17 low-and-middle-income countries (1).  
18  
19  
20  
21  
22  
23  
24  
25  
26

27 The strength of this review was using a robust methodology to identify some critical  
28 gaps in the postvention literature. The findings of this review should be considered  
29 within the following limitations. The studies included in this review were limited to peer-  
30 reviewed in English, so potentially relevant articles may have been missed if they were  
31 available in another language. The inclusion of peer-review articles was to introduce  
32 a level of rigour in this scoping review. The review also captured articles from high-  
33 income countries with an inadvertent exclusion of low-middle-income countries. Grey  
34 literature was excluded and potentially relevant articles that could change the review's  
35 outcome could have been missed. Some higher education providers in other countries  
36 do not have the word "college" or "university" or "campus" or "higher education" in their  
37 descriptors. Therefore, there is the potential that some relevant studies have not been  
38 identified in this scoping review.  
39  
40  
41  
42  
43  
44  
45  
46  
47  
48  
49  
50

## 51 **Conclusion**

52 This review set out to examine suicide bereavement and postvention interventions on  
53 university campuses. The review identified studies focusing on suicide bereavement  
54 but no studies on postvention interventions on university campuses.  
55  
56

57 Nonetheless, universities have the potential to be effective sites for interventions but  
58 there is not a universal solution that will meet the needs of all institutions. HEI's are  
59  
60

1  
2  
3 not heterogeneous in nature, and this would need to be considered when designing  
4 interventions. Some HEI's have distance students, students off campus, some are  
5 small and others large. There is a need for postvention research to move beyond  
6 descriptive studies to focus on interventions.  
7  
8  
9

## 10 11 12 **ACKNOWLEDGEMENTS**

13  
14 The authors would like to thank the two subject librarians from Stellenbosch University  
15 who assisted with the search strategy: Mrs Marleen Hendriksz (Faculty of Arts and  
16 Social Sciences) and Mrs Ingrid Van der Westhuizen (Faculty of Medicine and Health  
17 Sciences). Appreciation and thanks is also extended to Dr Elsie Breet as the  
18 secondary reviewer throughout the article screening and selection process and data  
19 extraction. We are grateful for Ms Zarina Syed, who was able to assist as an auditor  
20 for the quality assessment.  
21  
22  
23  
24  
25  
26  
27

## 28 **AUTHOR CONTRIBUTIONS**

29  
30 This scoping review was developed by the intellectual contributions of all the authors.  
31 All authors were involved in developing the review question and conceptualising the  
32 approach. SA developed and tested search terms in consultation with subject  
33 librarians. SA in consultation with JB and KA developed the data extraction form. SA  
34 reviewed all articles for inclusion, and no discrepancies were referred to a third  
35 reviewer. KA and JB contributed to drafting and reviewing the manuscript prior to  
36 submission.  
37  
38  
39  
40  
41  
42  
43  
44

## 45 **FUNDING STATEMENT**

46 This scoping review is supported by the funding awarded to the first author (SA)  
47 through the National Research Foundation Doctoral Scholarship  
48 [PMDS22080147158]. KA was supported by a National Health and Medical Research  
49 Council Early Career Fellowship [1157796]. The funders had no role in the design and  
50 execution of the scoping review or in the decision to submit the manuscript for  
51 publication. The work reported herein was made possible through funding by the South  
52 African Medical Research Council (SAMRC) through its Division of Research Capacity  
53 Development under the MCSP (awarded to JB). The content hereof is the sole  
54  
55  
56  
57  
58  
59  
60

responsibility of the authors and does not necessarily represent the official views of the SAMRC.

## COMPETING INTERESTS STATEMENT

The authors declare that they have no competing interests.

## ETHICS APPROVAL

Not required

## PATIENT CONSENT FOR PUBLICATION

Not required.

## DATA SHARING STATEMENT

All data relevant to the study are included in the article or uploaded as a supplementary file.

Figure 1. PRISMA Diagram

**Word Count:** 4233



---

## REFERENCES

1. World Health Organization. Suicide Worldwide in 2019: Global Health Estimates. 2021 16 June 2021. Report No.: 9789240026643.
2. Pillay J. Suicidal behaviour among university students: A systematic review. *South African Journal of Psychology*. 2021;51(1):54-66.
3. Lindsay BL, Szeto AC. The influence of media on the stigma of suicide when a postsecondary student dies by suicide. *Archives of suicide research*. 2022:1-18.
4. Giangrasso B, Chung MC, Franzoi IG. Psychological interventions addressed to higher education students in student psychological services. *Frontiers in Psychology*. 2023;14:1129697.
5. Bantjes J, Breet E, Saal W, Lochner C, Roos J, Taljaard L, et al. Epidemiology of non-fatal suicidal behavior among first-year university students in South Africa. *Death studies*. 2019:1.
6. Auerbach RP, Mortier P, Bruffaerts R, Alonso J, Benjet C, Cuijpers P, et al. WHO World Mental Health Surveys International College Student Project: Prevalence and Distribution of Mental Disorders. *Journal of Abnormal Psychology*. 2018;127(7):623-38.
7. Mortier P, Cuijpers P, Kiekens G, Auerbach RP, Demyttenaere K, Green JG, et al. The prevalence of suicidal thoughts and behaviours among college students: a meta-analysis. *Psychol Med*. 2018;48(4):554-65.
8. Makhubela M. *Suicide and depression in university students: a possible epidemic*. SAGE Publications Sage UK: London, England; 2021. p. 3-5.
9. Bantjes J, Kessler M, Lochner C, Breet E, Bawa A, Roos J, et al. The mental health of university students in South Africa: Results of the national student survey. *Journal of Affective Disorders*. 2023;321:217-26.
10. Mortier P, Auerbach RP, Alonso J, Bantjes J, Benjet C, Cuijpers P, et al. Suicidal Thoughts and Behaviors Among First-Year College Students: Results From the WMH-ICS Project. *Journal of the American Academy of Child and Adolescent Psychiatry*. 2018;57(4):263-73.e1.

11. Peltzer K, Yi S, Pengpid S. Suicidal behaviors and associated factors among university students in six countries in the Association of Southeast Asian Nations (ASEAN). *Asian J Psychiatr*. 2017;26:32-8.
12. Conley CS, Kirsch AC, Dickson DA, Bryant FB. Negotiating the transition to college: Developmental trajectories and gender differences in psychological functioning, cognitive-affective strategies, and social well-being. *Emerging Adulthood*. 2014;2(3):195-210.
13. Syed M. Emerging adulthood: Developmental stage, theory, or nonsense. In: Arnett JJ, editor. *The Oxford handbook of emerging adulthood*. New York: Oxford University Press; 2016. p. 11-25.
14. Dorney P. The Empty Desk: The Sudden Death of a Nursing Classmate. *OMEGA-Journal of Death and Dying*. 2016;74(2):164-92.
15. Ata AW. Mental health of bereaved Muslims in Australia: religious, gender, after death communication (adc) and grief issues. *Journal of Religious Education*. 2016;64(1):47-58.
16. Cerel J, McIntosh JL, Neimeyer RA, Maple M, Marshall D. The continuum of "survivorship": Definitional issues in the aftermath of suicide. *Suicide and Life-Threatening Behavior*. 2014;44(6):591-600.
17. Kheibari A, Cerel J, Sanford R. Attitudes About Suicide Ideation Among Suicide Loss Survivors: A Vignette Study. *Psychological Reports*. 2019;122(5):1707-19.
18. Sanford R, Kheibari A, Cerel J. Attitudes About Suicide Ideation Among Suicide Loss Survivors: A Vignette Study. *Psychological Reports*. 2019;122(5):1707-19.
19. Berman AL. Estimating the population of survivors of suicide: seeking an evidence base. *Suicide & life-threatening behavior*. 2011;41(1):110.
20. Bartik W, Maple M, McKay K. Suicide bereavement and stigma for young people in rural Australia: a mixed methods study. *Advances in Mental Health*. 2015;13(1):84-95.
21. Kaur R, Stedmon J. A phenomenological enquiry into the impact of bereavement by suicide over the life course. *Mortality*. 2022;27(1):53-74.
22. Leenaars LS, Leenaars AA. Suicide postvention programs in colleges and universities. In: Lamis DA, Lester D, editors. *Understanding and preventing*

- college student suicide. Springfield, IL: Charles C Thomas Publisher; 2011. p. 273-90.
23. Streufert BJ. Death on campuses: Common Postvention Strategies in Higher Education. *Death studies*. 2004;28(2):151-72.
  24. Kölves K, Ross V, Hawgood J, Spence SH, De Leo D. The impact of a student's suicide: Teachers' perspectives. *Journal of affective disorders*. 2017;207:276-81.
  25. Kim JE. Korean teachers' bereavement experience following student suicide. *Crisis*. 2019.
  26. Arksey AM, Greidanus EJ. "I Could Hardly Breathe": Teachers' Lived Experiences of Bereavement After the Violent Death of a Student. *Canadian Journal of Counselling & Psychotherapy/Revue Canadienne de Counseling et de Psychothérapie*. 2022;56(1).
  27. Azorina V, Morant N, Nesse H, Stevenson F, Osborn D, King M, et al. The perceived impact of suicide bereavement on specific interpersonal relationships: A qualitative study of survey data. *International journal of environmental research and public health*. 2019;16(10):1801.
  28. Andriessen K. Can postvention be prevention? *Crisis*. 2009;30(1):43-7.
  29. Levine H. Suicide and its impact on campus. *New directions for student services*. 2008;2008(121):63-76.
  30. Trimble T, Hannigan B, Gaffney M. Suicide postvention; coping, support and transformation. *The Irish Journal of Psychology*. 2012;33(2-3):115-21.
  31. Szumilas M, Kutcher S. Post-suicide intervention programs: a systematic review. *Canadian Journal of Public Health*. 2011;102(1):18-9.
  32. Tøllefsen IM, Thiblin I, Helweg-Larsen K, Hem E, Kastrup M, Nyberg U, et al. Accidents and undetermined deaths: re-evaluation of nationwide samples from the Scandinavian countries. *BMC public health*. 2016;16:449.
  33. van der Feltz-Cornelis CM, Sarchiapone M, Postuvan V, Volker D, Roskar S, Grum AT, et al. Best Practice Elements of Multilevel Suicide Prevention Strategies A Review of Systematic Reviews. *Crisis-The Journal of Crisis Intervention and Suicide Prevention*. 2011;32(6):319-33.
  34. Andriessen K, Krysinska K, Hill N, Reifels L, Robinson J, Reavley N, et al. Effectiveness of interventions for people bereaved through suicide: a

- 1  
2  
3 systematic review of controlled studies of grief, psychosocial and suicide-  
4 related outcomes. *BMC psychiatry*. 2019;19(1):1-15.  
5  
6 35. Andriessen K, Kryszynska K, Kölves K, Reavley N. Suicide Postvention Service  
7 Models and Guidelines 2014–2019: A Systematic Review. *Frontiers in*  
8 *Psychology*. 2019;10(2677).  
9  
10 36. Linde K, Tremblay J, Steinig J, Nagl M, Kersting A. Grief interventions for people  
11 bereaved by suicide: A systematic review. *PLoS One*. 2017;12(6):e0179496.  
12  
13 37. McDaid C, Trowman R, Golder S, Hawton K, Sowden A. Interventions for  
14 people bereaved through suicide: systematic review. *The British Journal of*  
15 *Psychiatry*. 2008;193(6):438-43.  
16  
17 38. Bruffaerts R, Mortier P, Auerbach RP, Alonso J, Hermsdörfer De la Torre AE,  
18 Cuijpers P, et al. Lifetime and 12-month treatment for mental disorders and  
19 suicidal thoughts and behaviors among first year college students.  
20 *International Journal of Methods in Psychiatric Research*. 2019;28(2):1-15.  
21  
22 39. Peters MD, Godfrey C, McInerney P, Munn Z, Tricco AC, Khalil H. Chapter  
23 11: scoping reviews (2020 version). *JBIM manual for evidence synthesis*, JBI.  
24 2020.  
25  
26 40. Analytics C. Endnote version 20.2. San Francisco: Clarivate Analytics; 2021.  
27  
28 41. Ouzzani M, Hammady H, Fedorowicz Z, Elmagarmid A. Rayyan—a web and  
29 mobile app for systematic reviews. *Systematic reviews*. 2016;5(1):1-10.  
30  
31 42. Page MJ, McKenzie JE, Bossuyt PM, Boutron I, Hoffmann TC, Mulrow CD, et  
32 al. The PRISMA 2020 statement: an updated guideline for reporting  
33 systematic reviews. *Systematic reviews*. 2021;10(1):1-11.  
34  
35 43. Arksey H, O'Malley L. Scoping studies: towards a methodological framework.  
36 *International journal of social research methodology*. 2005;8(1):19-32.  
37  
38 44. World Bank. World Bank Country and Lending Groups 2023 [Available from:  
39 [https://datahelpdesk.worldbank.org/knowledgebase/articles/906519-world-](https://datahelpdesk.worldbank.org/knowledgebase/articles/906519-world-bank-country-and-lending-groups)  
40 [bank-country-and-lending-groups](https://datahelpdesk.worldbank.org/knowledgebase/articles/906519-world-bank-country-and-lending-groups).  
41  
42 45. Aromataris E, Munn Z. *JBIM manual for evidence synthesis*: Joanna Briggs  
43 Institute; 2020.  
44  
45 46. Levac D, Colquhoun H, O'Brien KK. Scoping studies: advancing the  
46 methodology. *Implementation science*. 2010;5(1):1-9.  
47  
48  
49  
50  
51  
52  
53  
54  
55  
56  
57  
58  
59  
60

- 1  
2  
3 47. Allen BG, Calhoun LG, Cann A, Tedeschi RG. The effect of cause of death on  
4 responses to the bereaved: Suicide compared to accident and natural causes.  
5 Omega: Journal of Death and Dying. 1993;28(1):39-48.  
6  
7
- 8 48. Balk DE, Walker AC, Baker A. Prevalence and severity of college student  
9 bereavement examined in a randomly selected sample. Death Studies.  
10 2010;34(5):459-68.  
11
- 12 49. McIntosh JL, Kelly LD. Survivors' reactions: Suicide vs other causes. Crisis:  
13 The Journal of Crisis Intervention and Suicide Prevention. 1992;13(2):82-93.  
14
- 15 50. Rompalo S, Parks R, Taylor A. Suicide Postvention: A Growing Challenge for  
16 Higher Education Administrators. College and University. 2021;96(1):63-70.  
17
- 18 51. Silverman E, Range L, Overholser JC. Bereavement from suicide as  
19 compared to other forms of bereavement. Omega: Journal of Death and  
20 Dying. 1994;30(1):41-51.  
21
- 22 52. Thompson KE, Range LM. Recent bereavement from suicide and other  
23 deaths: Can people imagine it as it really is? Omega: Journal of Death and  
24 Dying. 1990;22(4):249-59.  
25
- 26 53. Thompson KE, Range LM. Bereavement following suicide and other deaths -  
27 Why support attempts fail. OMEGA-Journal of Death and Dying.  
28 1993;26(1):61-70.  
29
- 30 54. Causer H, Bradley E, Muse K, Smith J. Bearing witness: A grounded theory of  
31 the experiences of staff at two United Kingdom Higher Education Institutions  
32 following a student death by suicide. PloS one. 2021;16(5):e0251369.  
33
- 34 55. Pitman AL, Osborn DP, Rantell K, King MB. The stigma perceived by people  
35 bereaved by suicide and other sudden deaths: A cross-sectional UK study of  
36 3432 bereaved adults. Journal of psychosomatic research. 2016;87:22-9.  
37
- 38 56. Pitman A, Nesse H, Morant N, Azorina V, Stevenson F, King M, et al.  
39 Attitudes to suicide following the suicide of a friend or relative: a qualitative  
40 study of the views of 429 young bereaved adults in the UK. BMC psychiatry.  
41 2017;17(1):400.  
42
- 43 57. Pitman AL, Rantell K, Moran P, Sireling L, Marston L, King M, et al. Support  
44 received after bereavement by suicide and other sudden deaths: a cross-  
45 sectional UK study of 3432 young bereaved adults. BMJ Open.  
46 2017;7(5):e014487.  
47  
48  
49  
50  
51  
52  
53  
54  
55  
56  
57  
58  
59  
60

- 1  
2  
3 58. Pitman A, Putri AK, De Souza T, Stevenson F, King M, Osborn D, et al. The  
4 Impact of Suicide Bereavement on Educational and Occupational Functioning:  
5 A Qualitative Study of 460 Bereaved Adults. *International Journal of*  
6 *Environmental Research and Public Health*. 2018;15(4).  
7  
8  
9
- 10 59. Pitman AL, Stevenson F, Osborn DPJ, King MB. The stigma associated with  
11 bereavement by suicide and other sudden deaths: A qualitative interview  
12 study. *Soc Sci Med*. 2018;198:121-9.  
13  
14
- 15 60. Pitman A, De Souza T, Putri AK, Stevenson F, King M, Osborn D, et al.  
16 Support Needs and Experiences of People Bereaved by Suicide: Qualitative  
17 Findings from a Cross-Sectional British Study of Bereaved Young Adults.  
18 *International Journal of Environmental Research and Public Health*.  
19 2018;15(4).  
20  
21  
22  
23
- 24 61. Bailley SE, Kral MJ. Survivors of suicide do grieve differently: Empirical  
25 support for a common sense proposition. *Suicide & Life-Threatening*  
26 *Behavior*. 1999;29(3):256.  
27  
28
- 29 62. Bhaskaran J, Afifi TO, Sareen J, Vincent N, Bolton JM. A cross-sectional  
30 examination of sudden-death bereavement in university students. *Journal of*  
31 *American College Health*. 2021:1-9.  
32  
33
- 34 63. Thornton G, Whittemore KD, Robertson DU. Evaluation of people bereaved  
35 by suicide. *Death Studies*. 1989;13(2):119-26.  
36  
37
- 38 64. Parkes C, Weiss R. *Recovery from bereavement* Basic Books. New York.  
39 1983.  
40
- 41 65. Wieneke KC, Schaepe KS, Egginton JS, Jenkins SM, Block NC, Riley BA, et  
42 al. The supervisor's perceived role in employee well-being: Results from Mayo  
43 Clinic. *American Journal of Health Promotion*. 2019;33(2):300-11.  
44  
45
- 46 66. Mueller AS, Abrutyn S. Suicidal disclosures among friends: Using social  
47 network data to understand suicide contagion. *Journal of health and social*  
48 *behavior*. 2015;56(1):131-48.  
49  
50
- 51 67. Miklin S, Mueller AS, Abrutyn S, Ordonez K. What does it mean to be  
52 exposed to suicide?: Suicide exposure, suicide risk, and the importance of  
53 meaning-making. *Soc Sci Med*. 2019;233:21-7.  
54  
55
- 56 68. Higgins A, Hybholt L, Meuser OA, Eustace Cook J, Downes C, Morrissey J.  
57 Scoping Review of Peer-Led Support for People Bereaved by Suicide.  
58 *International journal of environmental research and public health*. 2022;19(6).  
59  
60

69. Schlichthorst M, Ozols I, Reifels L, Morgan A. Lived experience peer support programs for suicide prevention: a systematic scoping review. *International Journal of Mental Health Systems*. 2020;14(1):1-12.
70. Cole AB, Leavens EL, Brett EI, Lopez SV, Pipestem KR, Tucker RP, et al. Alcohol use and the interpersonal theory of suicide in American Indian young adults. *Journal of Ethnicity in Substance Abuse*. 2020;19(4):537-52.
71. Perry A, Pyle D, Lamont-Mills A, du Plessis C, du Preez J. Suicidal behaviours and moderator support in online health communities: a scoping review. *BMJ open*. 2021;11(6):e047905.
72. Mirick RG, Wladkowski SP. Skype in qualitative interviews: Participant and researcher perspectives. *The Qualitative Report*. 2019;24(12):3061-72.
73. Andriessen K, Castelli Dransart DA, Cerel J, Maple M. Current Postvention Research and Priorities for the Future. *Crisis*. 2017;38(3):202-6.
74. Andriessen K, Mowll J, Lobb E, Draper B, Dudley M, Mitchell PB. "Don't bother about me." The grief and mental health of bereaved adolescents. *Death studies*. 2018;42(10):607-15.
75. Maple M, Cerel J, Jordan JR, McKay K. Uncovering and Identifying the Missing Voices in Suicide Bereavement. *Suicidology Online*. 2014;5(1).
76. Maple M, Pearce T, Sanford R, Cerel J, Castelli Dransart DA, Andriessen K. A Systematic Mapping of Suicide Bereavement and Postvention Research and a Proposed Strategic Research Agenda. *Crisis*. 2018;39(4):275-82.

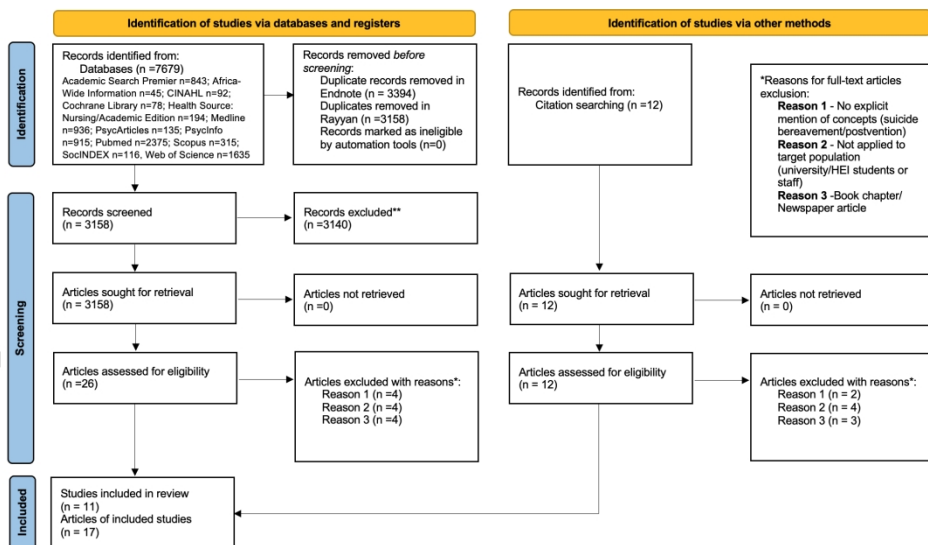

Figure 1. PRISMA Diagram

401x242mm (144 x 144 DPI)



Supplementary Table 1. Articles included in the review

| Authors<br>(year)<br>Location       | Design and methods             | Participants                                                                           | Instrument/Measures                                                 | Key Findings                                                                                                                                                                                                                                                                                                           |
|-------------------------------------|--------------------------------|----------------------------------------------------------------------------------------|---------------------------------------------------------------------|------------------------------------------------------------------------------------------------------------------------------------------------------------------------------------------------------------------------------------------------------------------------------------------------------------------------|
| <b>QUALITATIVE STUDIES</b>          |                                |                                                                                        |                                                                     |                                                                                                                                                                                                                                                                                                                        |
| Causer et al (2021)<br>(43)<br>UK   | Qualitative<br>Grounded theory | <i>N</i> = 19 Staff at HEI's:<br><i>n</i> = 8 Male (42%)<br><i>n</i> = 11 Female (58%) | Survey and Interviews<br>developed and conducted<br>by the authors. | Staff described how in<br>"bearing witness" to student<br>suicide that all subsequent<br>experiences were shaped.<br>This included practical tasks<br>immediately following the<br>death by suicide, physical,<br>emotional and<br>psychological changes and<br>experiences of support.                                |
| Rompalo et al<br>(2021) (44)<br>USA | Qualitative<br>Phenomenology   | <i>N</i> = 8 student affairs<br>administrators<br><br>Gender not stated                | Online interviews                                                   | HEI administrators identified<br>three main challenges i)<br>lack of postvention training<br>ii) managing notifications<br>about the student death<br>before it gets announced on<br>social media iii) balancing<br>remembering the student<br>with a memorial while<br>minimising the risk of<br>suicide contagion on |

campus. HEI administrators also stated that there are those that felt that by having memorials one was “glorifying” the deceased student.

**MIXED METHOD STUDIES**

|                            |               |                                                                                                                                                                   |                                                                                                                               |                                                                                                                                                                                                                                                                             |
|----------------------------|---------------|-------------------------------------------------------------------------------------------------------------------------------------------------------------------|-------------------------------------------------------------------------------------------------------------------------------|-----------------------------------------------------------------------------------------------------------------------------------------------------------------------------------------------------------------------------------------------------------------------------|
| Allen et al (1993) (45)    | Mixed methods | <i>n</i> = 30 male (50%) <i>n</i> = 30 female (50%) undergraduate university students. Mean age 21 years. 75% Caucasian, 15% African-American, 9% other ethnicity | State-Trait Anxiety Inventory and interview (46)                                                                              | Those bereaved by suicide are perceived to be different from individuals bereaved by other causes of death. Individuals bereaved by suicide are also viewed as more psychologically disturbed and more able to prevent the deaths compared to accidental or natural deaths. |
| USA                        |               |                                                                                                                                                                   |                                                                                                                               |                                                                                                                                                                                                                                                                             |
| *Pitman et al (2017b) (47) | Mixed methods | <i>N</i> = 429 staff and students at British HEI’s bereaved by suicide:                                                                                           | Online questionnaire developed by the authors with 119 closed quantitative questions and 20 open ended qualitative questions. | Following their experiences of suicide bereavement, the respondents saw suicide as a tangible option, identified their shared vulnerability to                                                                                                                              |

|    |                            |                                                         |                                                                             |                                                                                                                                                                                    |                                                                                                                                                                                                                                                                                                                                                                                                                                                                                  |
|----|----------------------------|---------------------------------------------------------|-----------------------------------------------------------------------------|------------------------------------------------------------------------------------------------------------------------------------------------------------------------------------|----------------------------------------------------------------------------------------------------------------------------------------------------------------------------------------------------------------------------------------------------------------------------------------------------------------------------------------------------------------------------------------------------------------------------------------------------------------------------------|
| 1  |                            |                                                         |                                                                             |                                                                                                                                                                                    |                                                                                                                                                                                                                                                                                                                                                                                                                                                                                  |
| 2  |                            |                                                         |                                                                             |                                                                                                                                                                                    |                                                                                                                                                                                                                                                                                                                                                                                                                                                                                  |
| 3  | UK                         | (Quantitative cross-sectional; Qualitative descriptive) | Male: not stated<br>Female: 82% (number not stated)<br>Mean age: 25.3 years | one out of 20 questions were the focus of this report.                                                                                                                             | suicide and made personal determination to avoid dying by suicide.                                                                                                                                                                                                                                                                                                                                                                                                               |
| 4  |                            |                                                         |                                                                             |                                                                                                                                                                                    |                                                                                                                                                                                                                                                                                                                                                                                                                                                                                  |
| 5  |                            |                                                         |                                                                             |                                                                                                                                                                                    |                                                                                                                                                                                                                                                                                                                                                                                                                                                                                  |
| 6  |                            |                                                         |                                                                             |                                                                                                                                                                                    |                                                                                                                                                                                                                                                                                                                                                                                                                                                                                  |
| 7  |                            |                                                         |                                                                             |                                                                                                                                                                                    |                                                                                                                                                                                                                                                                                                                                                                                                                                                                                  |
| 8  |                            |                                                         |                                                                             |                                                                                                                                                                                    |                                                                                                                                                                                                                                                                                                                                                                                                                                                                                  |
| 9  |                            |                                                         |                                                                             |                                                                                                                                                                                    |                                                                                                                                                                                                                                                                                                                                                                                                                                                                                  |
| 10 |                            |                                                         |                                                                             |                                                                                                                                                                                    |                                                                                                                                                                                                                                                                                                                                                                                                                                                                                  |
| 11 |                            |                                                         |                                                                             |                                                                                                                                                                                    |                                                                                                                                                                                                                                                                                                                                                                                                                                                                                  |
| 12 | *Pitman et al (2018a) (48) | Mixed methods                                           | <i>N</i> = 420 staff and students at British HEI's bereaved by suicide:     | Online questionnaire developed by the authors with 119 closed quantitative questions and 20 open ended qualitative questions. 2 out of 20 questions were the focus of this report. | In the quantitative responses, the majority of the participants (75%) reported receiving informal support from friends. 41% of those who received support also received support from a mental health professional. The participants were also able to describe the experience of the support received, articulate specific support needs such as proactive support, and also outline reasons for not seeking support because they believed they would not find support valuable. |
| 13 |                            | (Quantitative cross-sectional; Qualitative descriptive) | <i>n</i> = 71 Male (17%)                                                    |                                                                                                                                                                                    |                                                                                                                                                                                                                                                                                                                                                                                                                                                                                  |
| 14 | UK                         |                                                         | <i>n</i> = 349 Female (83%)                                                 |                                                                                                                                                                                    |                                                                                                                                                                                                                                                                                                                                                                                                                                                                                  |
| 15 |                            |                                                         |                                                                             |                                                                                                                                                                                    |                                                                                                                                                                                                                                                                                                                                                                                                                                                                                  |
| 16 |                            |                                                         |                                                                             |                                                                                                                                                                                    |                                                                                                                                                                                                                                                                                                                                                                                                                                                                                  |
| 17 |                            |                                                         |                                                                             |                                                                                                                                                                                    |                                                                                                                                                                                                                                                                                                                                                                                                                                                                                  |
| 18 |                            |                                                         |                                                                             |                                                                                                                                                                                    |                                                                                                                                                                                                                                                                                                                                                                                                                                                                                  |
| 19 |                            |                                                         |                                                                             |                                                                                                                                                                                    |                                                                                                                                                                                                                                                                                                                                                                                                                                                                                  |
| 20 |                            |                                                         |                                                                             |                                                                                                                                                                                    |                                                                                                                                                                                                                                                                                                                                                                                                                                                                                  |
| 21 |                            |                                                         |                                                                             |                                                                                                                                                                                    |                                                                                                                                                                                                                                                                                                                                                                                                                                                                                  |
| 22 |                            |                                                         |                                                                             |                                                                                                                                                                                    |                                                                                                                                                                                                                                                                                                                                                                                                                                                                                  |
| 23 |                            |                                                         |                                                                             |                                                                                                                                                                                    |                                                                                                                                                                                                                                                                                                                                                                                                                                                                                  |
| 24 |                            |                                                         |                                                                             |                                                                                                                                                                                    |                                                                                                                                                                                                                                                                                                                                                                                                                                                                                  |
| 25 |                            |                                                         |                                                                             |                                                                                                                                                                                    |                                                                                                                                                                                                                                                                                                                                                                                                                                                                                  |
| 26 |                            |                                                         |                                                                             |                                                                                                                                                                                    |                                                                                                                                                                                                                                                                                                                                                                                                                                                                                  |
| 27 |                            |                                                         |                                                                             |                                                                                                                                                                                    |                                                                                                                                                                                                                                                                                                                                                                                                                                                                                  |
| 28 |                            |                                                         |                                                                             |                                                                                                                                                                                    |                                                                                                                                                                                                                                                                                                                                                                                                                                                                                  |
| 29 |                            |                                                         |                                                                             |                                                                                                                                                                                    |                                                                                                                                                                                                                                                                                                                                                                                                                                                                                  |
| 30 |                            |                                                         |                                                                             |                                                                                                                                                                                    |                                                                                                                                                                                                                                                                                                                                                                                                                                                                                  |
| 31 |                            |                                                         |                                                                             |                                                                                                                                                                                    |                                                                                                                                                                                                                                                                                                                                                                                                                                                                                  |
| 32 |                            |                                                         |                                                                             |                                                                                                                                                                                    |                                                                                                                                                                                                                                                                                                                                                                                                                                                                                  |
| 33 |                            |                                                         |                                                                             |                                                                                                                                                                                    |                                                                                                                                                                                                                                                                                                                                                                                                                                                                                  |
| 34 | *Pitman et al (2018b) (49) | Mixed methods                                           | <i>N</i> = 460 staff and students at British HEI's bereaved by suicide:     | Online questionnaire developed by the authors with 119 closed quantitative questions and 20 open ended qualitative questions.                                                      | The respondents bereaved by suicide noted specific aspects of grief which impacted their work performance, particularly sadness, poor                                                                                                                                                                                                                                                                                                                                            |
| 35 |                            | (Quantitative cross-sectional; Qualitative descriptive) | <i>n</i> = 76 Male (17%)                                                    |                                                                                                                                                                                    |                                                                                                                                                                                                                                                                                                                                                                                                                                                                                  |
| 36 | UK                         |                                                         |                                                                             |                                                                                                                                                                                    |                                                                                                                                                                                                                                                                                                                                                                                                                                                                                  |
| 37 |                            |                                                         |                                                                             |                                                                                                                                                                                    |                                                                                                                                                                                                                                                                                                                                                                                                                                                                                  |
| 38 |                            |                                                         |                                                                             |                                                                                                                                                                                    |                                                                                                                                                                                                                                                                                                                                                                                                                                                                                  |
| 39 |                            |                                                         |                                                                             |                                                                                                                                                                                    |                                                                                                                                                                                                                                                                                                                                                                                                                                                                                  |
| 40 |                            |                                                         |                                                                             |                                                                                                                                                                                    |                                                                                                                                                                                                                                                                                                                                                                                                                                                                                  |
| 41 |                            |                                                         |                                                                             |                                                                                                                                                                                    |                                                                                                                                                                                                                                                                                                                                                                                                                                                                                  |
| 42 |                            |                                                         |                                                                             |                                                                                                                                                                                    |                                                                                                                                                                                                                                                                                                                                                                                                                                                                                  |
| 43 |                            |                                                         |                                                                             |                                                                                                                                                                                    |                                                                                                                                                                                                                                                                                                                                                                                                                                                                                  |
| 44 |                            |                                                         |                                                                             |                                                                                                                                                                                    |                                                                                                                                                                                                                                                                                                                                                                                                                                                                                  |
| 45 |                            |                                                         |                                                                             |                                                                                                                                                                                    |                                                                                                                                                                                                                                                                                                                                                                                                                                                                                  |
| 46 |                            |                                                         |                                                                             |                                                                                                                                                                                    |                                                                                                                                                                                                                                                                                                                                                                                                                                                                                  |

1  
2  
3  
4  
5  
6  
7  
8  
9  
10  
11  
12  
13  
14  
15  
16  
17  
18  
19  
20  
21  
22  
23  
24  
25  
26  
27  
28  
29  
30  
31  
32  
33  
34  
35  
36  
37  
38  
39  
40  
41  
42  
43  
44  
45  
46

*n* = 384 Female (83%)

2 out of 20 questions were the focus of this report.

concentration, confusion and anxiety. Respondents also cited structural challenges in work and educational settings, such as lack of support.

\*Pitman et al (2018c) (50)

Mixed methods (Quantitative cross-sectional; Qualitative descriptive)

*n* = 27 staff and students at British HEI's bereaved by suicide:  
*n* = 76 Male (17%)  
*n* = 384 Female (83%)

Following cross-sectional survey participants invited for face to face interview

Most of the respondents bereaved by suicide who were non-British perceived that others blamed them or their relatives and friends as being responsible for the decedent's suicide. They further described that they experienced a lack of support from both friends and professionals and this was experienced as stigmatising.

UK

**QUANTITATIVE STUDIES**

Bailey et al (1999) (51)

Quantitative Descriptive

*N* = 350 university students  
*n* = 259 bereaved by natural causes  
*n* = 57 bereaved by accident

Grief Experience Questionnaire (52)  
Impact of Event Scale  
Texas Revised Inventory of Grief (53)  
Questionnaire developed by the authors

Individuals bereaved by suicide reported feeling responsible for the person's death compared to the other bereaved groups (accident and natural causes).

Canada

|    |                   |                 |                                   |                           |                            |
|----|-------------------|-----------------|-----------------------------------|---------------------------|----------------------------|
| 1  |                   |                 | <i>n</i> = 34 bereaved by suicide |                           |                            |
| 2  |                   |                 |                                   |                           |                            |
| 3  |                   |                 | <i>n</i> = 90 Male (26.2%)        |                           |                            |
| 4  |                   |                 |                                   |                           |                            |
| 5  |                   |                 | <i>n</i> = 253 Female (73.8)      |                           |                            |
| 6  |                   |                 |                                   |                           |                            |
| 7  |                   |                 | <i>n</i> = 7 Other                |                           |                            |
| 8  |                   |                 |                                   |                           |                            |
| 9  |                   |                 | Mean age: 20.75 years             |                           |                            |
| 10 |                   |                 |                                   |                           |                            |
| 11 |                   |                 | 87.9% Caucasian                   |                           |                            |
| 12 |                   |                 |                                   |                           |                            |
| 13 |                   |                 |                                   |                           |                            |
| 14 |                   |                 |                                   |                           |                            |
| 15 |                   |                 |                                   |                           |                            |
| 16 |                   |                 |                                   |                           |                            |
| 17 |                   |                 |                                   |                           |                            |
| 18 | Balk et al (2010) | Quantitative    | <i>N</i> = 118 undergraduate      | Prigerson et al. (2008)   | In this sample of          |
| 19 | (54)              |                 | university students:              | revised and shortened the | undergraduate students,    |
| 20 |                   | Cross-sectional |                                   | Inventory for Traumatic   | four of the decedents died |
| 21 | USA               |                 | <i>n</i> = 31 bereaved by natural | Grief into a 13-item      | by suicide.                |
| 22 |                   |                 | causes                            | questionnaire that can be |                            |
| 23 |                   |                 |                                   | used to measure           |                            |
| 24 |                   |                 | <i>n</i> = 8 bereaved by accident | complicated grief and     |                            |
| 25 |                   |                 |                                   | diagnose prolonged grief  |                            |
| 26 |                   |                 | <i>n</i> = 6 bereaved by murder   | disorder (55).            |                            |
| 27 |                   |                 |                                   |                           |                            |
| 28 |                   |                 | <i>n</i> = 4 bereaved by suicide  | Demographic and           |                            |
| 29 |                   |                 |                                   | background questionnaire  |                            |
| 30 |                   |                 | Male: 41% (number not stated)     | developed by the authors  |                            |
| 31 |                   |                 |                                   |                           |                            |
| 32 |                   |                 |                                   |                           |                            |
| 33 |                   |                 | Female: 59% (number not           |                           |                            |
| 34 |                   |                 | stated)                           |                           |                            |
| 35 |                   |                 |                                   |                           |                            |
| 36 |                   |                 | 94% Protestants (number not       |                           |                            |
| 37 |                   |                 | stated)                           |                           |                            |
| 38 |                   |                 |                                   |                           |                            |
| 39 |                   |                 |                                   |                           |                            |
| 40 |                   |                 |                                   |                           |                            |
| 41 |                   |                 |                                   |                           |                            |
| 42 |                   |                 |                                   |                           |                            |
| 43 |                   |                 |                                   |                           |                            |
| 44 |                   |                 |                                   |                           |                            |
| 45 |                   |                 |                                   |                           |                            |
| 46 |                   |                 |                                   |                           |                            |

1  
2  
3  
4  
5  
6  
7  
8  
9  
10  
11  
12  
13  
14  
15  
16  
17  
18  
19  
20  
21  
22  
23  
24  
25  
26  
27  
28  
29  
30  
31  
32  
33  
34  
35  
36  
37  
38  
39  
40  
41  
42  
43  
44  
45  
46

|                                     |                                 |                                                                                                                                                                                                                                                                                                                                                                                                               |                                                                                                                                                                                                                                                                                                  |                                                                                                                                                                                                                                                                                                                                  |
|-------------------------------------|---------------------------------|---------------------------------------------------------------------------------------------------------------------------------------------------------------------------------------------------------------------------------------------------------------------------------------------------------------------------------------------------------------------------------------------------------------|--------------------------------------------------------------------------------------------------------------------------------------------------------------------------------------------------------------------------------------------------------------------------------------------------|----------------------------------------------------------------------------------------------------------------------------------------------------------------------------------------------------------------------------------------------------------------------------------------------------------------------------------|
| Bhaskaran et al (2021) (56)         | Quantitative<br>Cross-sectional | <p>69% Caucasian (number not stated)<br/> <i>N</i> = 964 bereaved university students:</p> <p><i>n</i> = 322 Male (33.4%)<br/> <i>n</i> = 632 Female (65.6%)</p> <p><i>n</i> = 134 bereaved through accidents:<br/> <i>n</i> = 20 bereaved through homicide<br/> <i>n</i> = 75 bereaved through suicide</p> <p><i>n</i> = 648 bereaved through illness<br/> <i>n</i> = 87 bereaved through unknown causes</p> | <p>Patient Health Questionnaire (PHQ-9) (57)</p> <p>Generalized Anxiety Disorder Assessment-7 (GAD-7) (58)</p> <p>Inventory of Complicated Grief (ICG) (59)</p> <p>National Stressful Events PTSD Short Scale (NSESS) (60)</p> <p>The alcohol use disorders identification test (AUDIT) (61)</p> | <p>75 out of 964 deaths were due to suicide. Suicide is categorised under sudden death bereavement. Sudden death bereavement was associated with increased likelihood of complicated grief symptomatology and increased likelihood of generalised anxiety disorder.</p>                                                          |
| McIntosh & Kelly (1992) (62)<br>USA | Quantitative<br>Cross-sectional | <p><i>N</i> = 174 university students:</p> <p><i>n</i> = 63 bereaved by natural causes<br/> <i>n</i> = 71 bereaved by accidents<br/> <i>n</i> = 40 bereaved by suicide</p> <p>Mean age: 27.9 years</p>                                                                                                                                                                                                        | <p>Demographic questionnaire developed by authors</p> <p>Suicidal Behaviors Questionnaire (63)</p> <p>Impact of Event Scale (64)</p> <p>Revised UCLA Loneliness Scale (65)</p>                                                                                                                   | <p>Those bereaved by suicide and accidents felt a greater need to understand the death. 87 percent of those bereaved by suicide also indicated that they felt stigmatised by others. There was no difference to the guilt felt by those bereaved by suicide when compared to those bereaved by natural causes and accidents.</p> |

|    |                      |                 |                                                                                                     |                                                                                                                             |                                                                                                                                                                                                                                                                                                                                             |
|----|----------------------|-----------------|-----------------------------------------------------------------------------------------------------|-----------------------------------------------------------------------------------------------------------------------------|---------------------------------------------------------------------------------------------------------------------------------------------------------------------------------------------------------------------------------------------------------------------------------------------------------------------------------------------|
|    |                      |                 | <i>n</i> = 55 Male (32%)                                                                            | Texas Revised Inventory of Grief (TRIG) (53)                                                                                |                                                                                                                                                                                                                                                                                                                                             |
|    |                      |                 | <i>n</i> = 119 Female (68%)                                                                         |                                                                                                                             |                                                                                                                                                                                                                                                                                                                                             |
| 1  |                      |                 |                                                                                                     |                                                                                                                             |                                                                                                                                                                                                                                                                                                                                             |
| 2  |                      |                 |                                                                                                     |                                                                                                                             |                                                                                                                                                                                                                                                                                                                                             |
| 3  |                      |                 |                                                                                                     |                                                                                                                             |                                                                                                                                                                                                                                                                                                                                             |
| 4  |                      |                 |                                                                                                     |                                                                                                                             |                                                                                                                                                                                                                                                                                                                                             |
| 5  |                      |                 |                                                                                                     |                                                                                                                             |                                                                                                                                                                                                                                                                                                                                             |
| 6  |                      |                 |                                                                                                     |                                                                                                                             |                                                                                                                                                                                                                                                                                                                                             |
| 7  |                      |                 |                                                                                                     |                                                                                                                             |                                                                                                                                                                                                                                                                                                                                             |
| 8  |                      |                 |                                                                                                     |                                                                                                                             |                                                                                                                                                                                                                                                                                                                                             |
| 9  | *Pitman et al (2016) | Quantitative    | <i>N</i> = 3432 HEI staff and students who had experienced a sudden bereavement of a close contact. | Online questionnaire developed by the authors.                                                                              | The group of those bereaved by suicide had higher shame, stigma, guilt and responsibility scores when compared to those bereaved by other means.                                                                                                                                                                                            |
| 10 | (66)                 |                 |                                                                                                     |                                                                                                                             |                                                                                                                                                                                                                                                                                                                                             |
| 11 |                      | Cross-sectional |                                                                                                     |                                                                                                                             |                                                                                                                                                                                                                                                                                                                                             |
| 12 | UK                   |                 | <i>n</i> = 2106 bereaved by natural causes                                                          | 10-item stigmatization subscale of the Grief Experience Questionnaire (GEQ) (67).                                           |                                                                                                                                                                                                                                                                                                                                             |
| 13 |                      |                 | <i>n</i> = 712 bereaved by sudden unnatural causes                                                  |                                                                                                                             |                                                                                                                                                                                                                                                                                                                                             |
| 14 |                      |                 | <i>n</i> = 614 bereaved by suicide                                                                  | Secondary measures three related GEQ subscales: shame, responsibility and guilt (52)                                        |                                                                                                                                                                                                                                                                                                                                             |
| 15 |                      |                 | <i>n</i> = 648 Males (19%)                                                                          |                                                                                                                             |                                                                                                                                                                                                                                                                                                                                             |
| 16 |                      |                 | <i>n</i> = 2784 Females (81%)                                                                       |                                                                                                                             |                                                                                                                                                                                                                                                                                                                                             |
| 17 |                      |                 |                                                                                                     |                                                                                                                             |                                                                                                                                                                                                                                                                                                                                             |
| 18 |                      |                 |                                                                                                     |                                                                                                                             |                                                                                                                                                                                                                                                                                                                                             |
| 19 |                      |                 |                                                                                                     |                                                                                                                             |                                                                                                                                                                                                                                                                                                                                             |
| 20 |                      |                 |                                                                                                     |                                                                                                                             |                                                                                                                                                                                                                                                                                                                                             |
| 21 |                      |                 |                                                                                                     |                                                                                                                             |                                                                                                                                                                                                                                                                                                                                             |
| 22 |                      |                 |                                                                                                     |                                                                                                                             |                                                                                                                                                                                                                                                                                                                                             |
| 23 |                      |                 |                                                                                                     |                                                                                                                             |                                                                                                                                                                                                                                                                                                                                             |
| 24 |                      |                 |                                                                                                     |                                                                                                                             |                                                                                                                                                                                                                                                                                                                                             |
| 25 |                      |                 |                                                                                                     |                                                                                                                             |                                                                                                                                                                                                                                                                                                                                             |
| 26 |                      |                 |                                                                                                     |                                                                                                                             |                                                                                                                                                                                                                                                                                                                                             |
| 27 | *Pitman et al        | Quantitative    | <i>N</i> = 3432 HEI staff and students who had experienced a sudden bereavement of a close contact. | Online questionnaire developed by the authors to elicit quantitative data on sociodemographic and clinical characteristics. | Individuals bereaved by suicide were significantly less likely to receive informal support compared to those bereaved by natural causes and likely to report delayed receipt of support. In this sample 25 percent (one in four) people bereaved by suicide had received no formal or informal support. 6 percent of the sample bereaved by |
| 28 | (2017a) (68)         |                 |                                                                                                     |                                                                                                                             |                                                                                                                                                                                                                                                                                                                                             |
| 29 |                      | Cross-sectional |                                                                                                     |                                                                                                                             |                                                                                                                                                                                                                                                                                                                                             |
| 30 | UK                   |                 | <i>n</i> = 2106 bereaved by natural causes                                                          | Composite International Diagnostic Interview screen for lifetime depression (69)                                            |                                                                                                                                                                                                                                                                                                                                             |
| 31 |                      |                 | <i>n</i> = 712 bereaved by sudden unnatural causes                                                  |                                                                                                                             |                                                                                                                                                                                                                                                                                                                                             |
| 32 |                      |                 | <i>n</i> = 614 bereaved by suicide                                                                  | Stigma subscale of the Grief Experience Questionnaire (70)                                                                  |                                                                                                                                                                                                                                                                                                                                             |
| 33 |                      |                 | <i>n</i> = 648 Males (19%)                                                                          |                                                                                                                             |                                                                                                                                                                                                                                                                                                                                             |
| 34 |                      |                 |                                                                                                     |                                                                                                                             |                                                                                                                                                                                                                                                                                                                                             |
| 35 |                      |                 |                                                                                                     |                                                                                                                             |                                                                                                                                                                                                                                                                                                                                             |
| 36 |                      |                 |                                                                                                     |                                                                                                                             |                                                                                                                                                                                                                                                                                                                                             |
| 37 |                      |                 |                                                                                                     |                                                                                                                             |                                                                                                                                                                                                                                                                                                                                             |
| 38 |                      |                 |                                                                                                     |                                                                                                                             |                                                                                                                                                                                                                                                                                                                                             |
| 39 |                      |                 |                                                                                                     |                                                                                                                             |                                                                                                                                                                                                                                                                                                                                             |
| 40 |                      |                 |                                                                                                     |                                                                                                                             |                                                                                                                                                                                                                                                                                                                                             |
| 41 |                      |                 |                                                                                                     |                                                                                                                             |                                                                                                                                                                                                                                                                                                                                             |
| 42 |                      |                 |                                                                                                     |                                                                                                                             |                                                                                                                                                                                                                                                                                                                                             |
| 43 |                      |                 |                                                                                                     |                                                                                                                             |                                                                                                                                                                                                                                                                                                                                             |
| 44 |                      |                 |                                                                                                     |                                                                                                                             |                                                                                                                                                                                                                                                                                                                                             |
| 45 |                      |                 |                                                                                                     |                                                                                                                             |                                                                                                                                                                                                                                                                                                                                             |
| 46 |                      |                 |                                                                                                     |                                                                                                                             |                                                                                                                                                                                                                                                                                                                                             |

1  
2  
3  
4  
5  
6  
7  
8  
9  
10  
11  
12  
13  
14  
15  
16  
17  
18  
19  
20  
21  
22  
23  
24  
25  
26  
27  
28  
29  
30  
31  
32  
33  
34  
35  
36  
37  
38  
39  
40  
41  
42  
43  
44  
45  
46

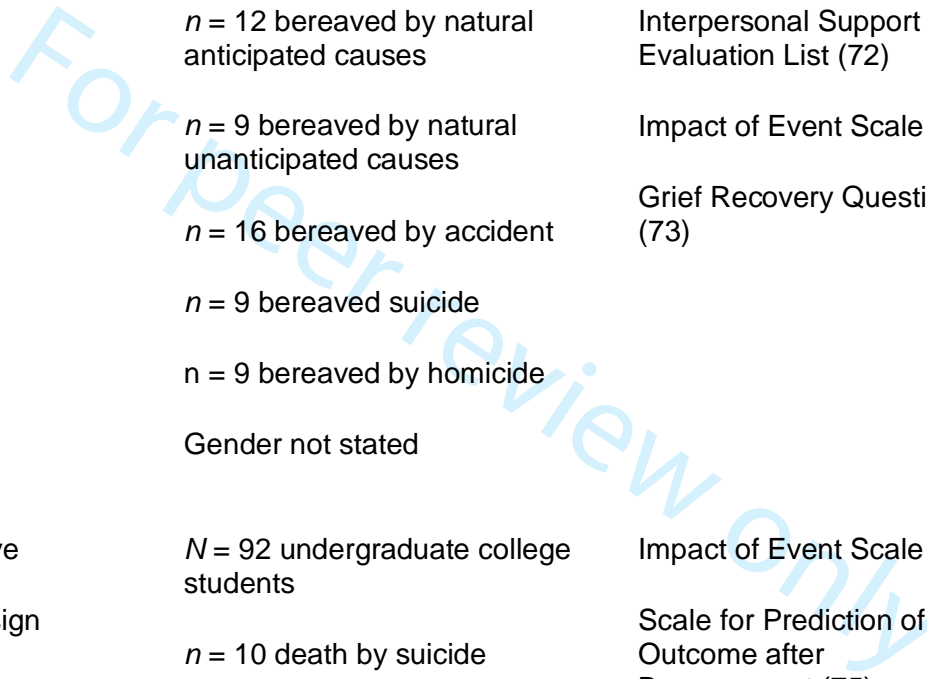

|                              |                 |  |                                                             |                                                        |                                                                                                                                                                                                                            |
|------------------------------|-----------------|--|-------------------------------------------------------------|--------------------------------------------------------|----------------------------------------------------------------------------------------------------------------------------------------------------------------------------------------------------------------------------|
|                              |                 |  | <i>n</i> = 2784 Females (81%)                               |                                                        | suicide reported attempting suicide since the bereavement.                                                                                                                                                                 |
| Silverman et al (1994) (71)  | Quantitative    |  | <i>N</i> = 55 college students bereaved in the last 5 years | Grief Experience Questionnaires (52)                   | Those bereaved by suicide reported higher levels of general grief, loss of social support, stigma and feeling responsible for the death. They also experienced a greater need for an explanation about the cause of death. |
| USA                          | Cross-sectional |  | <i>n</i> = 12 bereaved by natural anticipated causes        | Interpersonal Support Evaluation List (72)             |                                                                                                                                                                                                                            |
|                              |                 |  | <i>n</i> = 9 bereaved by natural unanticipated causes       | Impact of Event Scale (64)                             |                                                                                                                                                                                                                            |
|                              |                 |  | <i>n</i> = 16 bereaved by accident                          | Grief Recovery Questions (73)                          |                                                                                                                                                                                                                            |
|                              |                 |  | <i>n</i> = 9 bereaved suicide                               |                                                        |                                                                                                                                                                                                                            |
|                              |                 |  | <i>n</i> = 9 bereaved by homicide                           |                                                        |                                                                                                                                                                                                                            |
|                              |                 |  | Gender not stated                                           |                                                        |                                                                                                                                                                                                                            |
| Thompson & Range (1990) (74) | Quantitative    |  | <i>N</i> = 92 undergraduate college students                | Impact of Event Scale (64)                             | Non-bereaved participants imagined those bereaved by suicide as receiving more support than actually occurred.                                                                                                             |
| USA                          | Yoked design    |  | <i>n</i> = 10 death by suicide                              | Scale for Prediction of Outcome after Bereavement (75) |                                                                                                                                                                                                                            |
|                              |                 |  | <i>n</i> = 11 death by accident                             |                                                        |                                                                                                                                                                                                                            |
|                              |                 |  | <i>n</i> = 12 Death by anticipated natural causes           | Perceived Social Support Scale (76)                    |                                                                                                                                                                                                                            |



|    |                  |              |                                       |                             |                            |
|----|------------------|--------------|---------------------------------------|-----------------------------|----------------------------|
| 1  |                  |              |                                       |                             |                            |
| 2  |                  |              |                                       |                             |                            |
| 3  |                  |              | <i>n</i> = 13 death by unanticipated  |                             |                            |
| 4  |                  |              | natural causes                        |                             |                            |
| 5  |                  |              |                                       |                             |                            |
| 6  |                  |              | Mean age: 20.25 years.                |                             |                            |
| 7  |                  |              |                                       |                             |                            |
| 8  |                  |              | <i>n</i> = 36 Male (39%)              |                             |                            |
| 9  |                  |              |                                       |                             |                            |
| 10 |                  |              | <i>n</i> = 56 Female (61%)            |                             |                            |
| 11 |                  |              | <i>N</i> = 112 undergraduate college  |                             |                            |
| 12 | Thompson & Range | Quantitative | students                              | Impact of Event Scale (64)  | Individuals bereaved by    |
| 13 | (1993) (77)      |              |                                       |                             | suicide remembered         |
| 14 |                  | Yoked design |                                       | Multiple Affect Adjective   | receiving support that was |
| 15 | USA              |              | <i>n</i> = 18 bereaved by suicide     | Check List-Revised          | unhelpful and filled with  |
| 16 |                  |              |                                       | Perceived Recovery (78)     | blame while the non-       |
| 17 |                  |              | <i>n</i> = 13 bereaved by accident    |                             | bereaved individuals       |
| 18 |                  |              |                                       | Interpersonal Support       | imagined giving more       |
| 19 |                  |              | <i>n</i> = 10 bereaved by anticipated | Evaluation List (72)        | support.                   |
| 20 |                  |              | natural causes                        |                             |                            |
| 21 |                  |              |                                       | Perceived Recovery (75)     |                            |
| 22 |                  |              | <i>n</i> = 10 bereaved by             |                             |                            |
| 23 |                  |              | unanticipated natural causes          | Perceived Social Support    |                            |
| 24 |                  |              |                                       | Scale (76)                  |                            |
| 25 |                  |              | <i>n</i> = 5 bereaved by homicide     |                             |                            |
| 26 |                  |              |                                       | Helpful/Unhelpful Support   |                            |
| 27 |                  |              | Mean age: 20.5 years old              | (79)                        |                            |
| 28 |                  |              |                                       |                             |                            |
| 29 |                  |              | <i>n</i> = 32 Male (29%)              | Theoretically based         |                            |
| 30 |                  |              |                                       | guidelines for scoring      |                            |
| 31 |                  |              | <i>n</i> = 80 Female (71%)            | facilitativeness of support |                            |
| 32 |                  |              |                                       | developed from interviews   |                            |
| 33 |                  |              |                                       | with bereaved persons (80)  |                            |
| 34 |                  |              | An Imagined Group ( <i>n</i> =56      |                             |                            |
| 35 |                  |              | potential comforters) reported        |                             |                            |
| 36 |                  |              | no bereavement within the past        | Scale for Prediction of     |                            |
| 37 |                  |              | two years and no experience of        | Outcome after               |                            |
| 38 |                  |              | comforting a bereaved person in       |                             |                            |
| 39 |                  |              |                                       |                             |                            |
| 40 |                  |              |                                       |                             |                            |
| 41 |                  |              |                                       |                             |                            |
| 42 |                  |              |                                       |                             |                            |
| 43 |                  |              |                                       |                             |                            |
| 44 |                  |              |                                       |                             |                            |
| 45 |                  |              |                                       |                             |                            |
| 46 |                  |              |                                       |                             |                            |

1  
2  
3  
4  
5  
6  
7  
8  
9  
10  
11  
12  
13  
14  
15  
16  
17  
18  
19  
20  
21  
22  
23  
24  
25  
26  
27  
28  
29  
30  
31  
32  
33  
34  
35  
36  
37  
38  
39  
40  
41  
42  
43  
44  
45  
46

the past year. Each person was individually matched on gender and age to a bereaved person.

Bereavement adapted from Parkes (81)

Thornton et al (1989) (82)

Quantitative  
Descriptive

*N* = 89 undergraduate university students

*n* = 28 Male (31%)

*n* = 61 Female (69%)

Personal and social role functioning questions adapted from Hammen and Peters (1979) (83)

When death was caused by suicide males were perceived better as a close friend or club member than females. When a child or adolescent died by suicide, more blame was attributed to the griever.

The participants perceived the deceased was as having been more psychologically unstable when death was by

suicide rather than by illness.

---

\*Note: these six articles are part of a single study by Pitman and colleagues

## Preferred Reporting Items for Systematic reviews and Meta-Analyses extension for Scoping Reviews (PRISMA-ScR) Checklist

| SECTION                                               | ITEM | PRISMA-ScR CHECKLIST ITEM                                                                                                                                                                                                                                                                                  | REPORTED ON PAGE #                  |
|-------------------------------------------------------|------|------------------------------------------------------------------------------------------------------------------------------------------------------------------------------------------------------------------------------------------------------------------------------------------------------------|-------------------------------------|
| <b>TITLE</b>                                          |      |                                                                                                                                                                                                                                                                                                            |                                     |
| Title                                                 | 1    | Identify the report as a scoping review.                                                                                                                                                                                                                                                                   | 1                                   |
| <b>ABSTRACT</b>                                       |      |                                                                                                                                                                                                                                                                                                            |                                     |
| Structured summary                                    | 2    | Provide a structured summary that includes (as applicable): background, objectives, eligibility criteria, sources of evidence, charting methods, results, and conclusions that relate to the review questions and objectives.                                                                              | 1, 2                                |
| <b>INTRODUCTION</b>                                   |      |                                                                                                                                                                                                                                                                                                            |                                     |
| Rationale                                             | 3    | Describe the rationale for the review in the context of what is already known. Explain why the review questions/objectives lend themselves to a scoping review approach.                                                                                                                                   | 2, 3, 4,5                           |
| Objectives                                            | 4    | Provide an explicit statement of the questions and objectives being addressed with reference to their key elements (e.g., population or participants, concepts, and context) or other relevant key elements used to conceptualize the review questions and/or objectives.                                  | 4                                   |
| <b>METHODS</b>                                        |      |                                                                                                                                                                                                                                                                                                            |                                     |
| Protocol and registration                             | 5    | Indicate whether a review protocol exists; state if and where it can be accessed (e.g., a Web address); and if available, provide registration information, including the registration number.                                                                                                             | A protocol exists but not published |
| Eligibility criteria                                  | 6    | Specify characteristics of the sources of evidence used as eligibility criteria (e.g., years considered, language, and publication status), and provide a rationale.                                                                                                                                       | 5,6                                 |
| Information sources*                                  | 7    | Describe all information sources in the search (e.g., databases with dates of coverage and contact with authors to identify additional sources), as well as the date the most recent search was executed.                                                                                                  | 6,7                                 |
| Search                                                | 8    | Present the full electronic search strategy for at least 1 database, including any limits used, such that it could be repeated.                                                                                                                                                                            | 6,7                                 |
| Selection of sources of evidence†                     | 9    | State the process for selecting sources of evidence (i.e., screening and eligibility) included in the scoping review.                                                                                                                                                                                      | 6, 7                                |
| Data charting process‡                                | 10   | Describe the methods of charting data from the included sources of evidence (e.g., calibrated forms or forms that have been tested by the team before their use, and whether data charting was done independently or in duplicate) and any processes for obtaining and confirming data from investigators. | 7                                   |
| Data items                                            | 11   | List and define all variables for which data were sought and any assumptions and simplifications made.                                                                                                                                                                                                     | 5, 6                                |
| Critical appraisal of individual sources of evidence§ | 12   | If done, provide a rationale for conducting a critical appraisal of included sources of evidence; describe the methods used and how this information was used in any data synthesis (if appropriate).                                                                                                      | 7                                   |

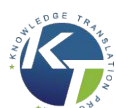

| SECTION                                       | ITEM | PRISMA-ScR CHECKLIST ITEM                                                                                                                                                                       | REPORTED ON PAGE # |
|-----------------------------------------------|------|-------------------------------------------------------------------------------------------------------------------------------------------------------------------------------------------------|--------------------|
| Synthesis of results                          | 13   | Describe the methods of handling and summarizing the data that were charted.                                                                                                                    | 8                  |
| <b>RESULTS</b>                                |      |                                                                                                                                                                                                 |                    |
| Selection of sources of evidence              | 14   | Give numbers of sources of evidence screened, assessed for eligibility, and included in the review, with reasons for exclusions at each stage, ideally using a flow diagram.                    | 2, 7, 8            |
| Characteristics of sources of evidence        | 15   | For each source of evidence, present characteristics for which data were charted and provide the citations.                                                                                     | 2, 6, 7, 8, 9      |
| Critical appraisal within sources of evidence | 16   | If done, present data on critical appraisal of included sources of evidence (see item 12).                                                                                                      | 7                  |
| Results of individual sources of evidence     | 17   | For each included source of evidence, present the relevant data that were charted that relate to the review questions and objectives.                                                           | 8-12               |
| Synthesis of results                          | 18   | Summarize and/or present the charting results as they relate to the review questions and objectives.                                                                                            | 8-12               |
| <b>DISCUSSION</b>                             |      |                                                                                                                                                                                                 |                    |
| Summary of evidence                           | 19   | Summarize the main results (including an overview of concepts, themes, and types of evidence available), link to the review questions and objectives, and consider the relevance to key groups. | 1, 12-14           |
| Limitations                                   | 20   | Discuss the limitations of the scoping review process.                                                                                                                                          | 1, 14              |
| Conclusions                                   | 21   | Provide a general interpretation of the results with respect to the review questions and objectives, as well as potential implications and/or next steps.                                       | 1, 14              |
| <b>FUNDING</b>                                |      |                                                                                                                                                                                                 |                    |
| Funding                                       | 22   | Describe sources of funding for the included sources of evidence, as well as sources of funding for the scoping review. Describe the role of the funders of the scoping review.                 | 15                 |

JBI = Joanna Briggs Institute; PRISMA-ScR = Preferred Reporting Items for Systematic reviews and Meta-Analyses extension for Scoping Reviews.

\* Where *sources of evidence* (see second footnote) are compiled from, such as bibliographic databases, social media platforms, and Web sites.

† A more inclusive/heterogeneous term used to account for the different types of evidence or data sources (e.g., quantitative and/or qualitative research, expert opinion, and policy documents) that may be eligible in a scoping review as opposed to only studies. This is not to be confused with *information sources* (see first footnote).

‡ The frameworks by Arksey and O'Malley (6) and Levac and colleagues (7) and the JBI guidance (4, 5) refer to the process of data extraction in a scoping review as data charting.

§ The process of systematically examining research evidence to assess its validity, results, and relevance before using it to inform a decision. This term is used for items 12 and 19 instead of "risk of bias" (which is more applicable to systematic reviews of interventions) to include and acknowledge the various sources of evidence that may be used in a scoping review (e.g., quantitative and/or qualitative research, expert opinion, and policy document).

From: Tricco AC, Lillie E, Zarin W, O'Brien KK, Colquhoun H, Levac D, et al. PRISMA Extension for Scoping Reviews (PRISMA-ScR): Checklist and Explanation. *Ann Intern Med.* 2018;169:467–473. doi: 10.7326/M18-0850.



St. Michael's

Inspired Care.  
Inspiring Science.

For peer review only - <http://bmjopen.bmj.com/site/about/guidelines.xhtml>
